# Supplementary material for: Organocatalytic asymmetric syntheses of inthomycins A, B and C
Source: Royal Society of Chemistry journal article supplement (doi:10.1039/c2ob26084k), 2012-01-01

## **Organocatalytic asymmetric syntheses of inthomycin A, B and C**

Madoka Yoshino, Kohei Eto, Keisuke Takahasho, Jun Ishihara and Susumi Hatakeyama

*Graduate School of Biomedical Sciences, Nagasaki University, Nagasaki 852-8521, Japan*

### **Supporting Information**

#### **Table of Contents**

<sup>1</sup>H NMR (400 MHz, CDCl<sub>3</sub>) and <sup>13</sup>C NMR (100 MHz, CDCl<sub>3</sub>) spectra  
of all isolated intermediates and inthomycins A, B and C Page S2 - - - Page S59

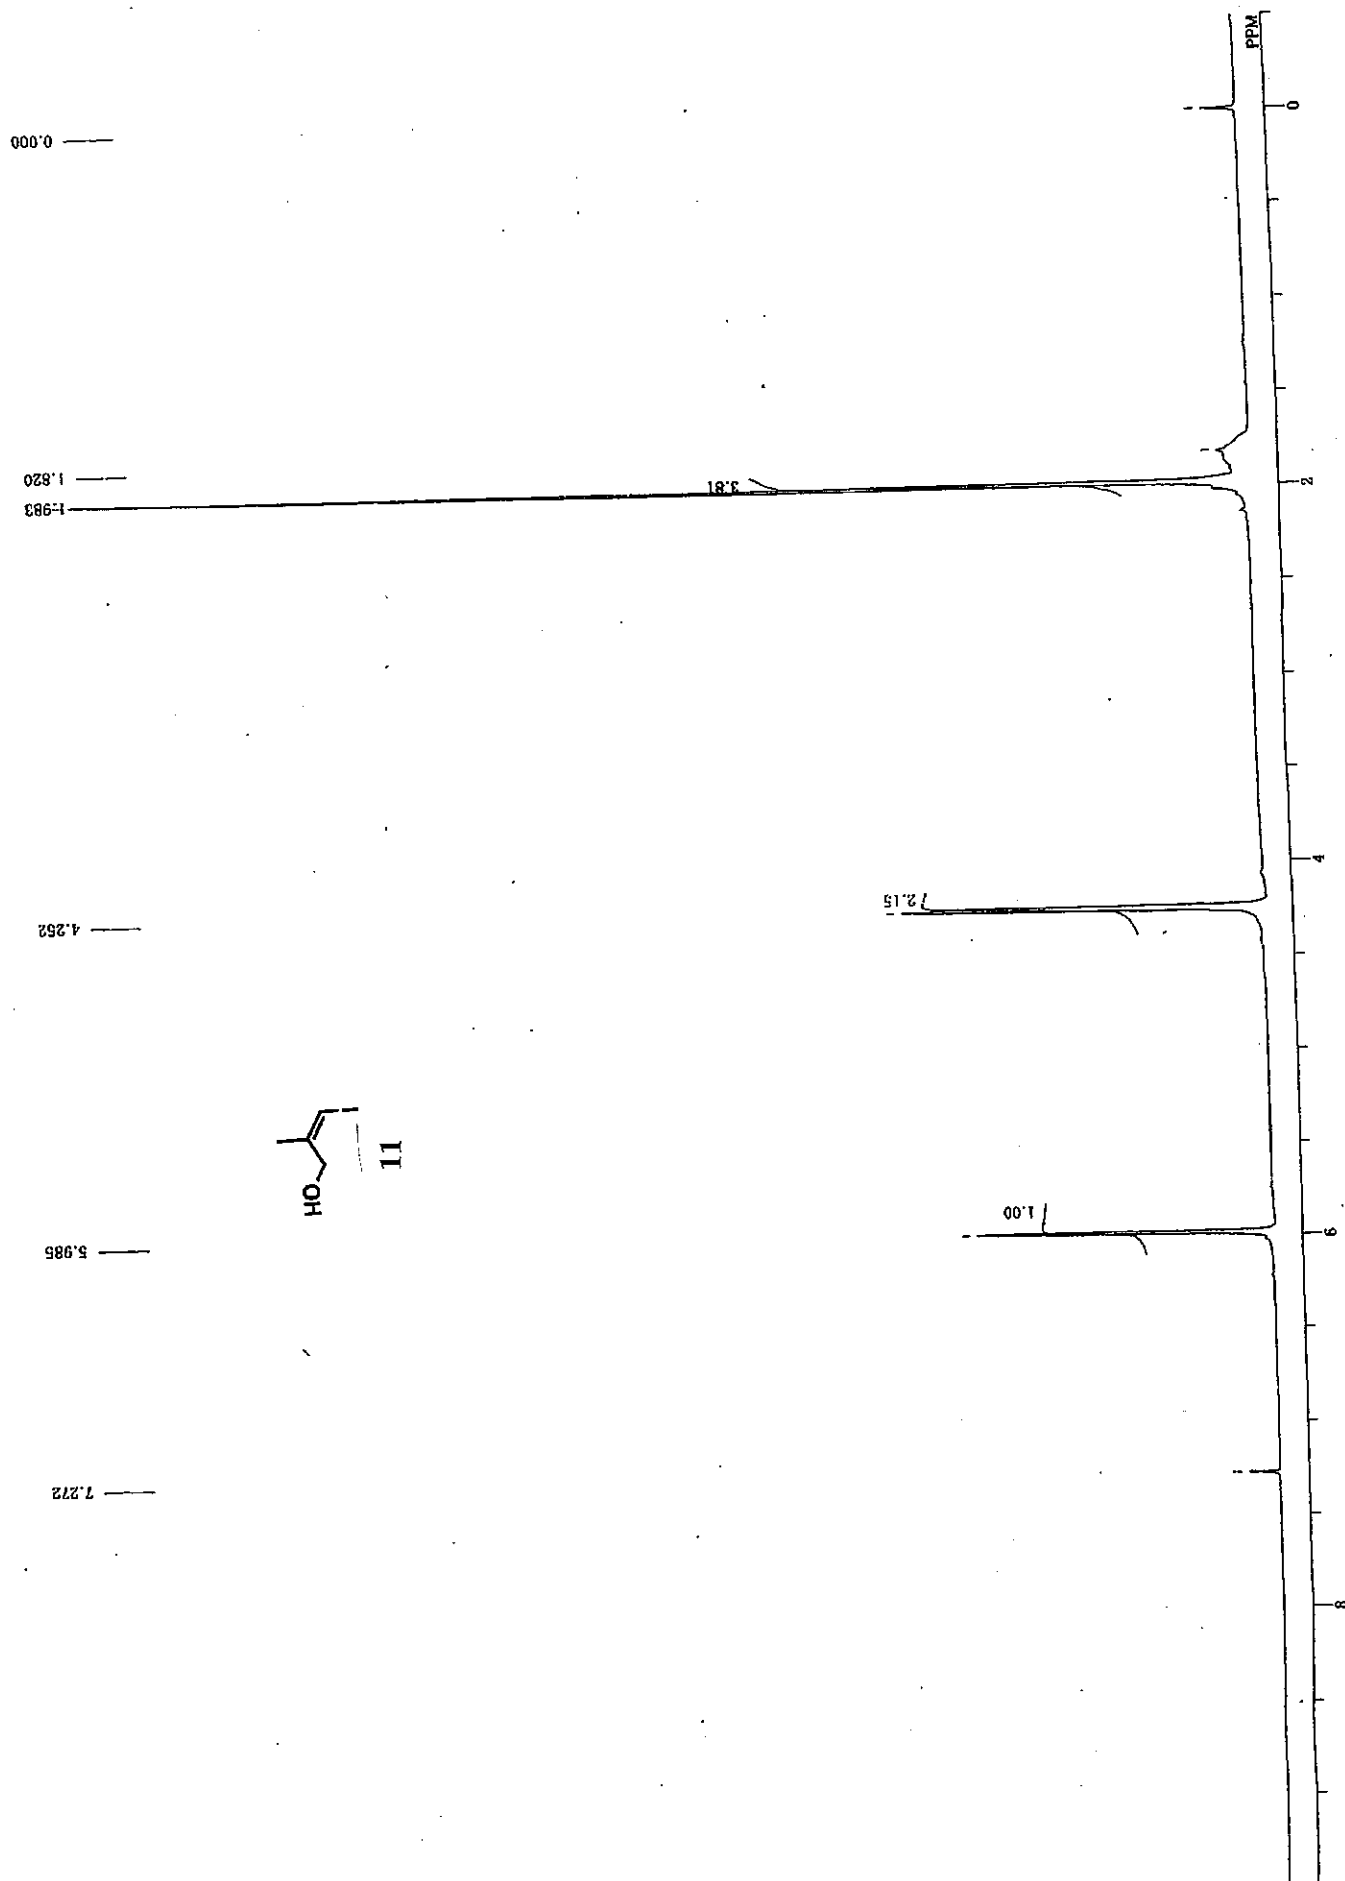

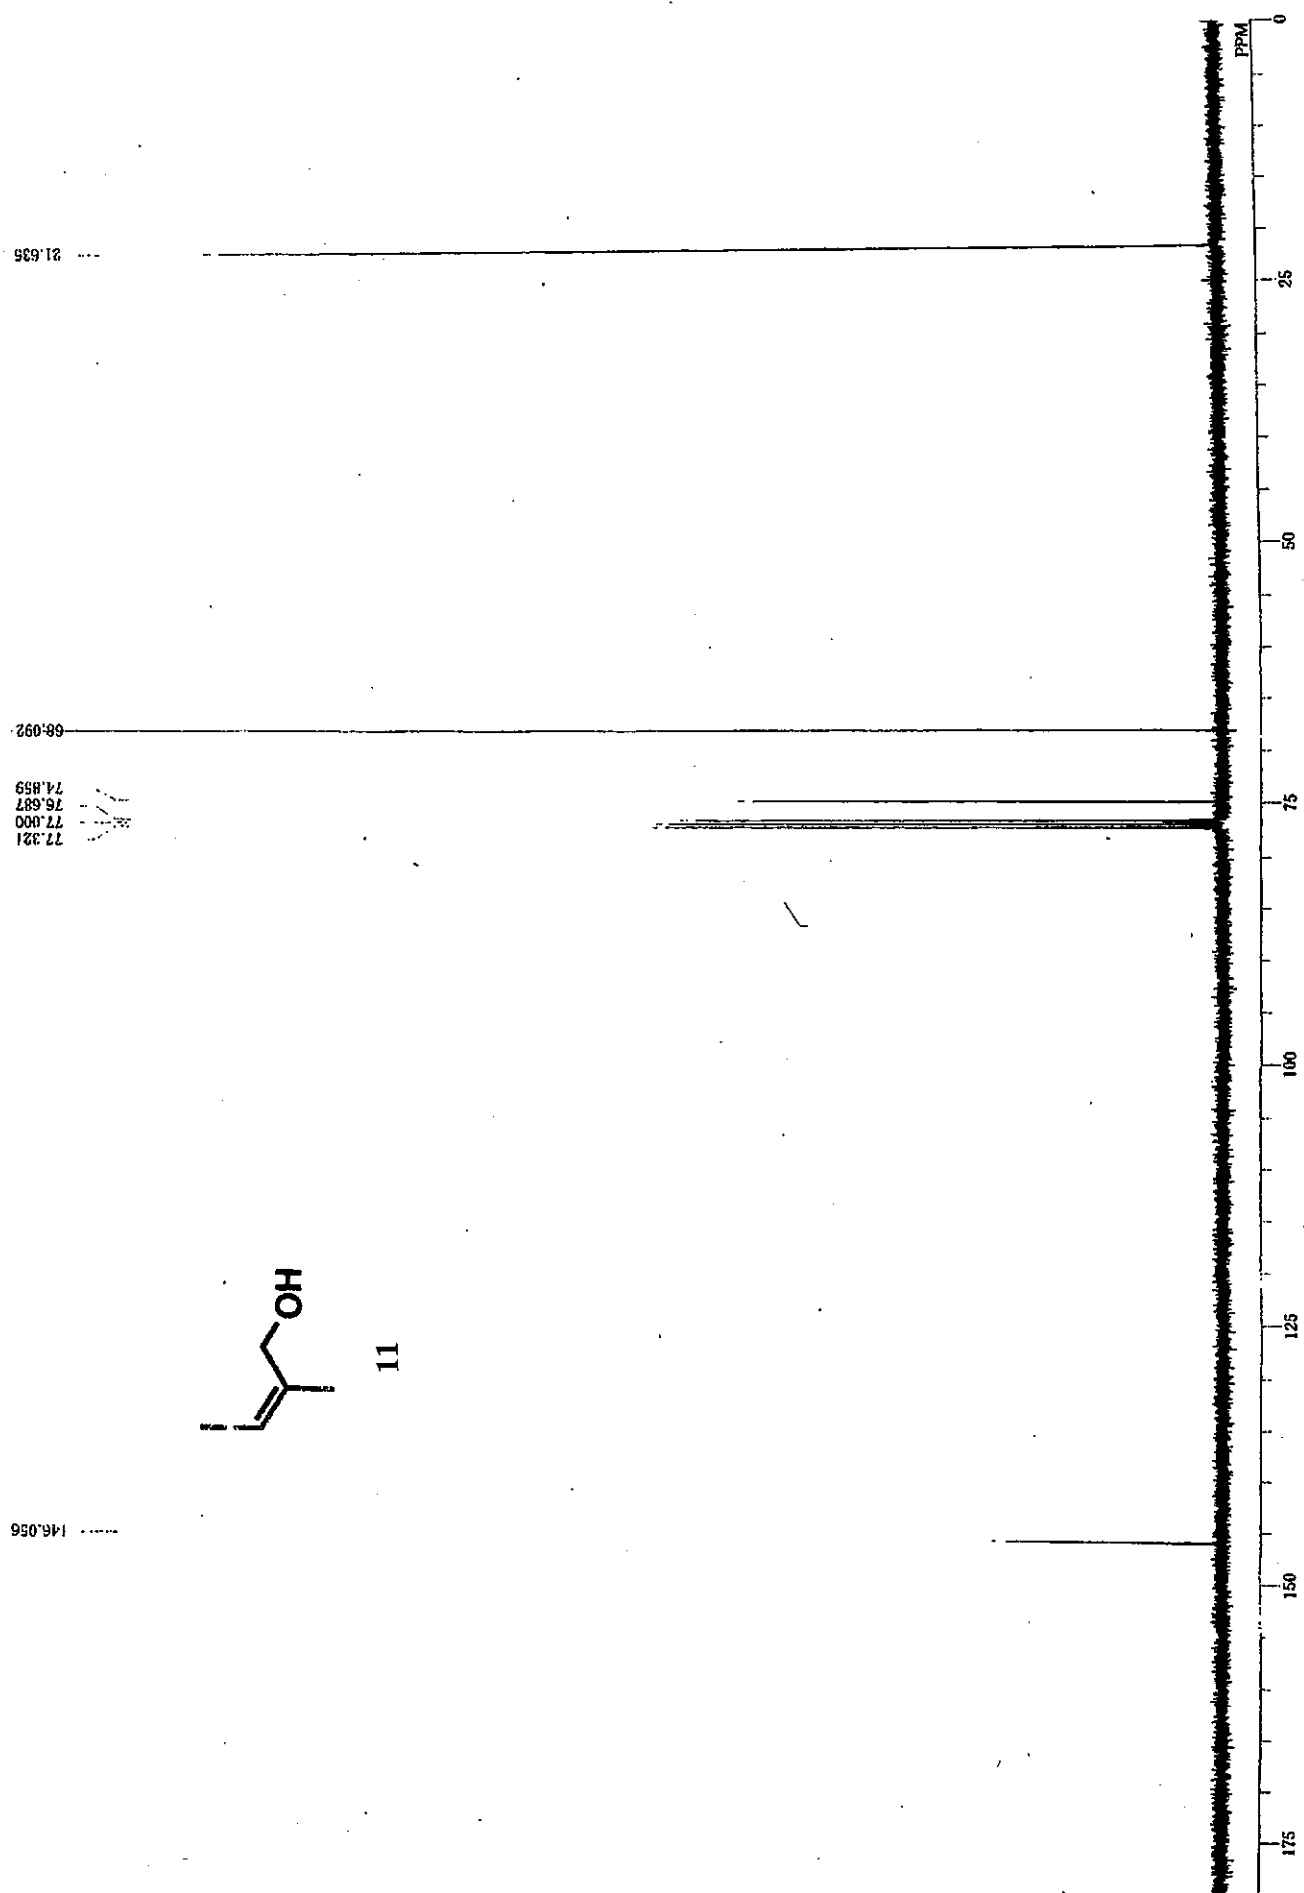

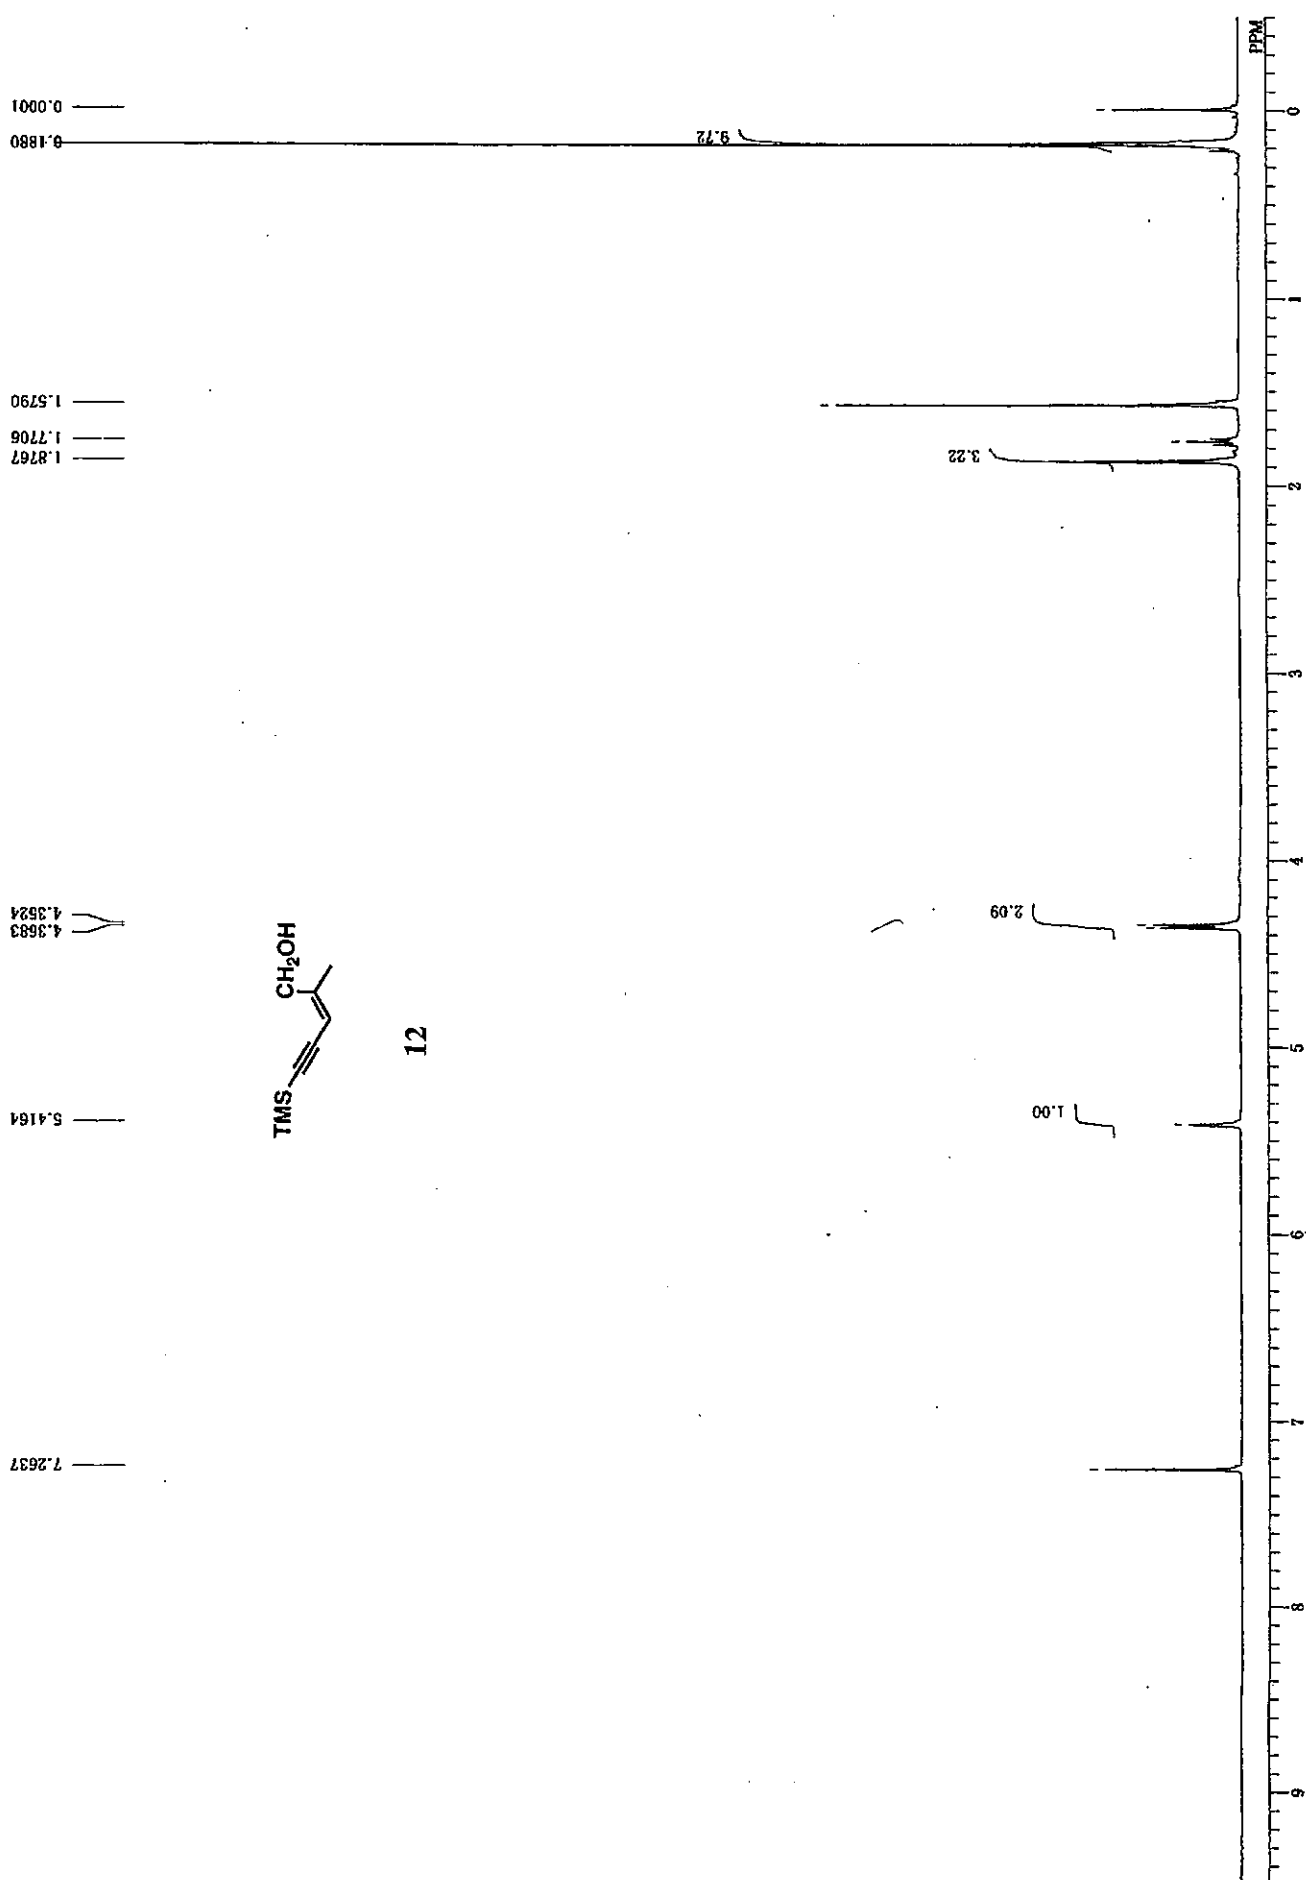

20.3018

64.1163

76.7617  
77.0828  
77.4038

101.6245

106.9548

151.8933

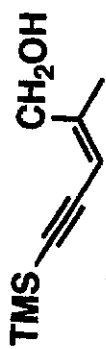

12

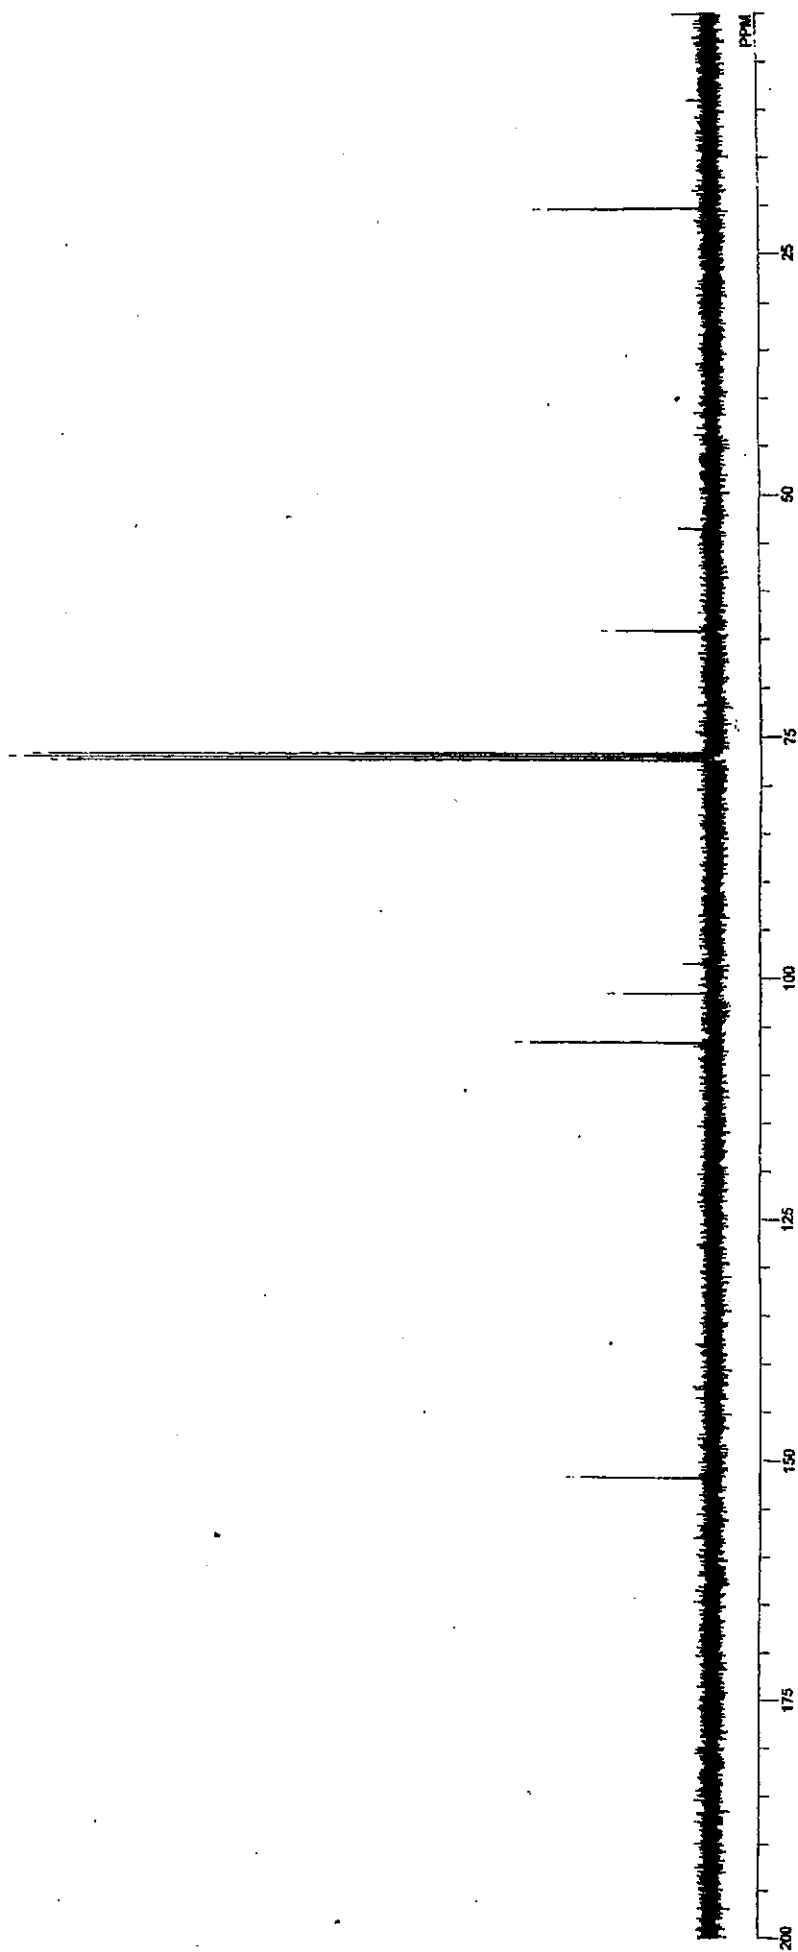

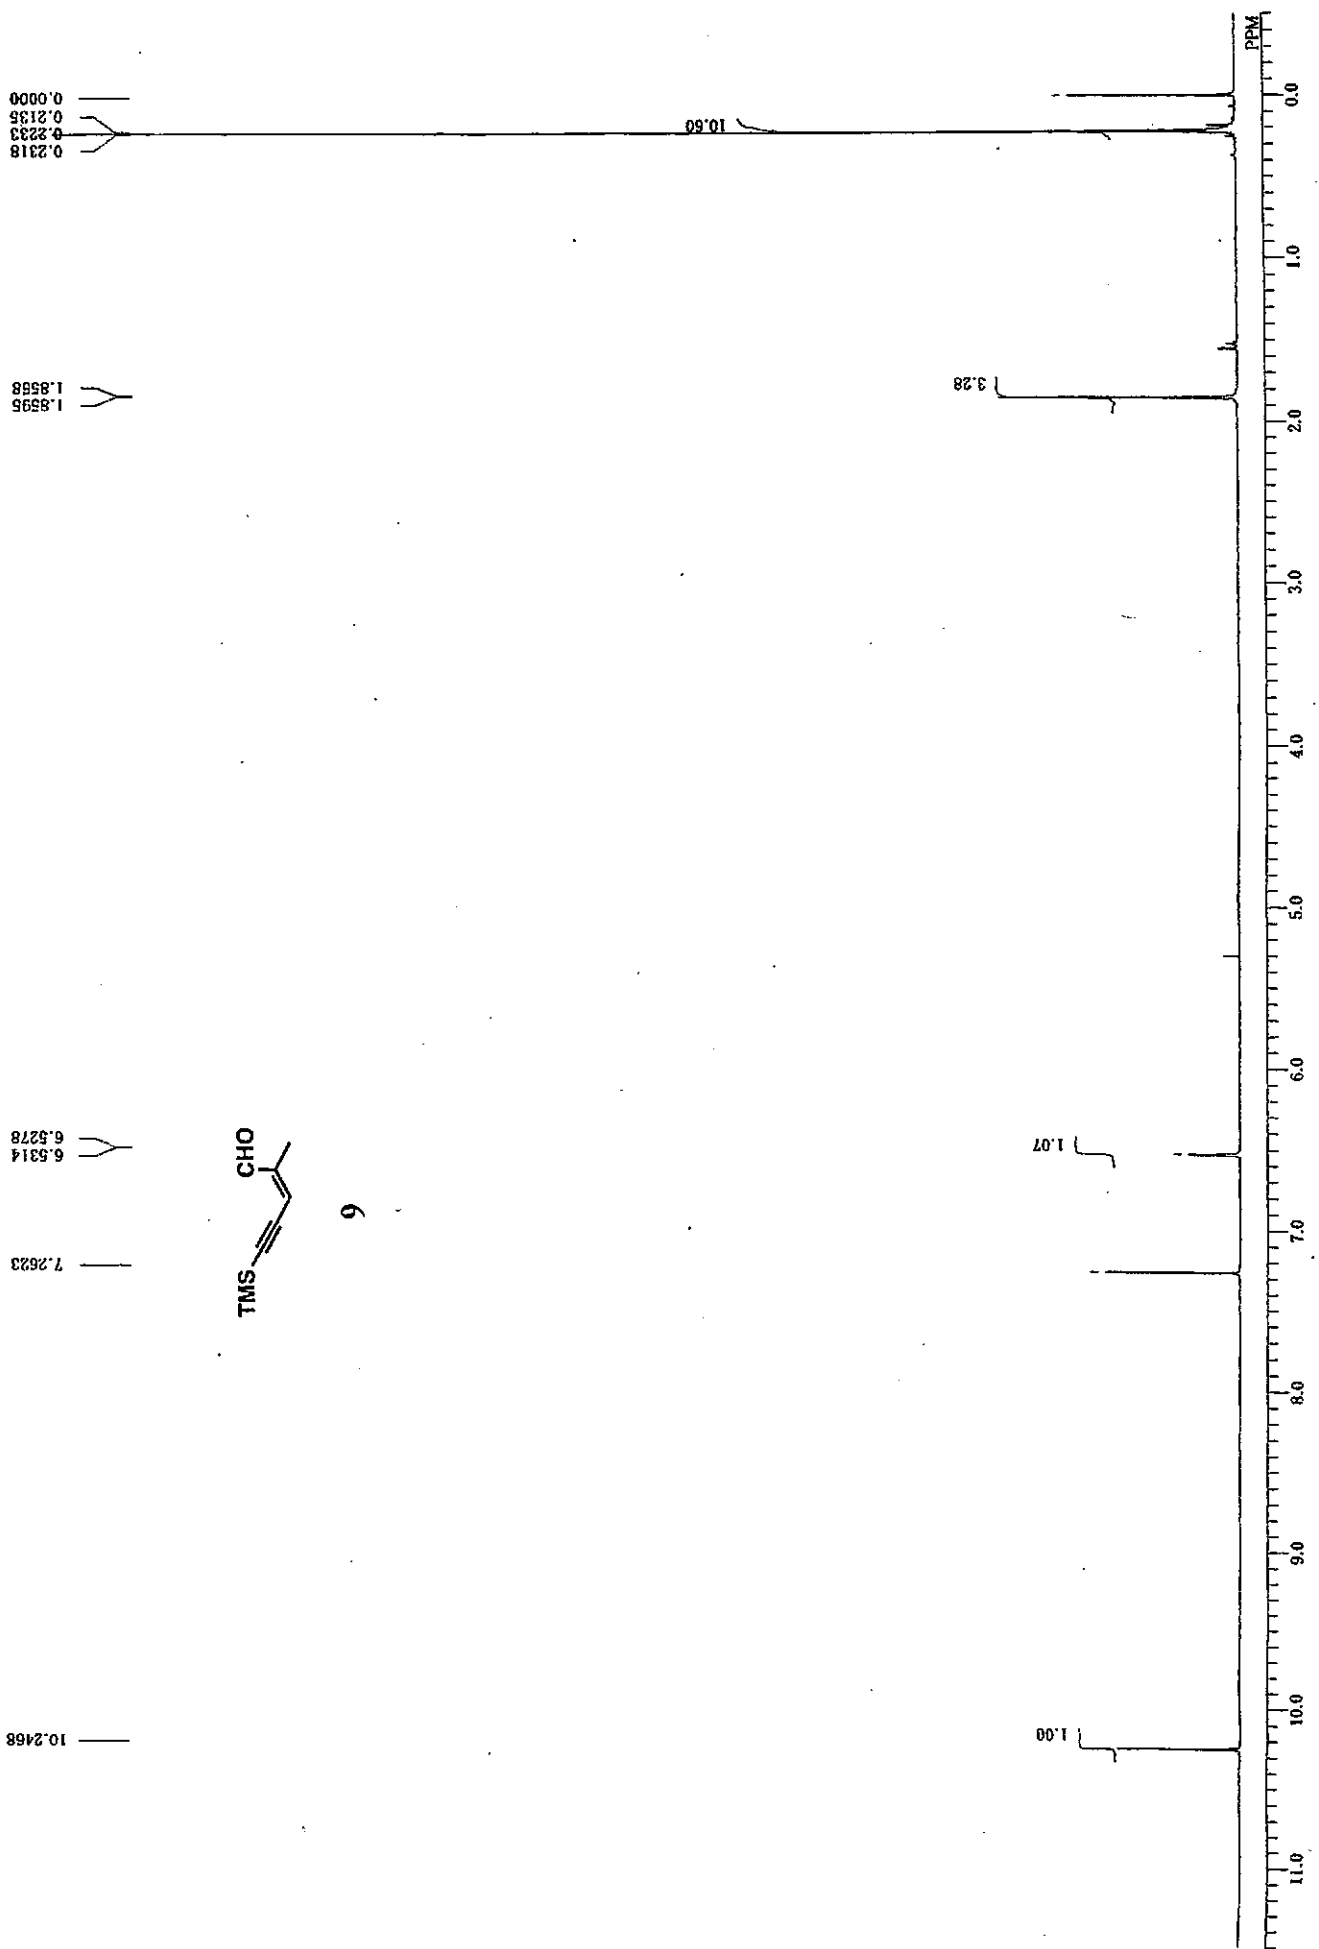

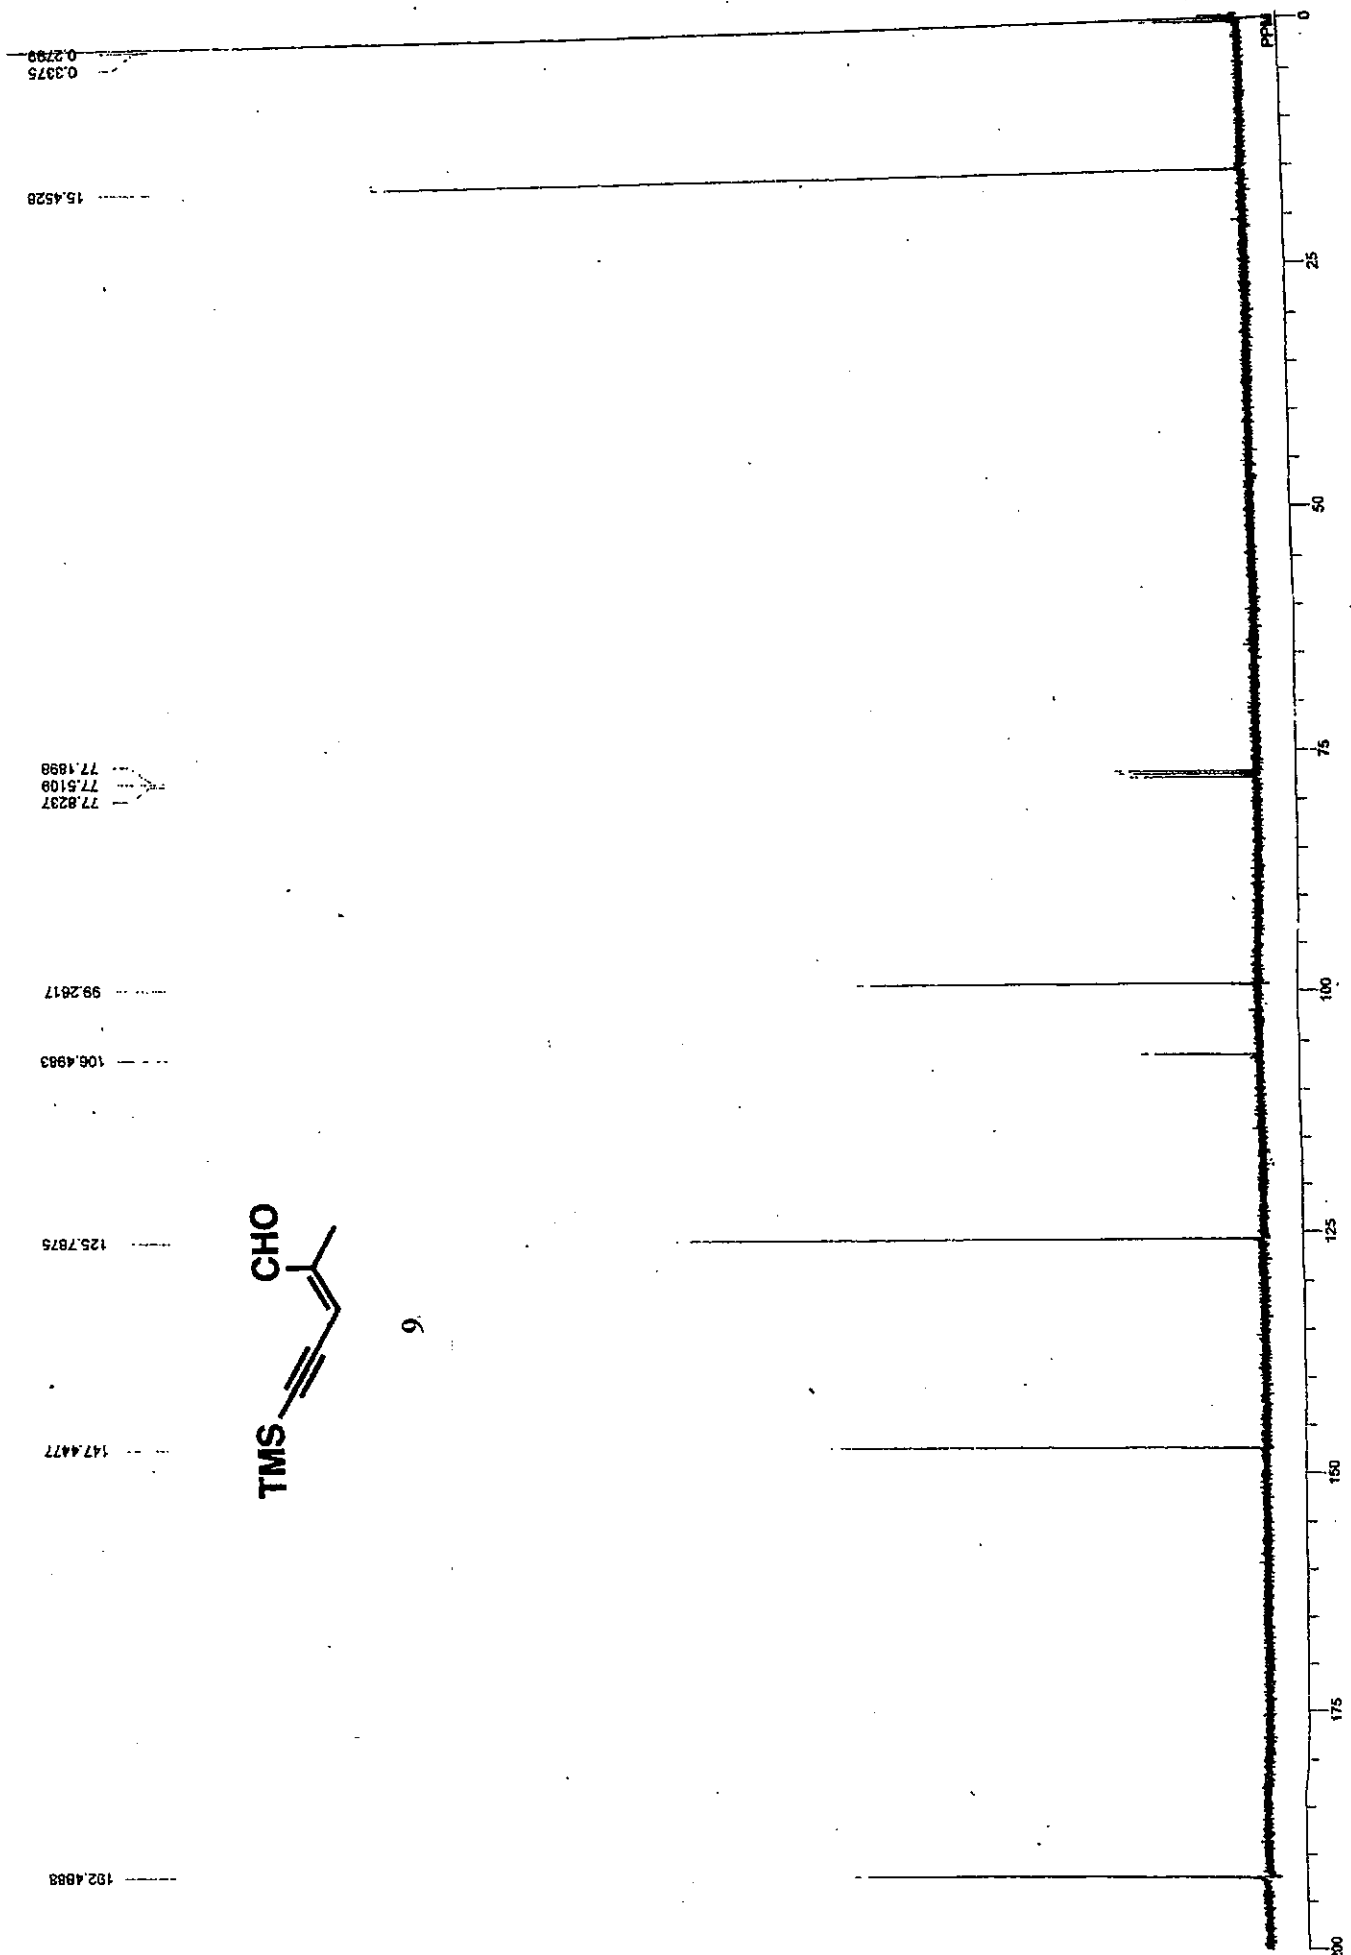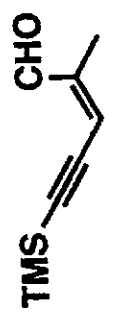

6

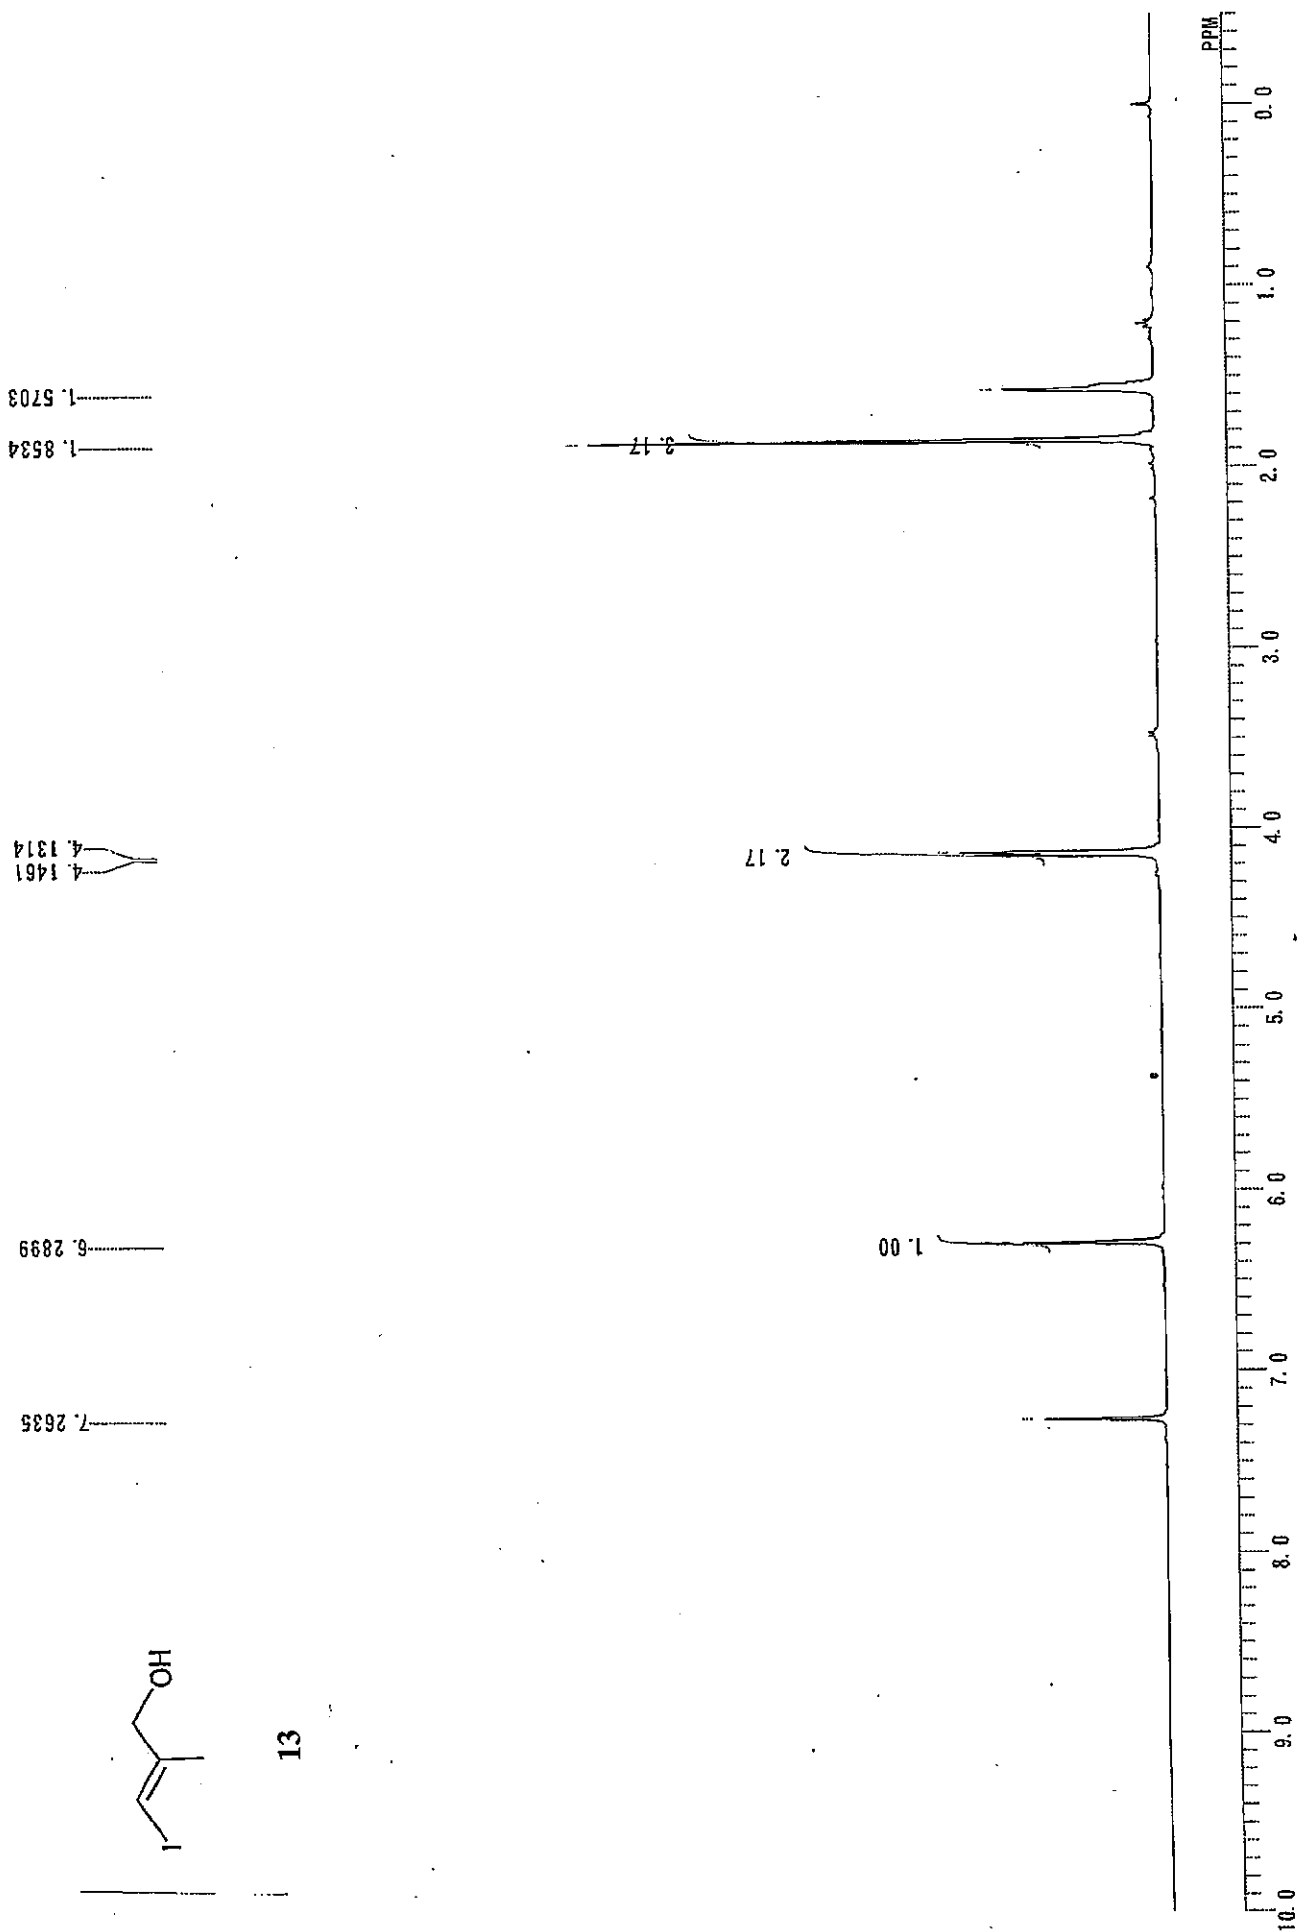



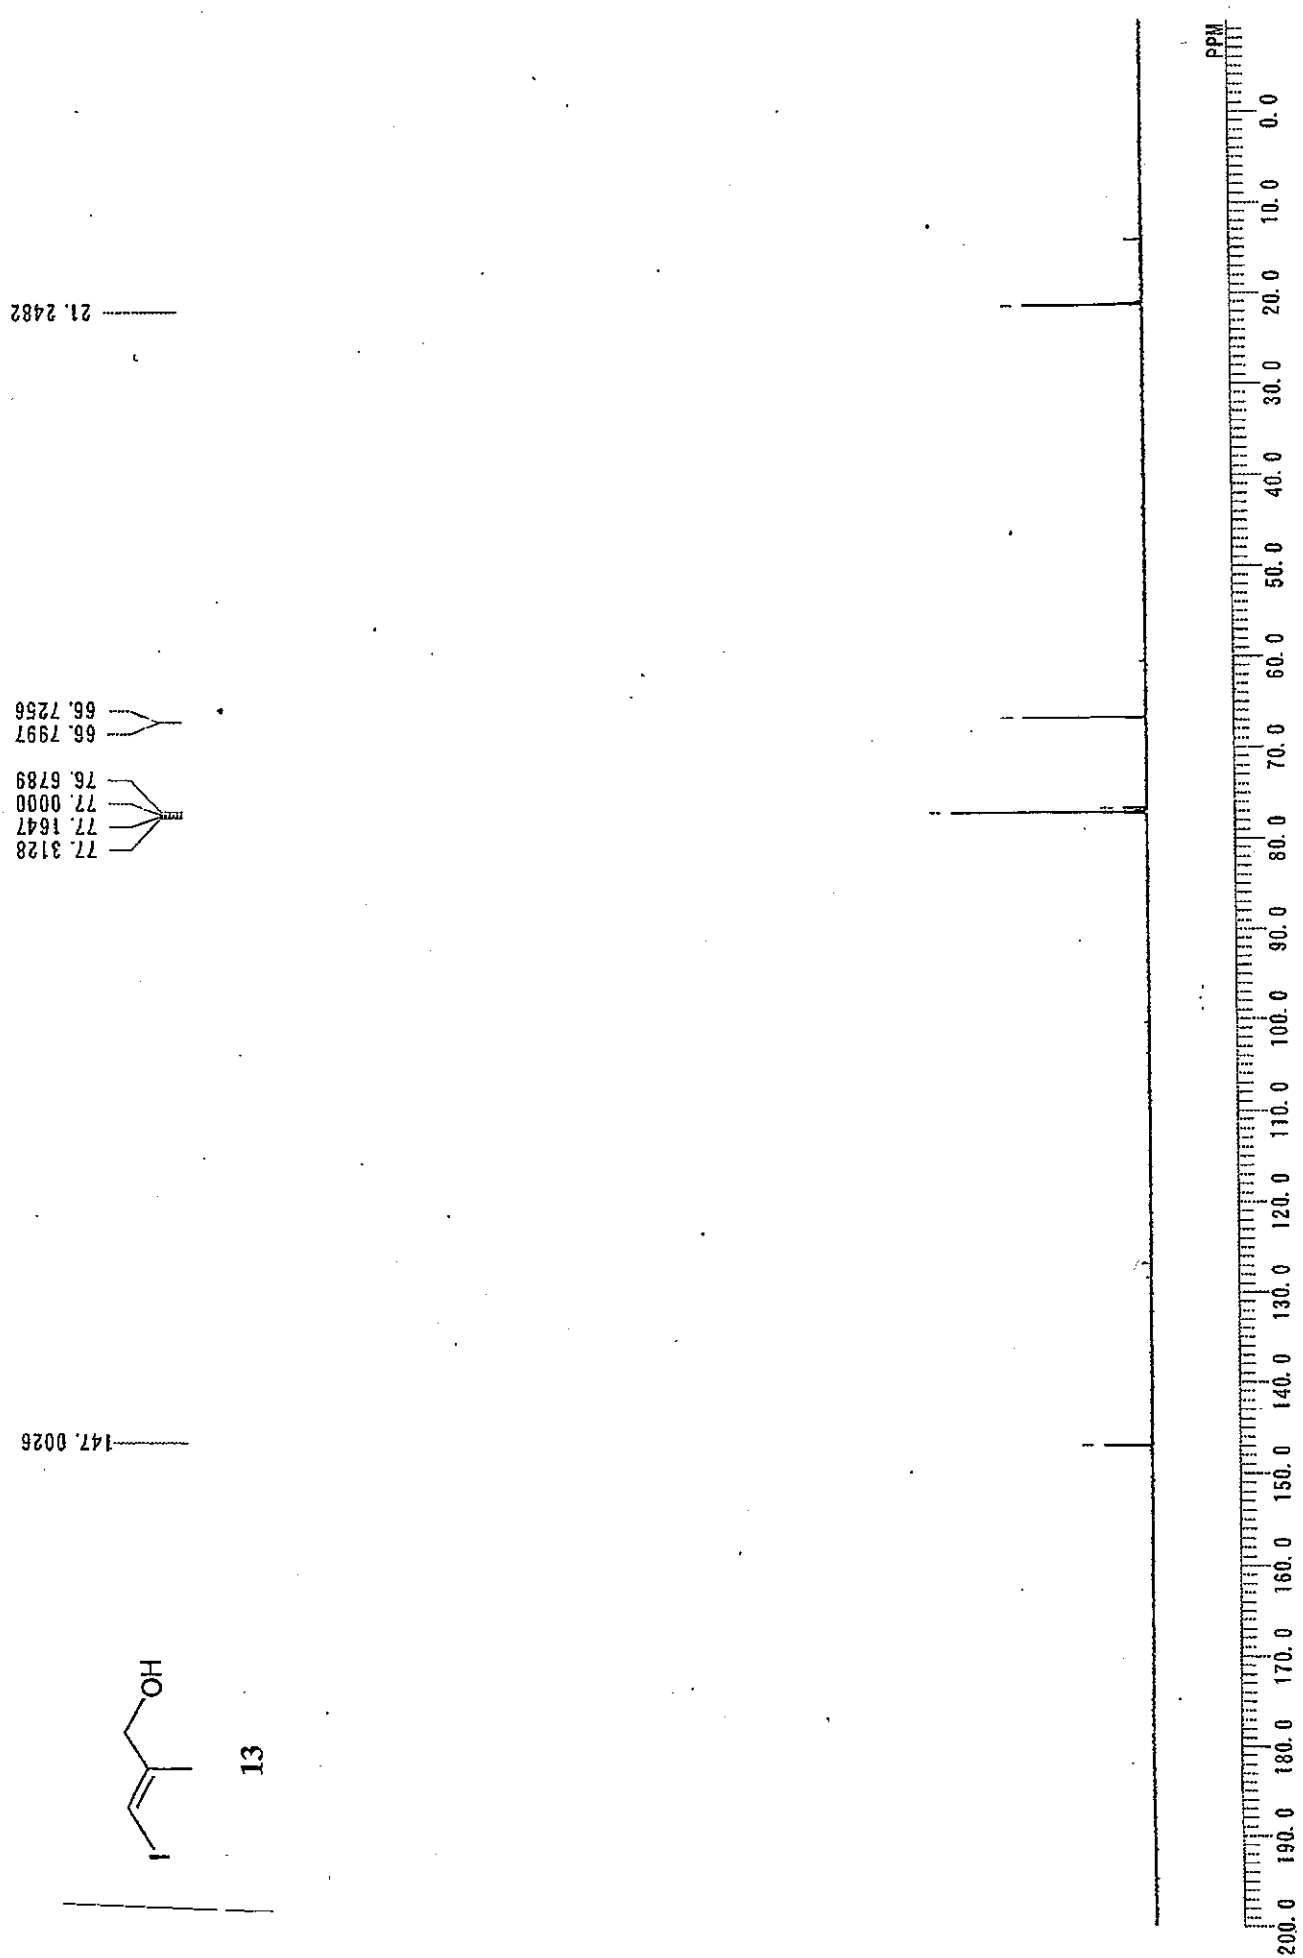

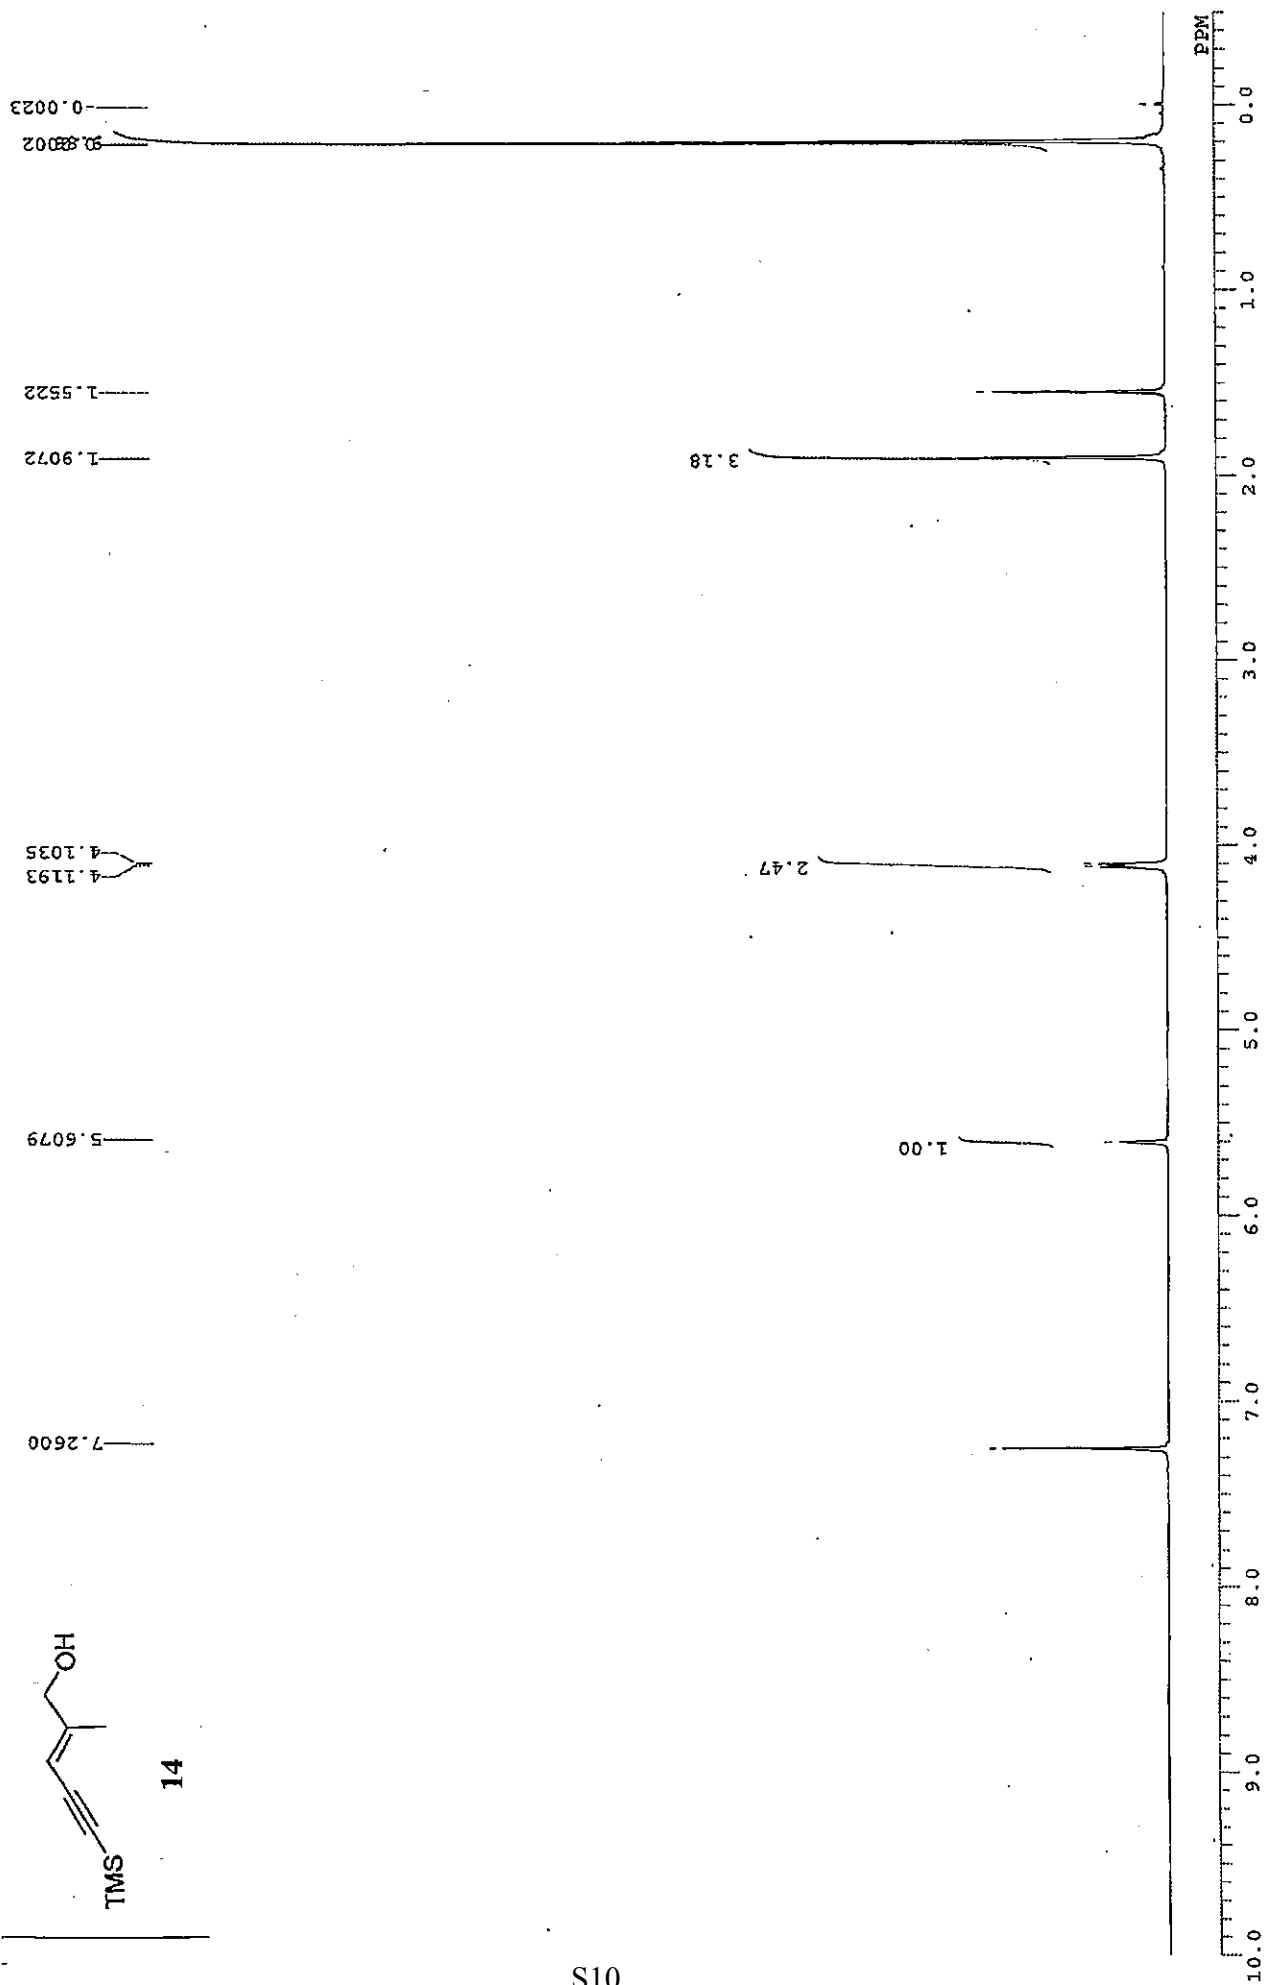

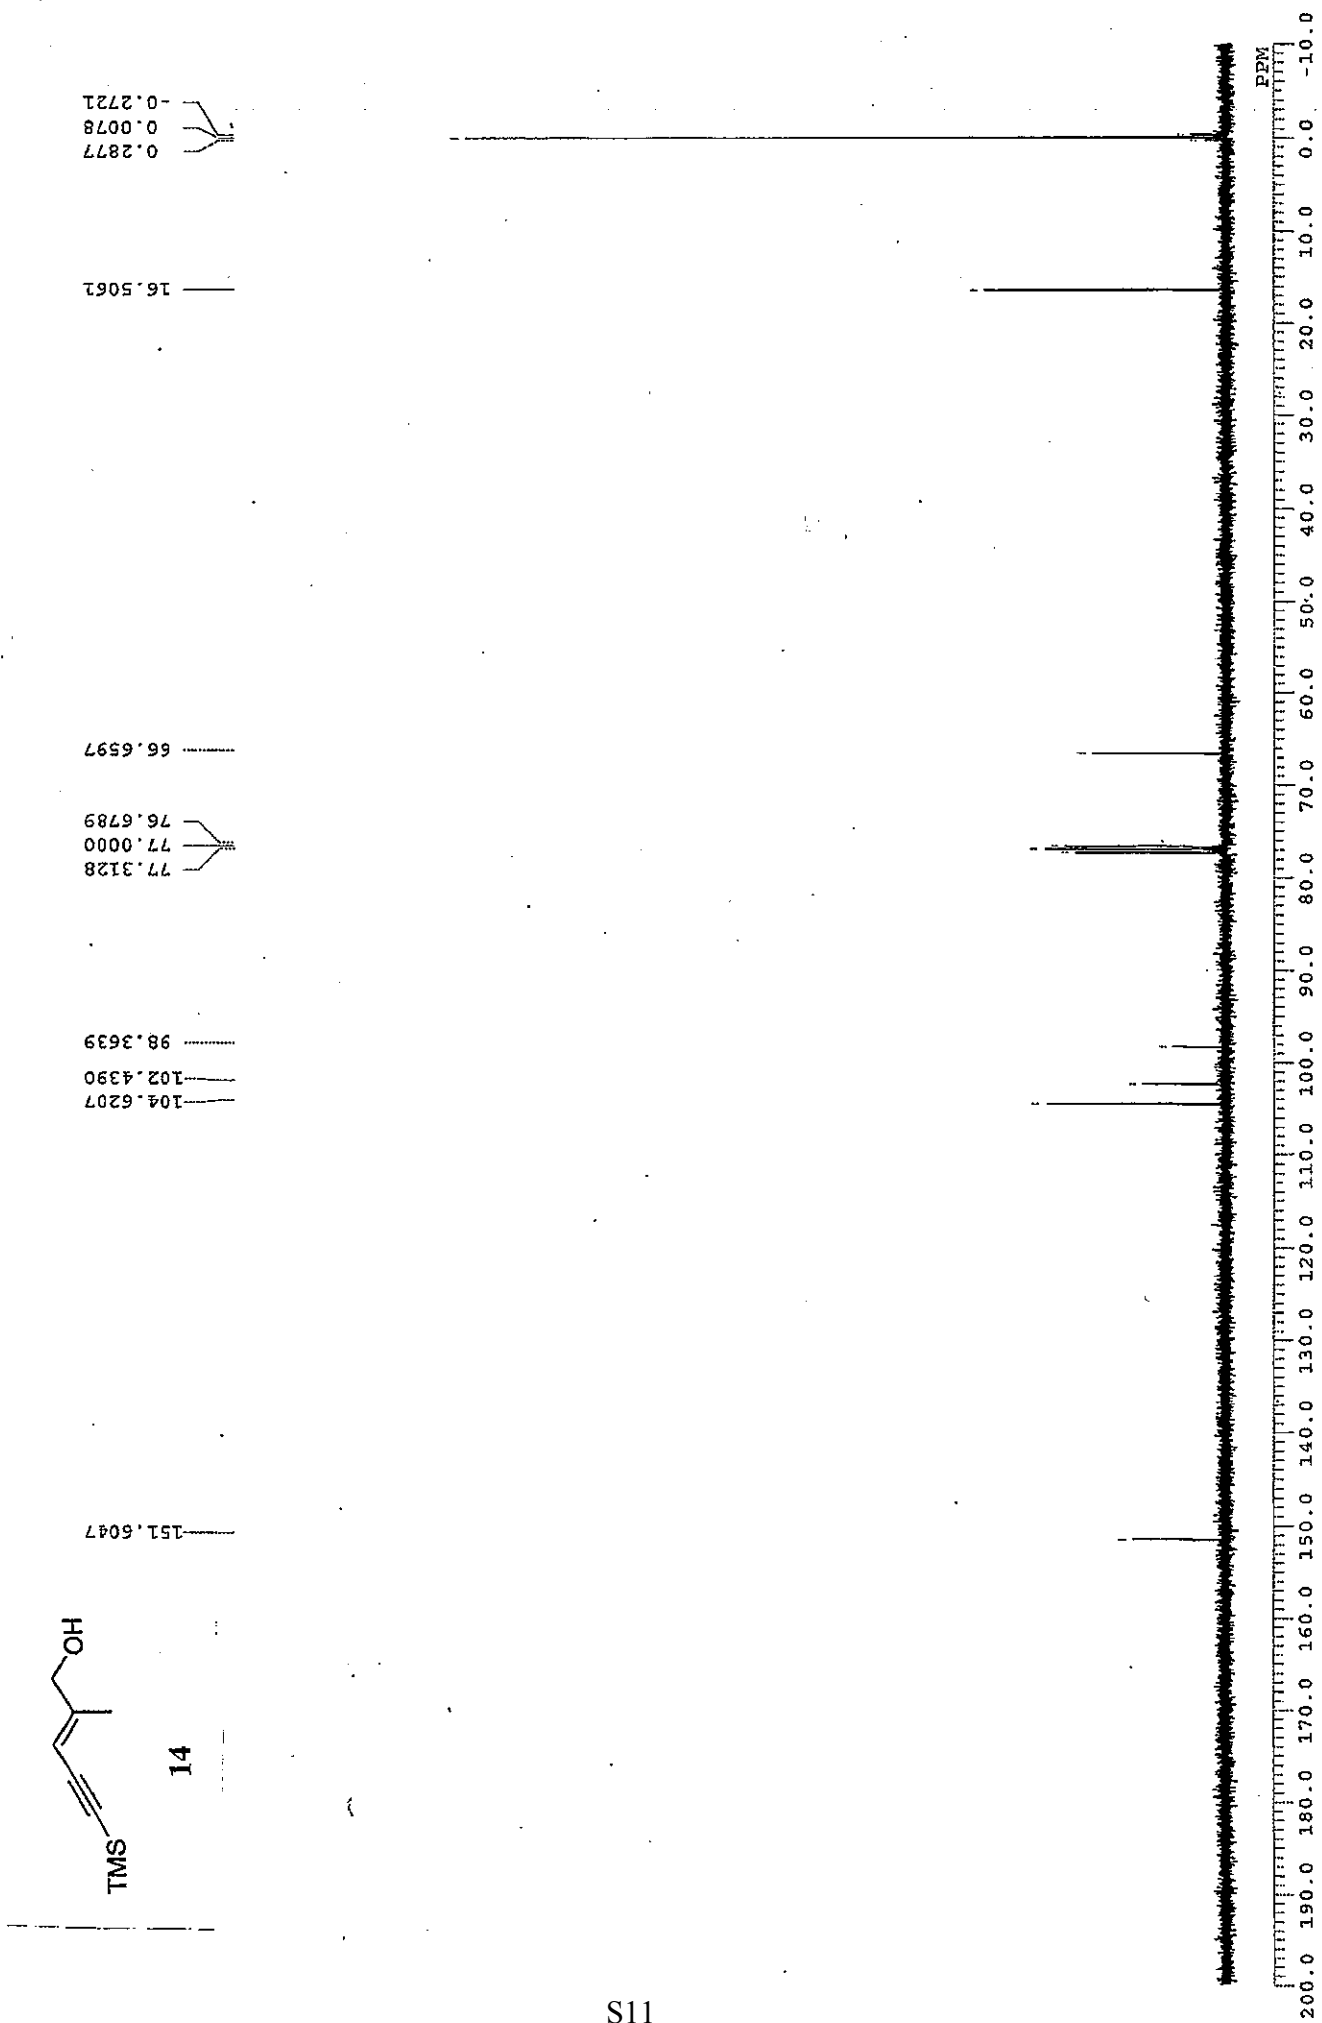

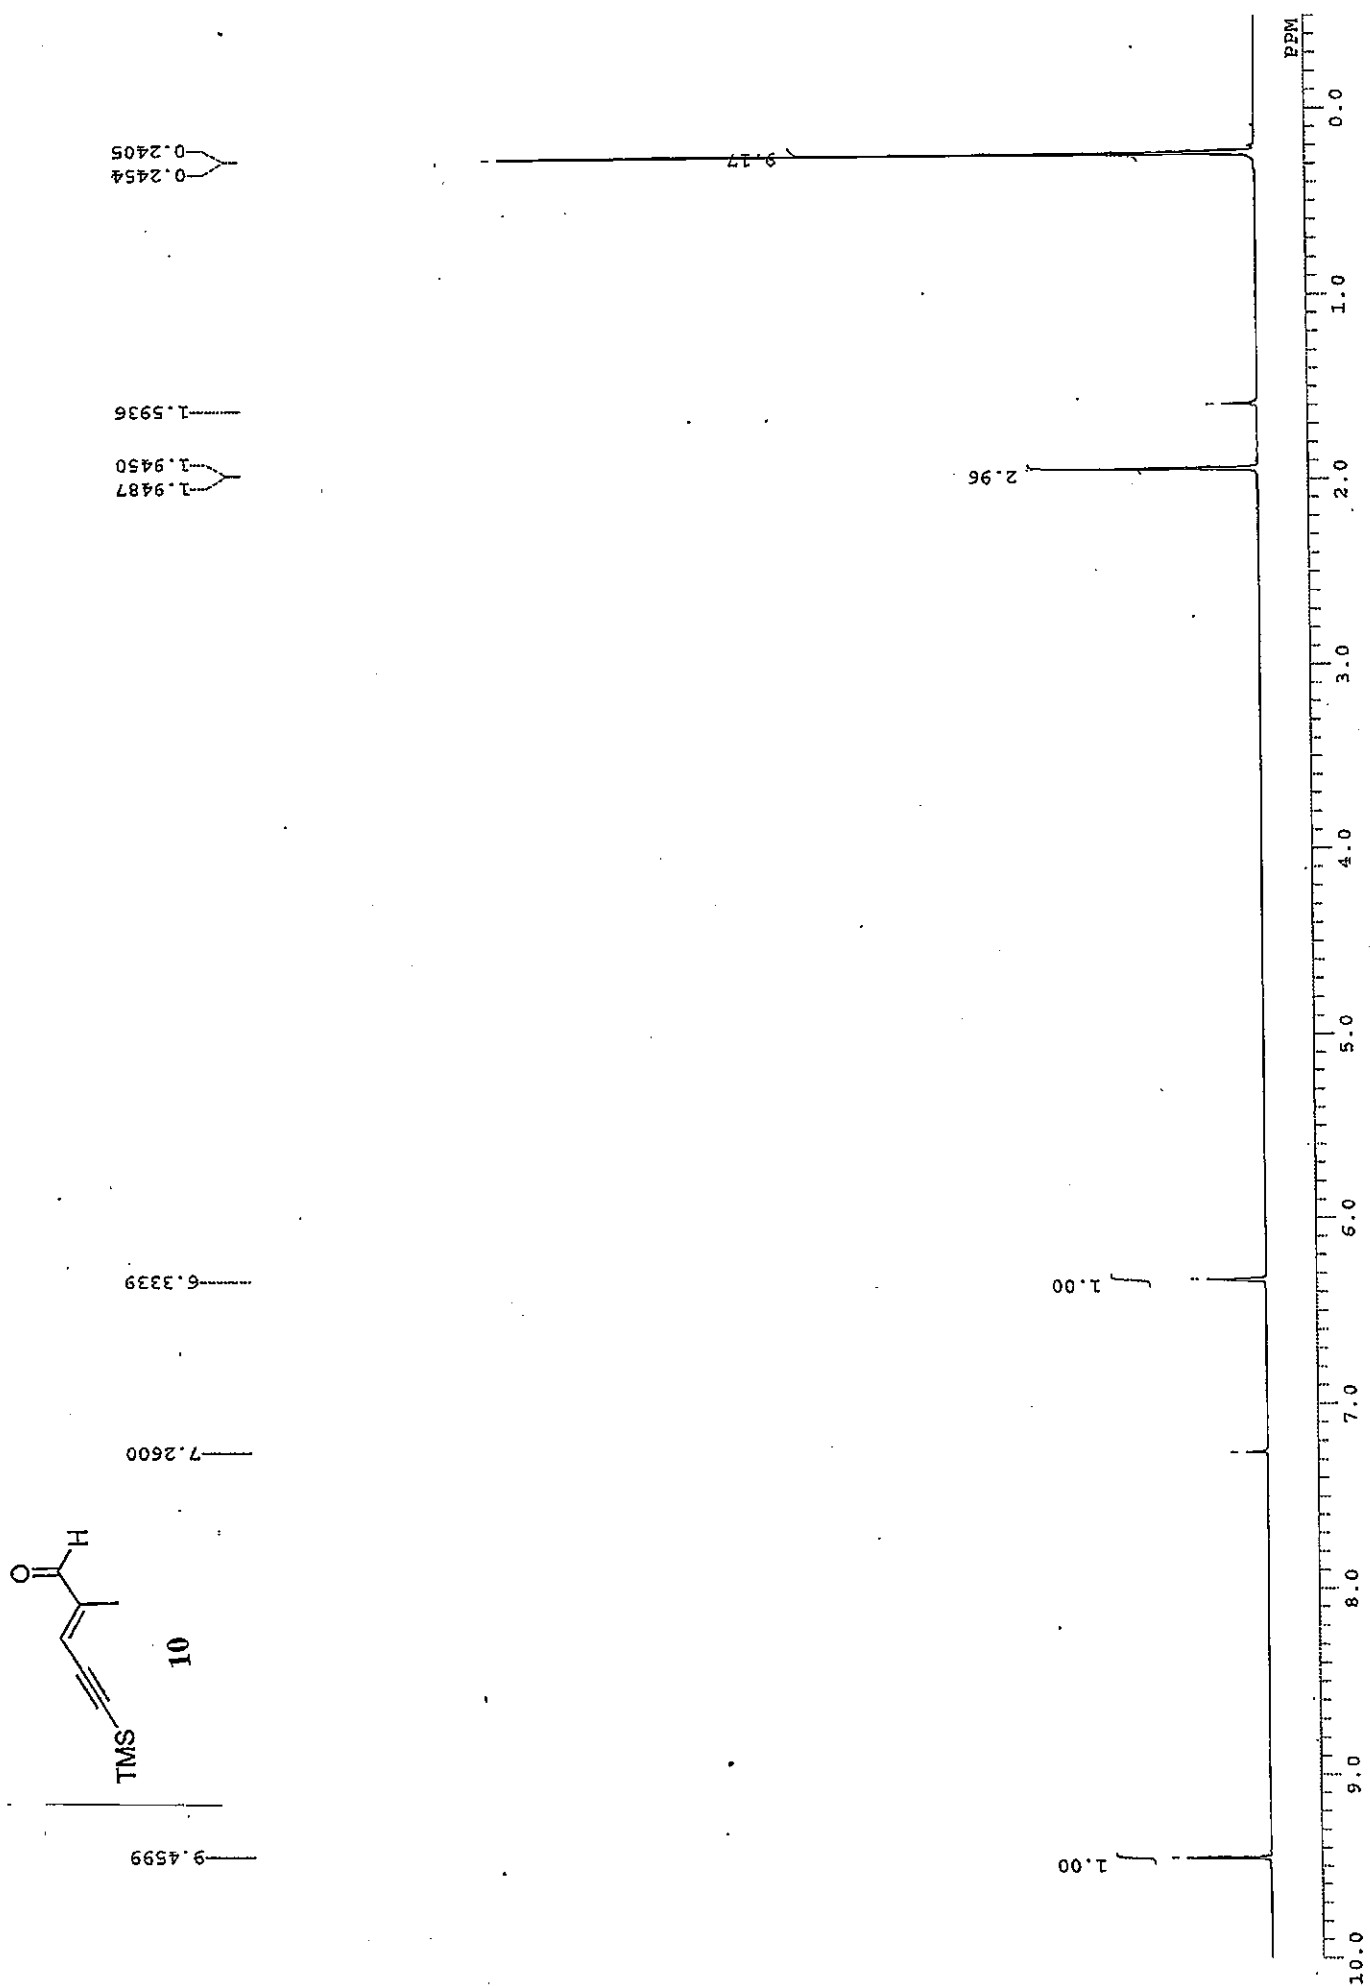

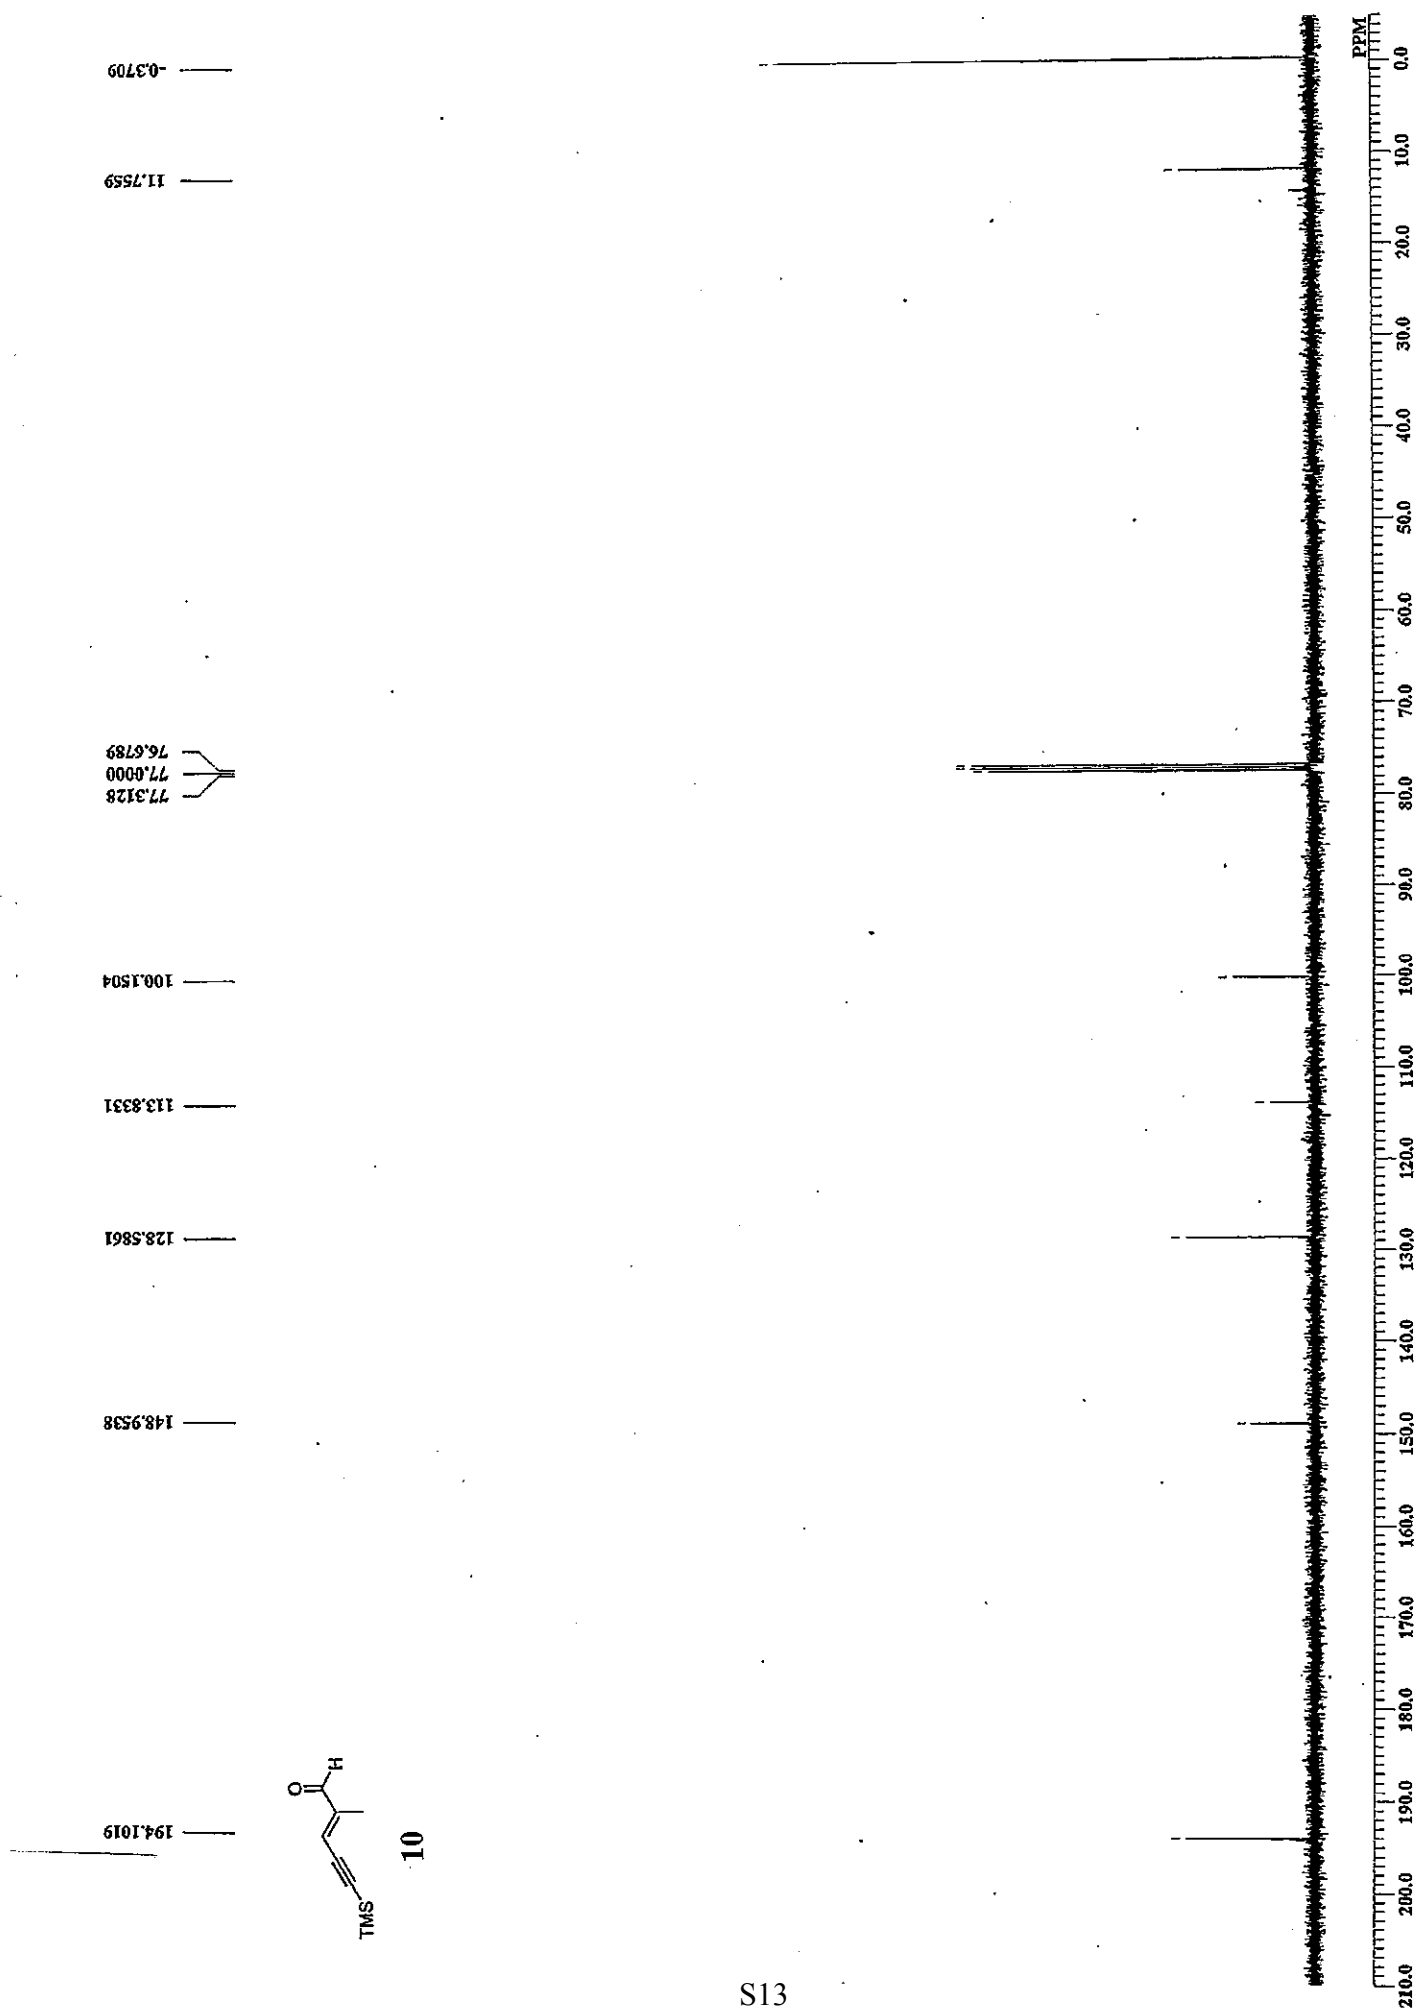

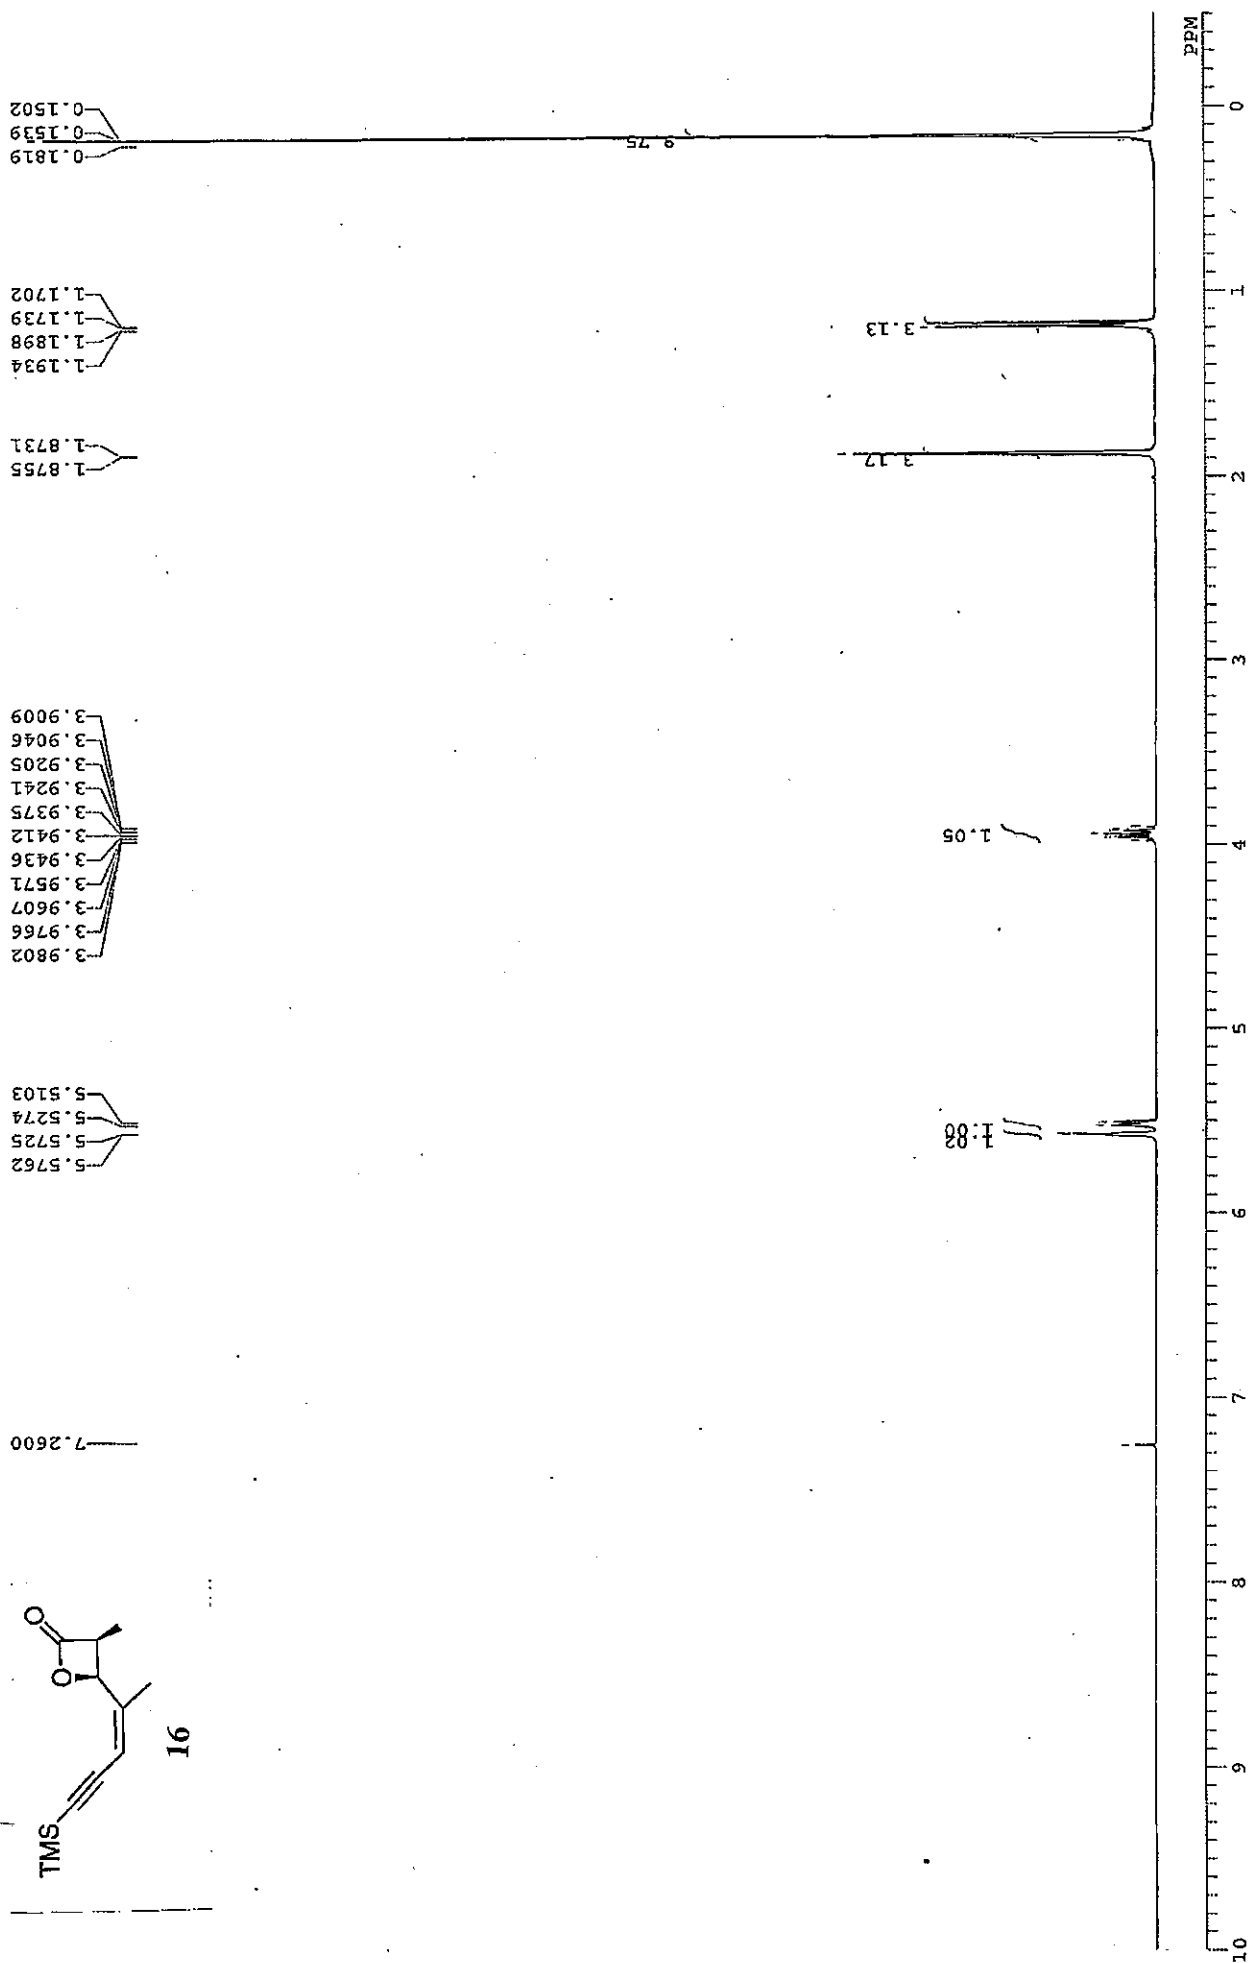

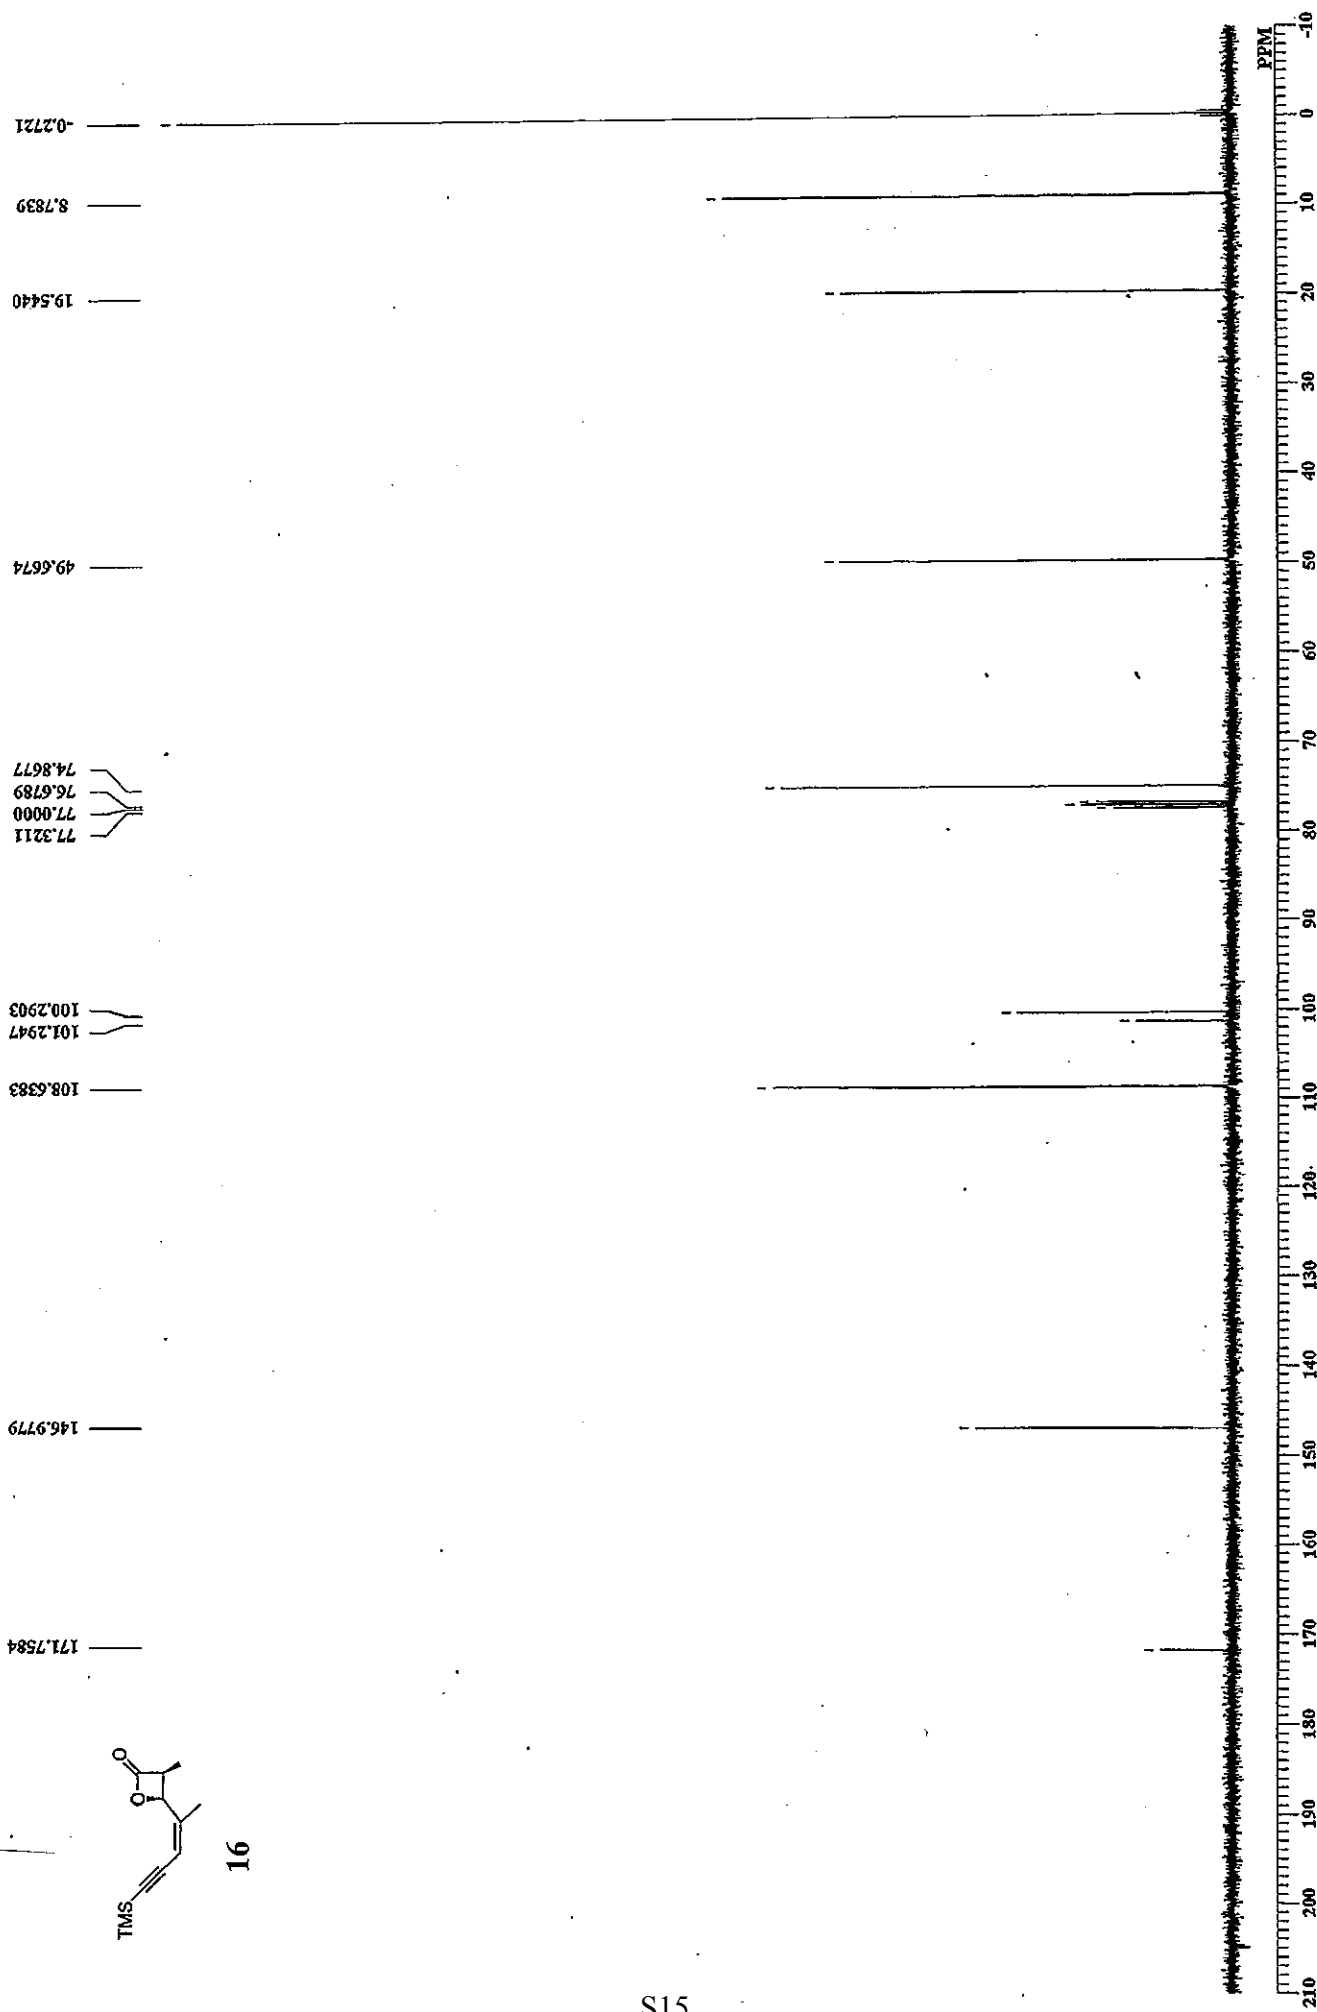

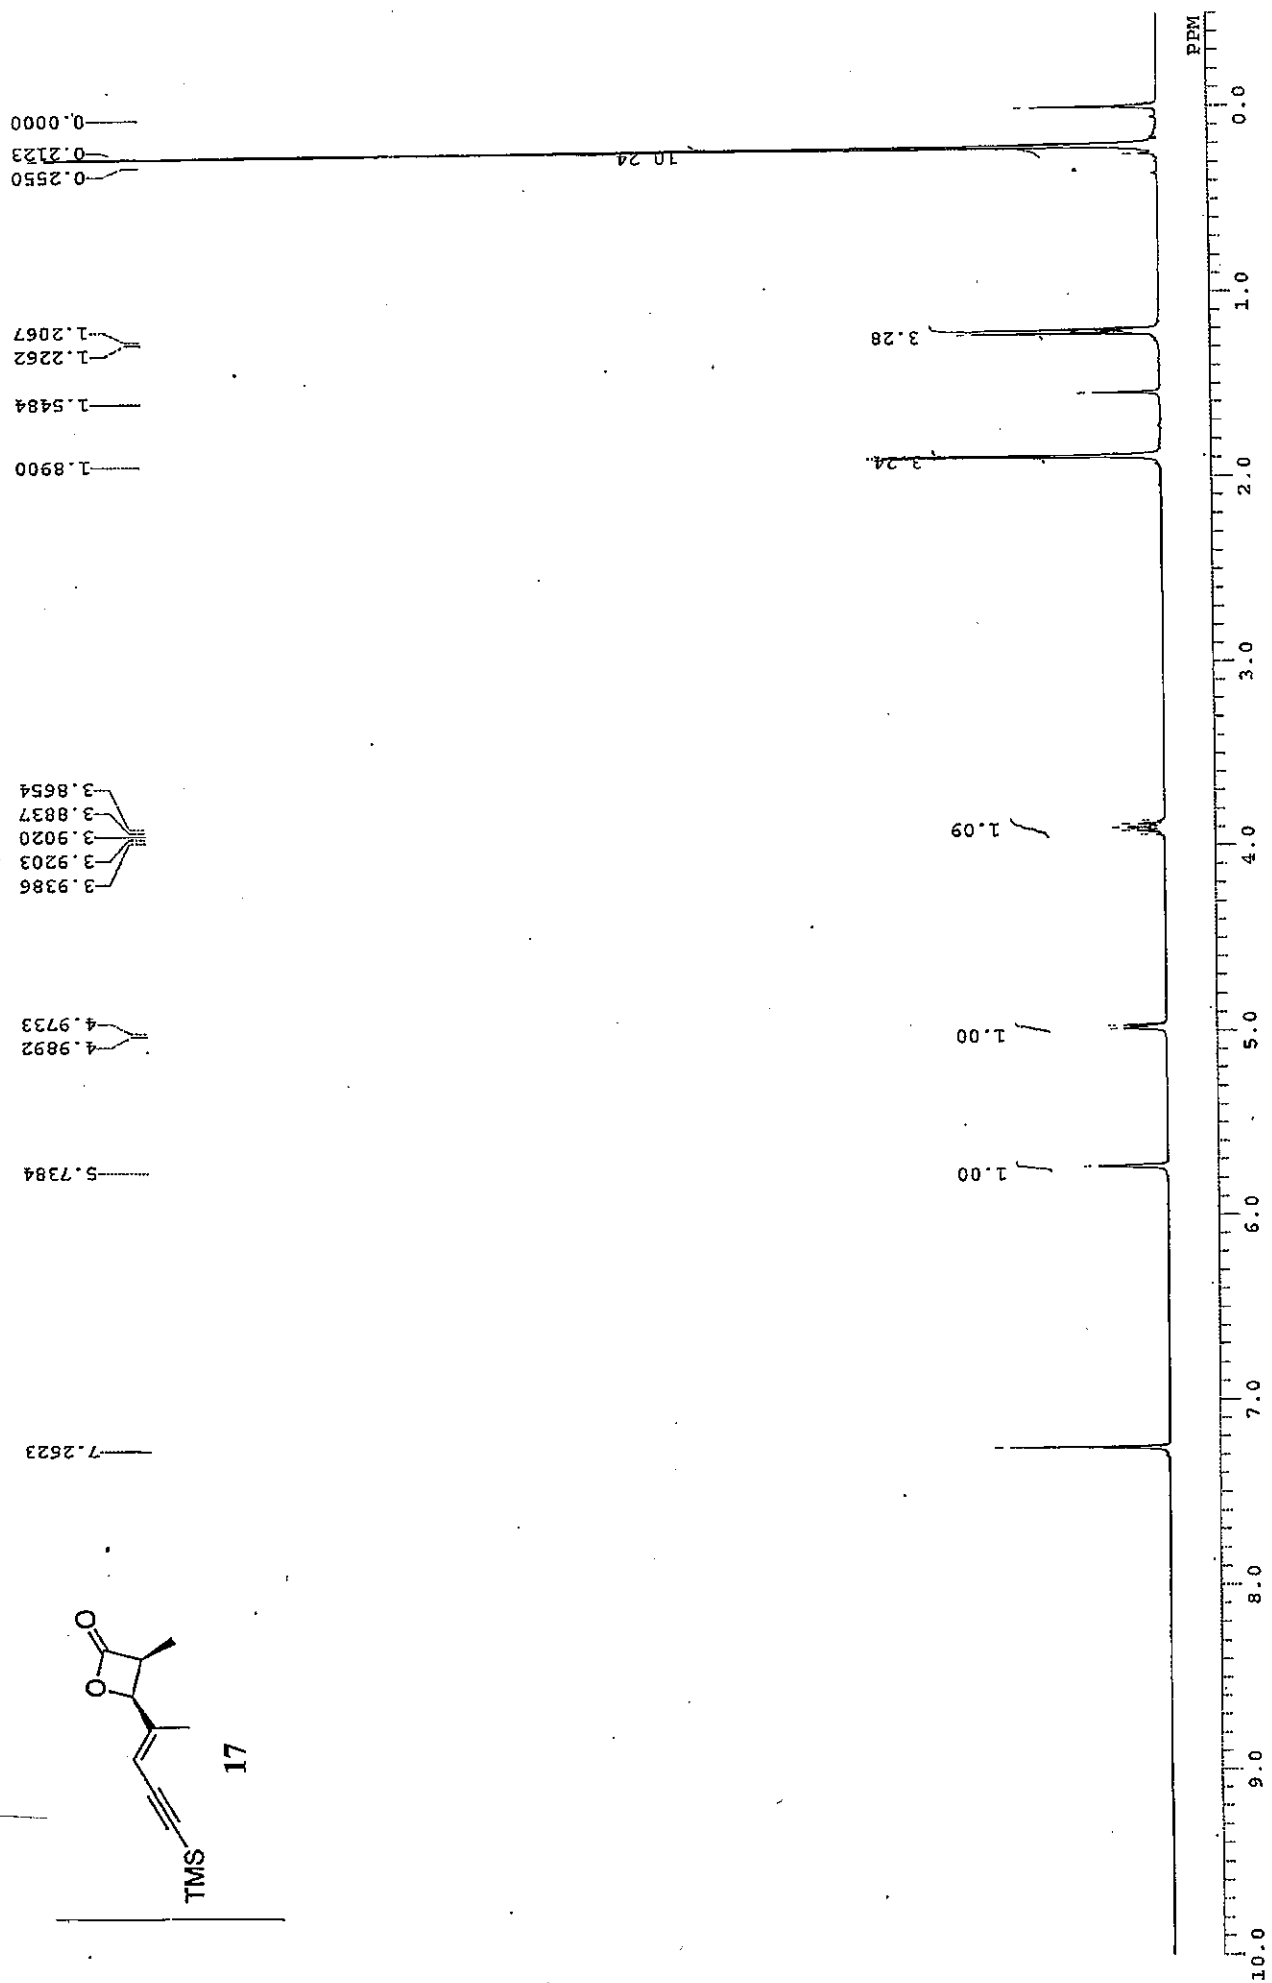



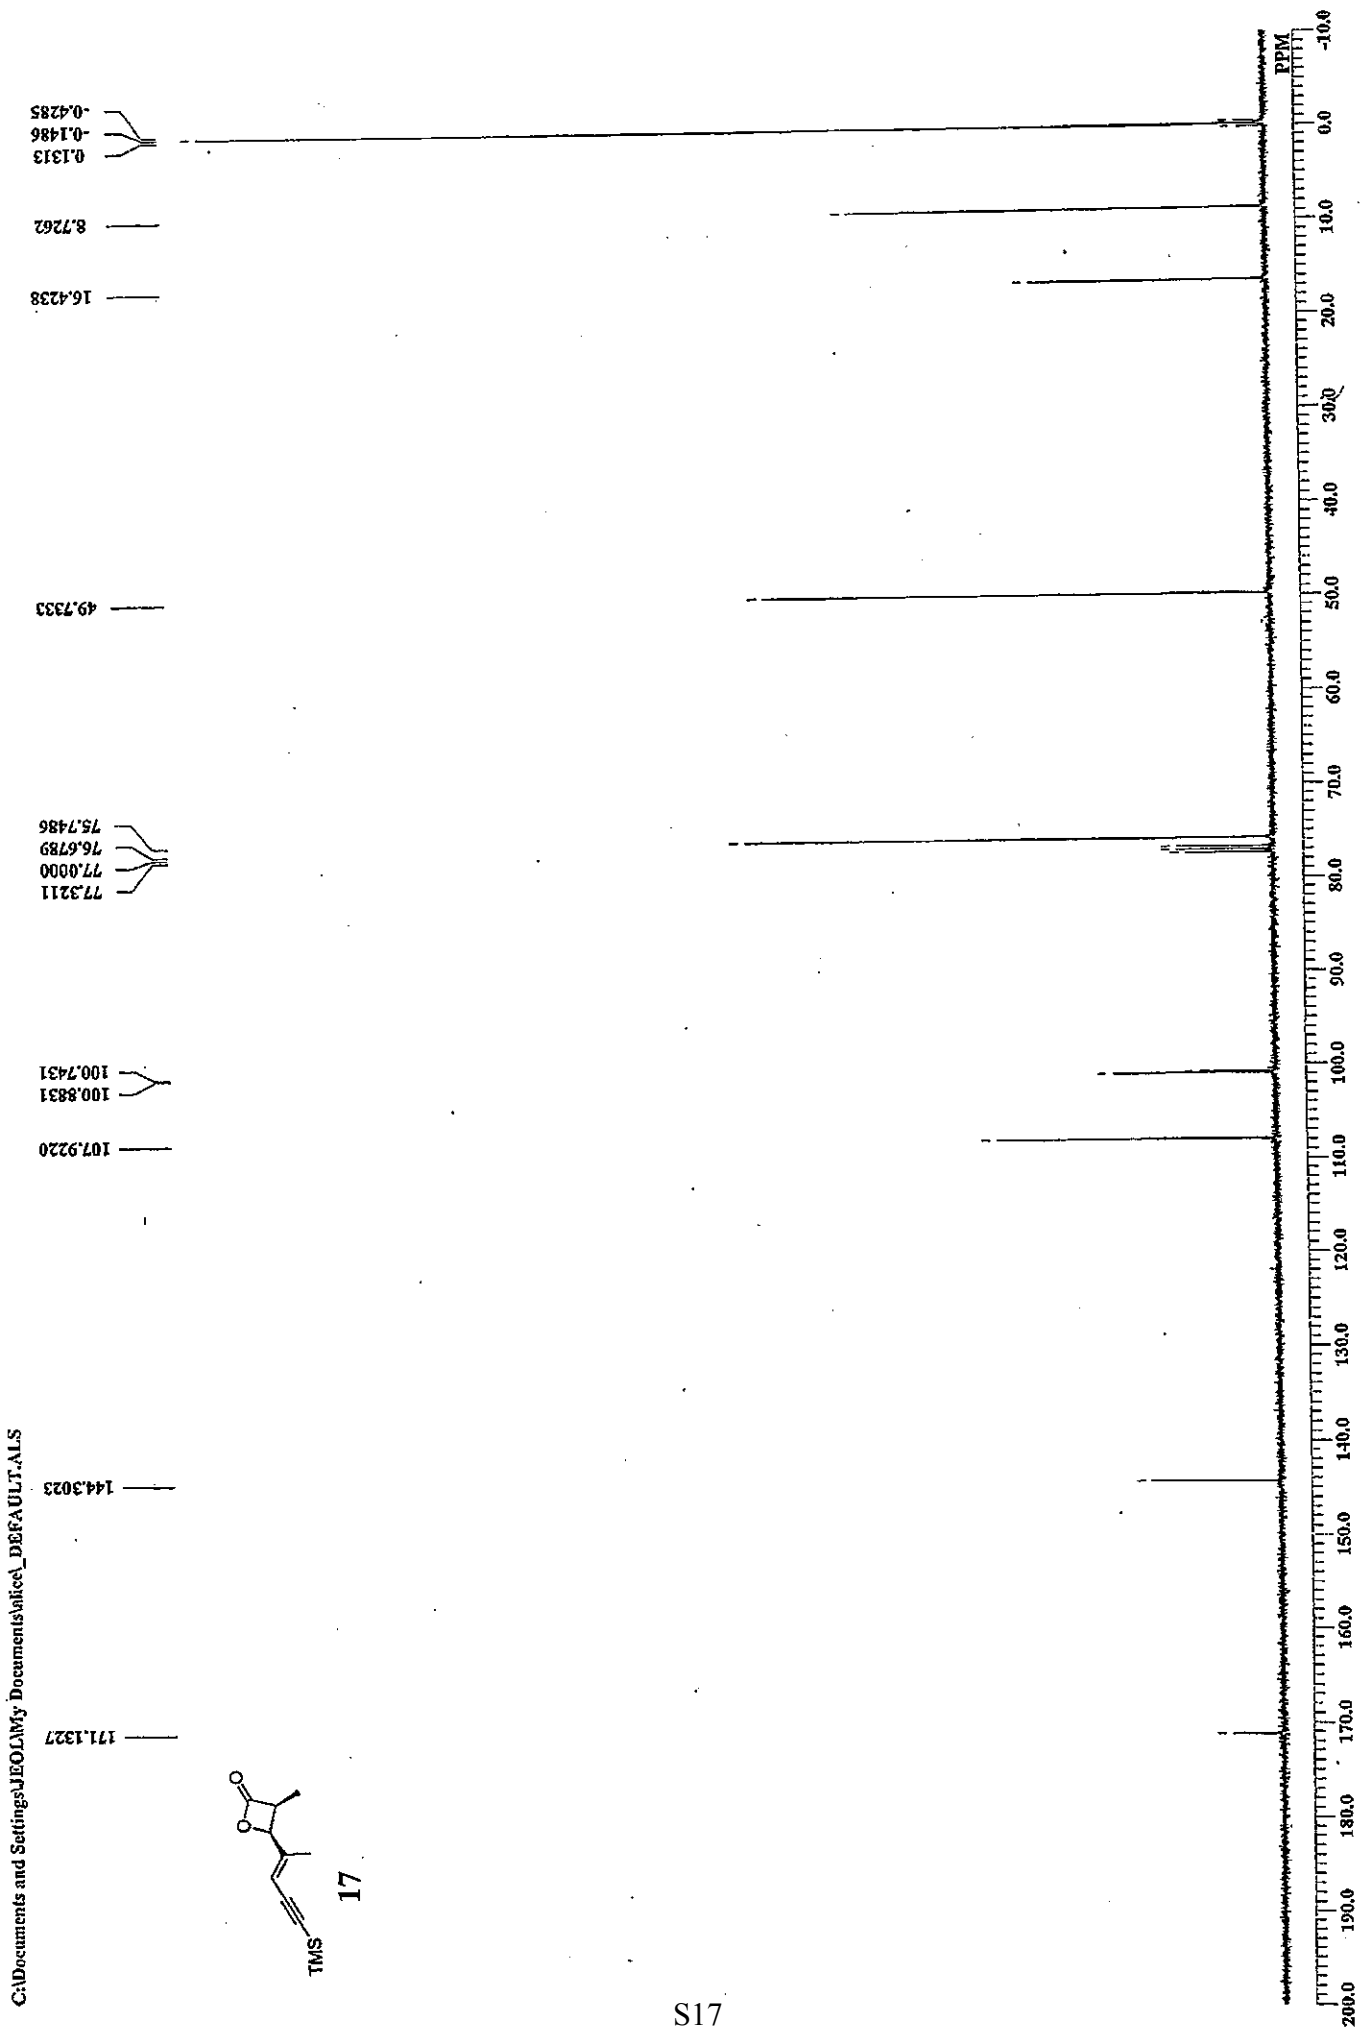

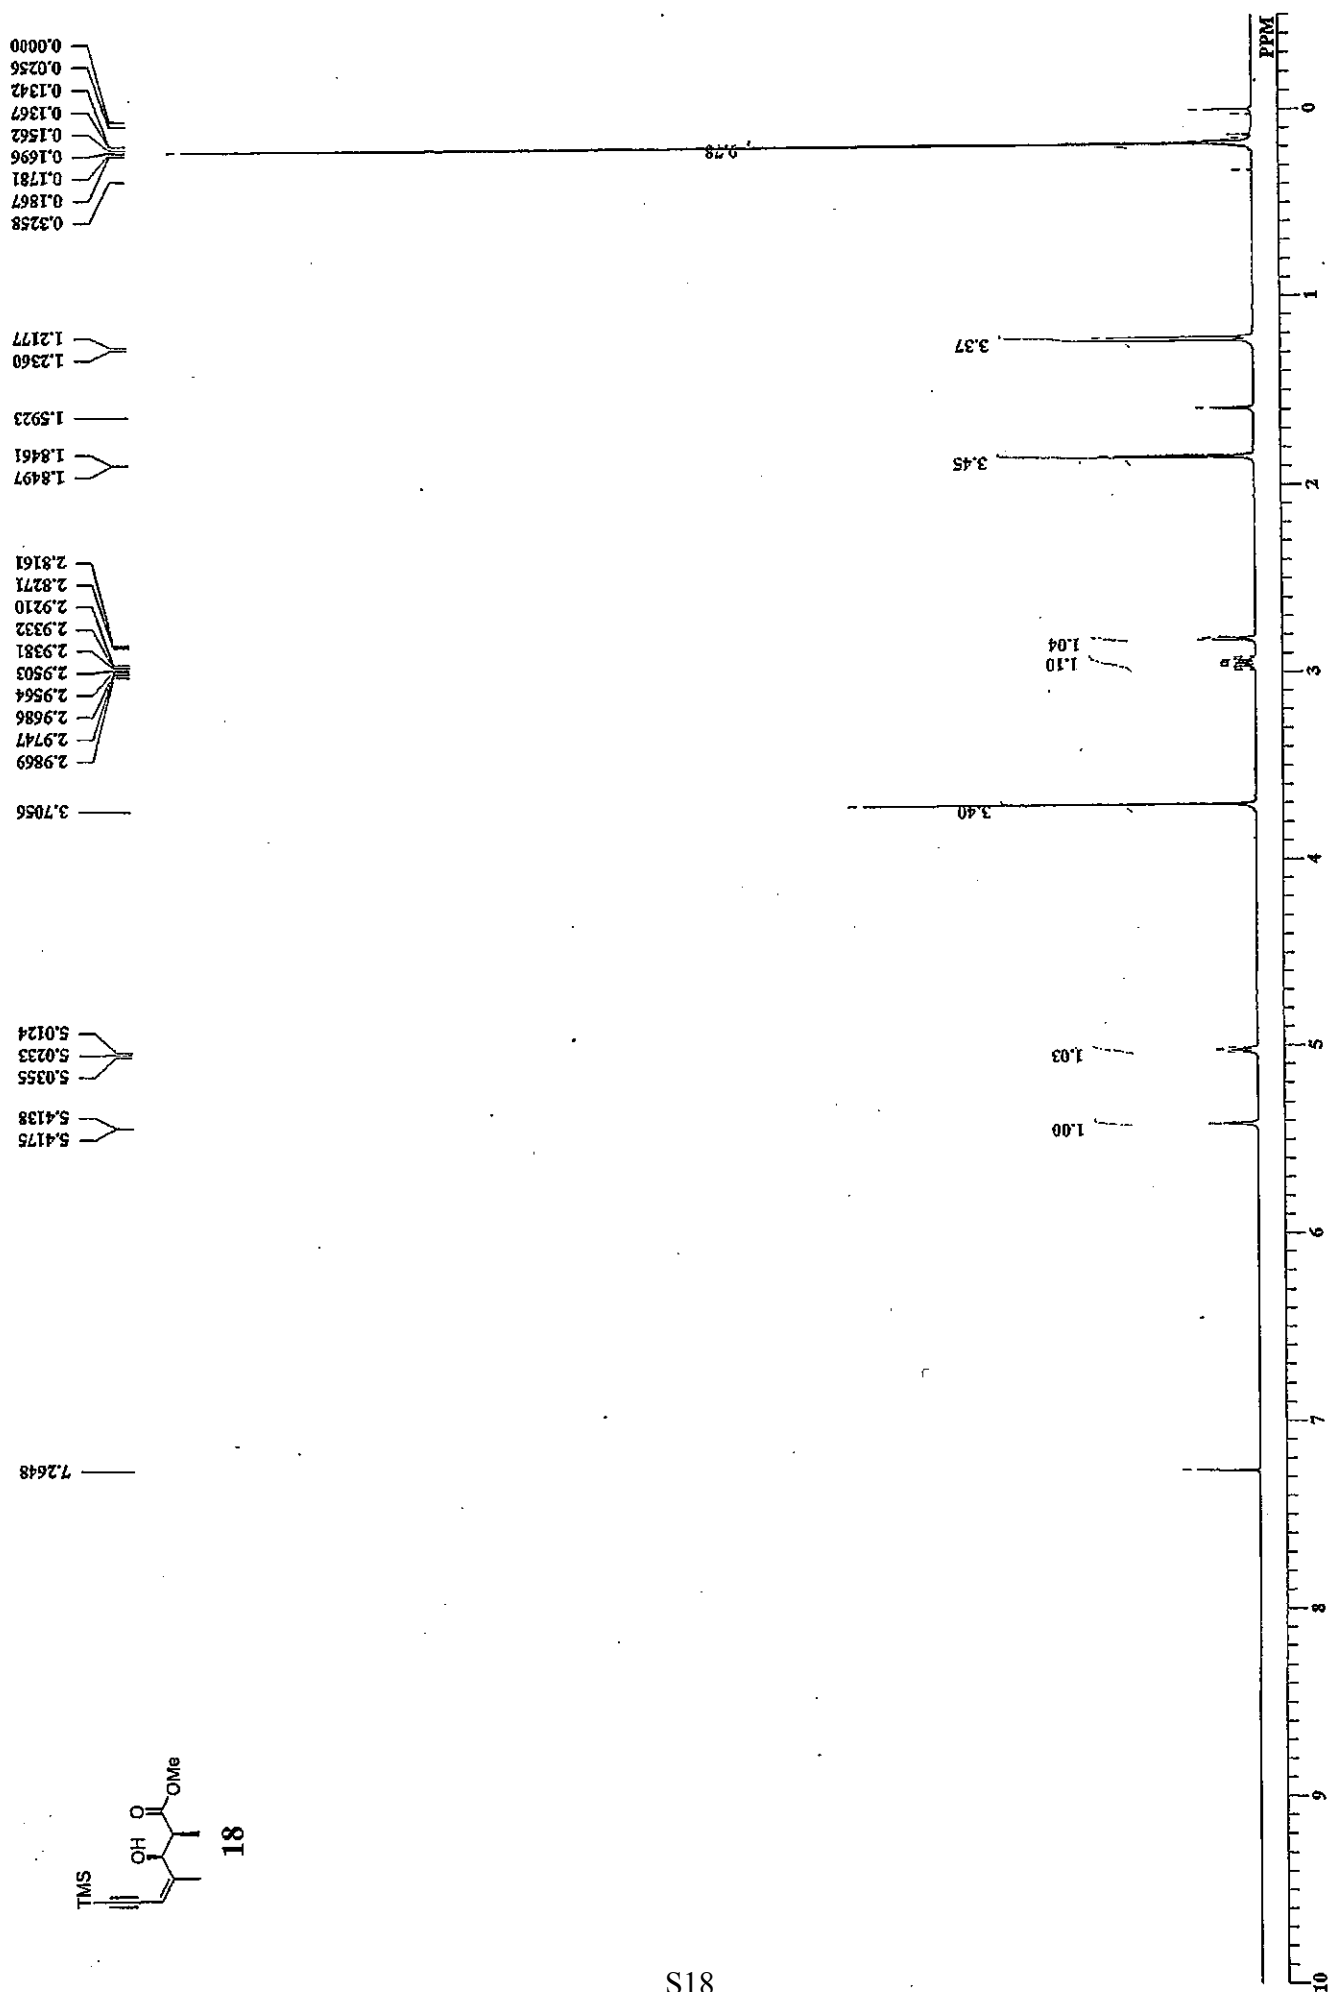

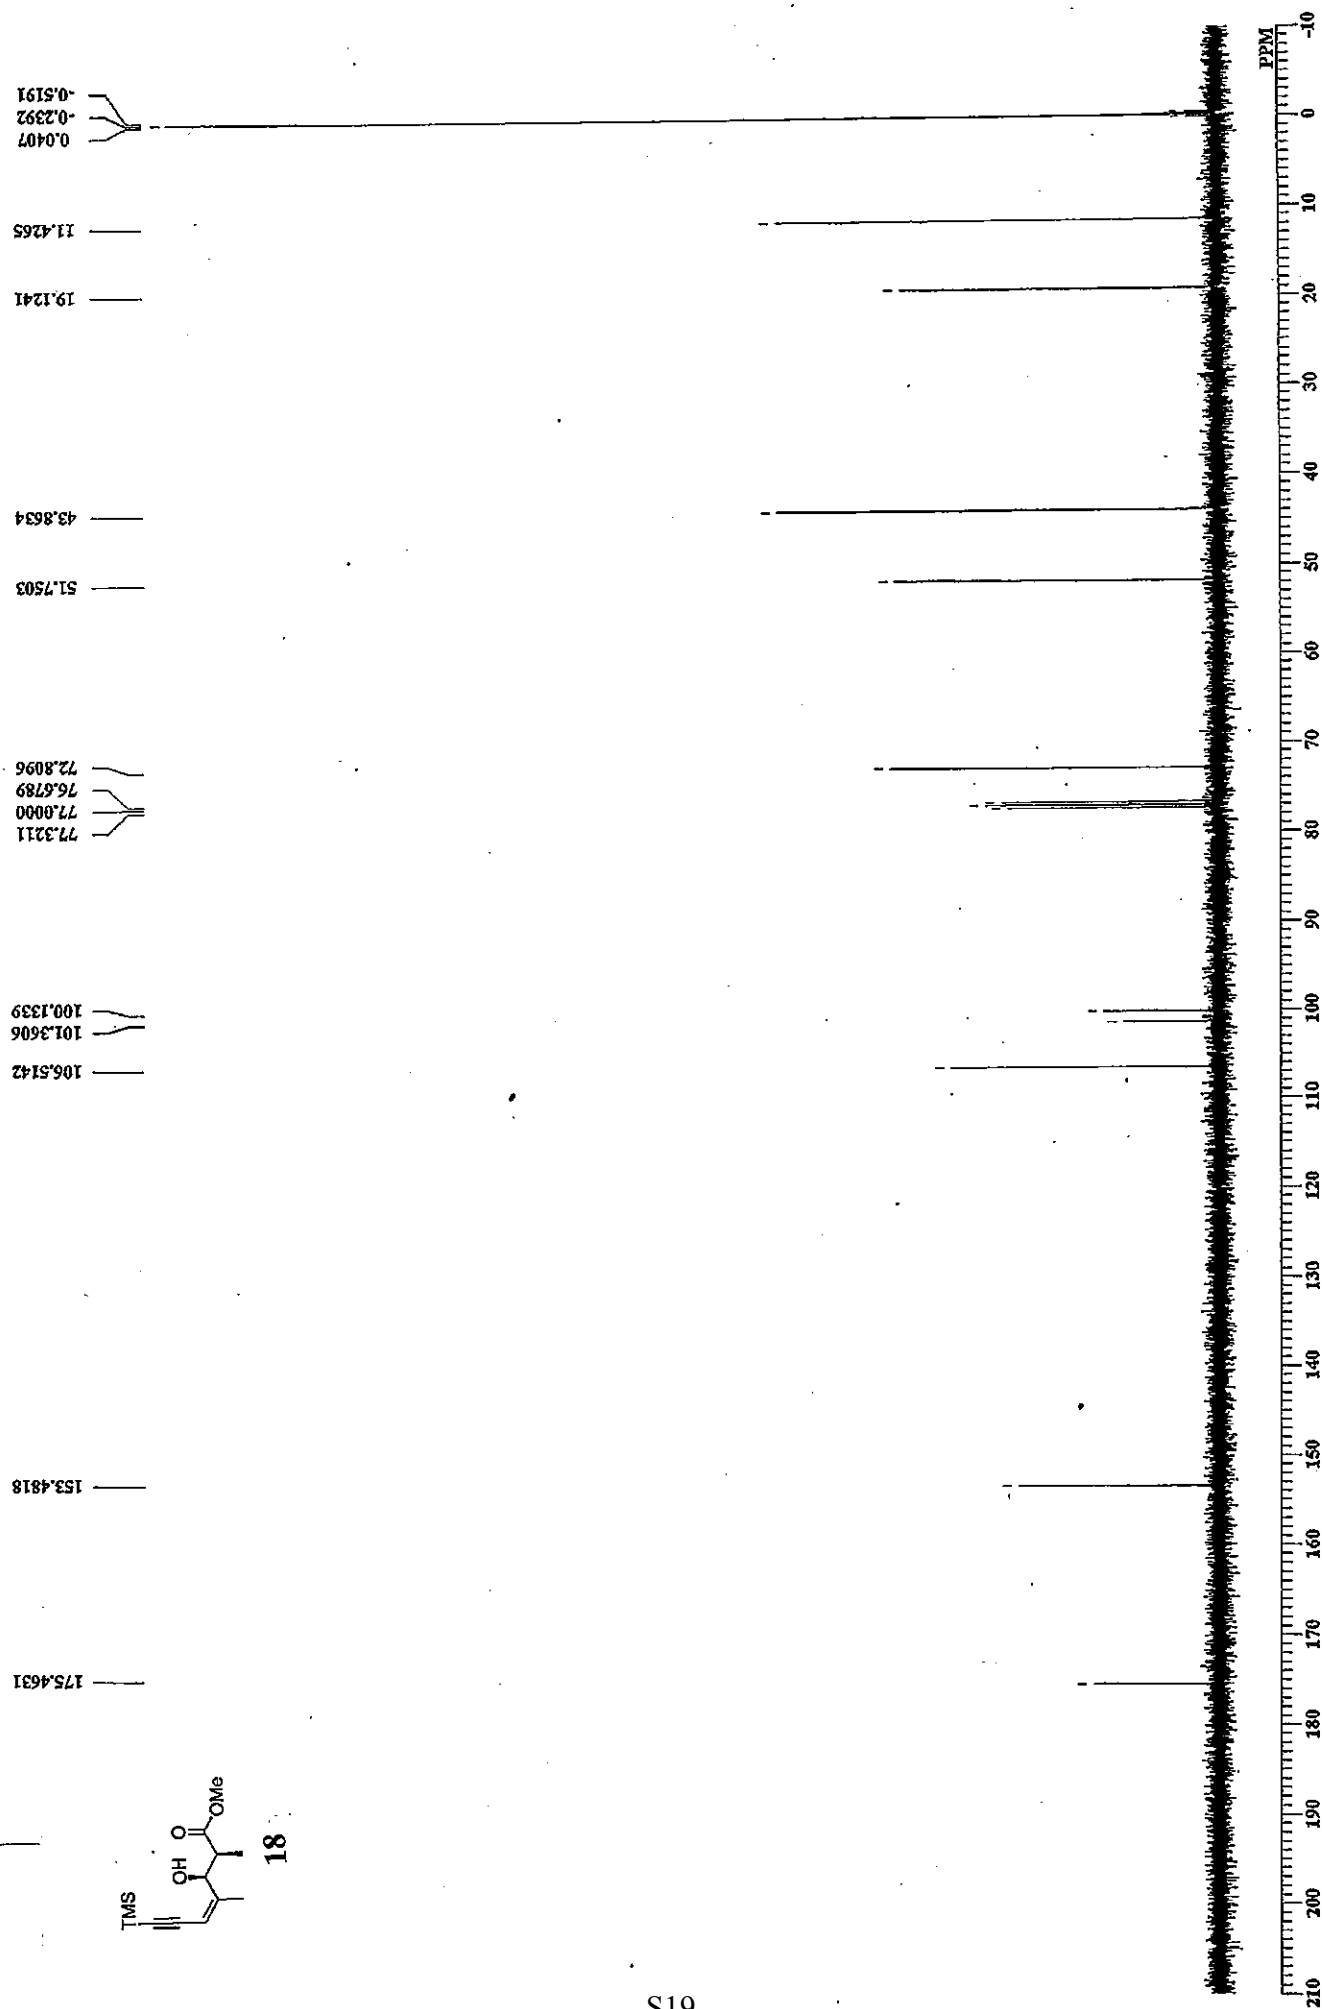

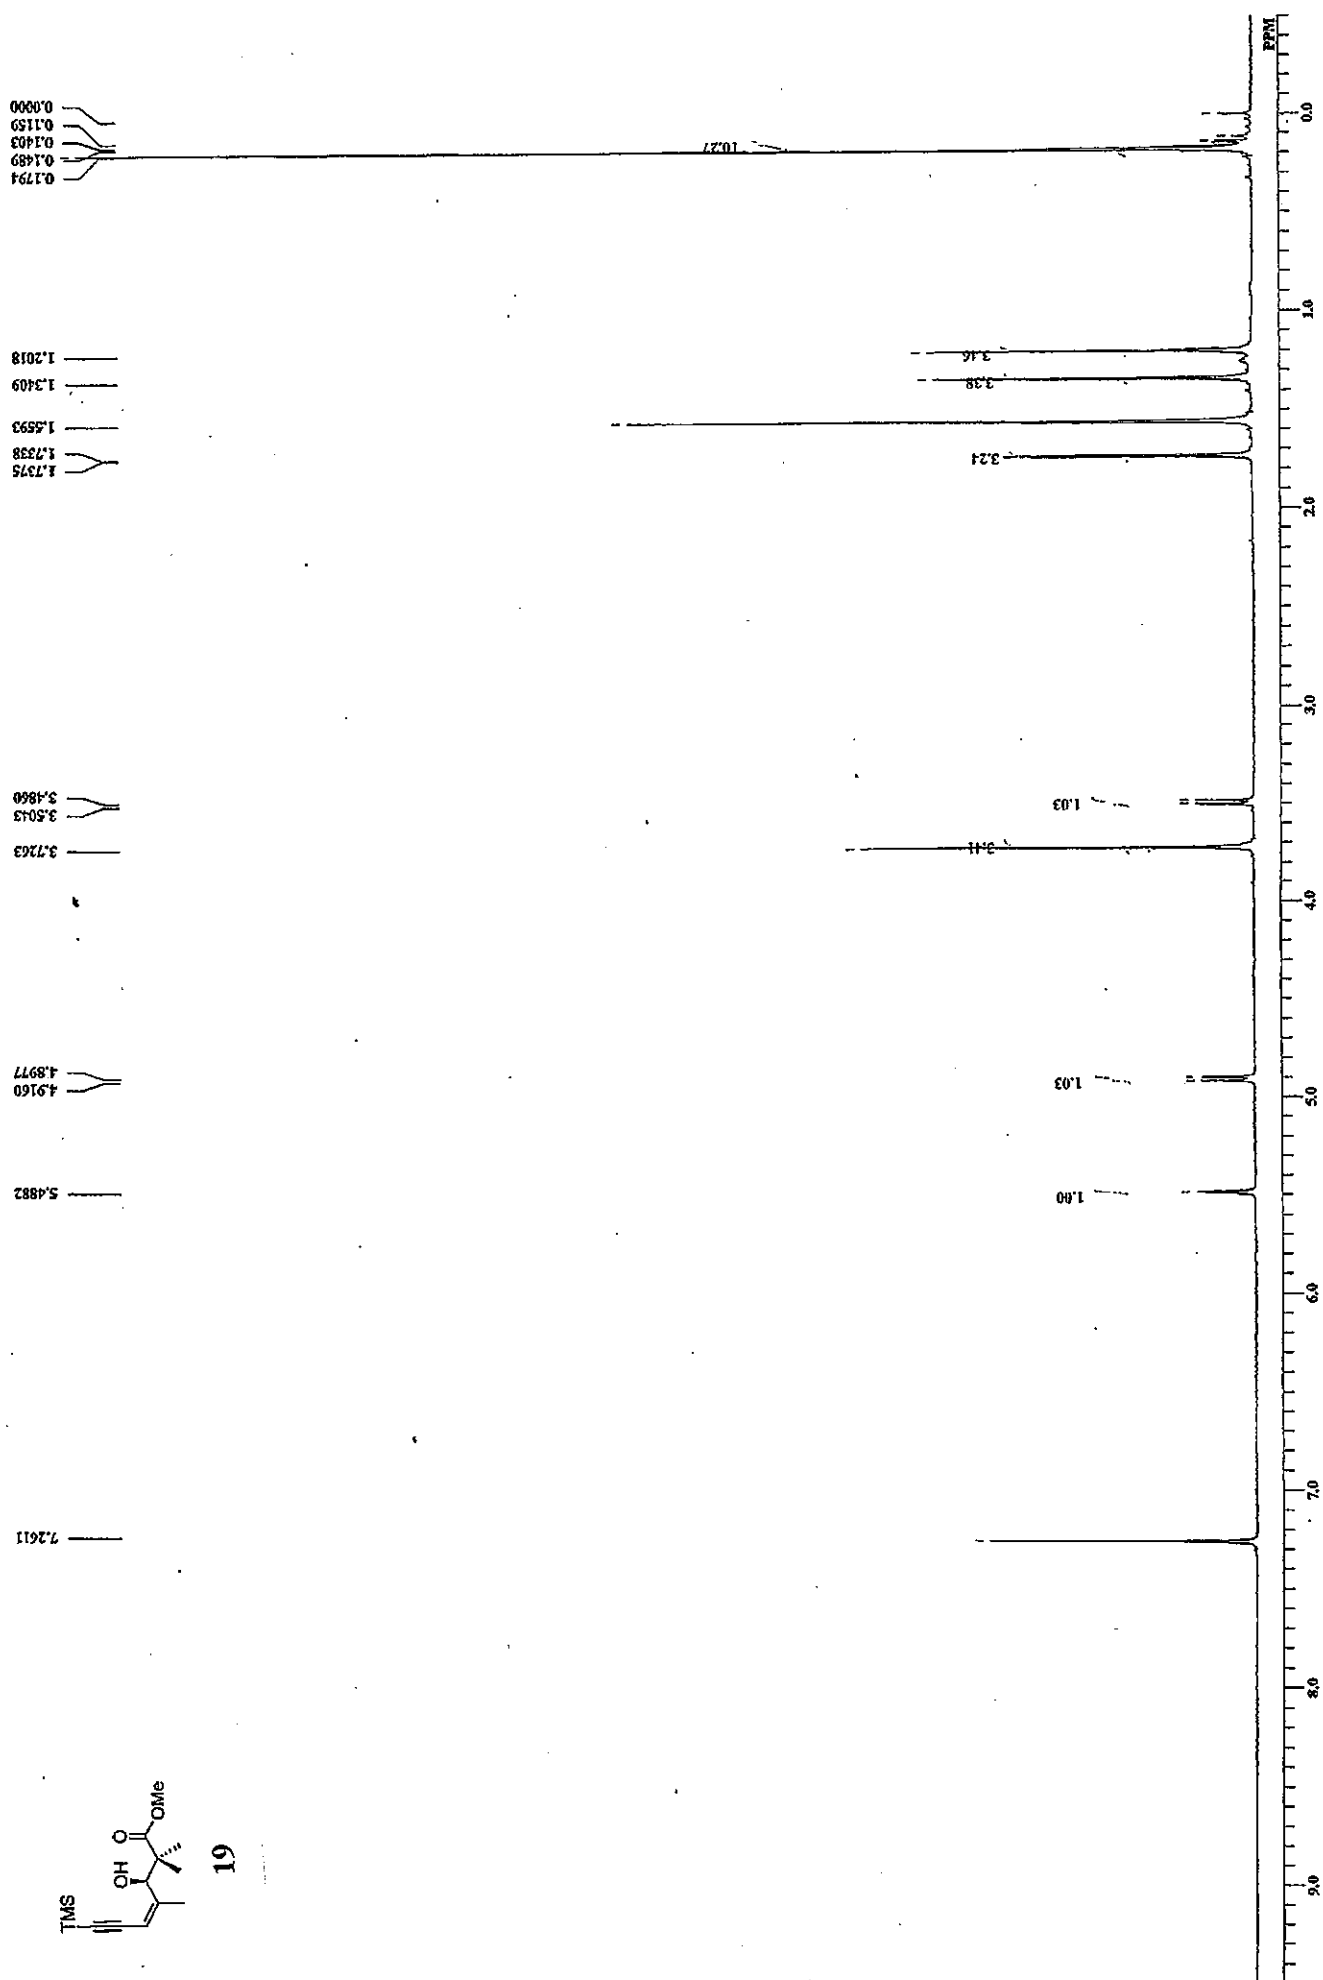

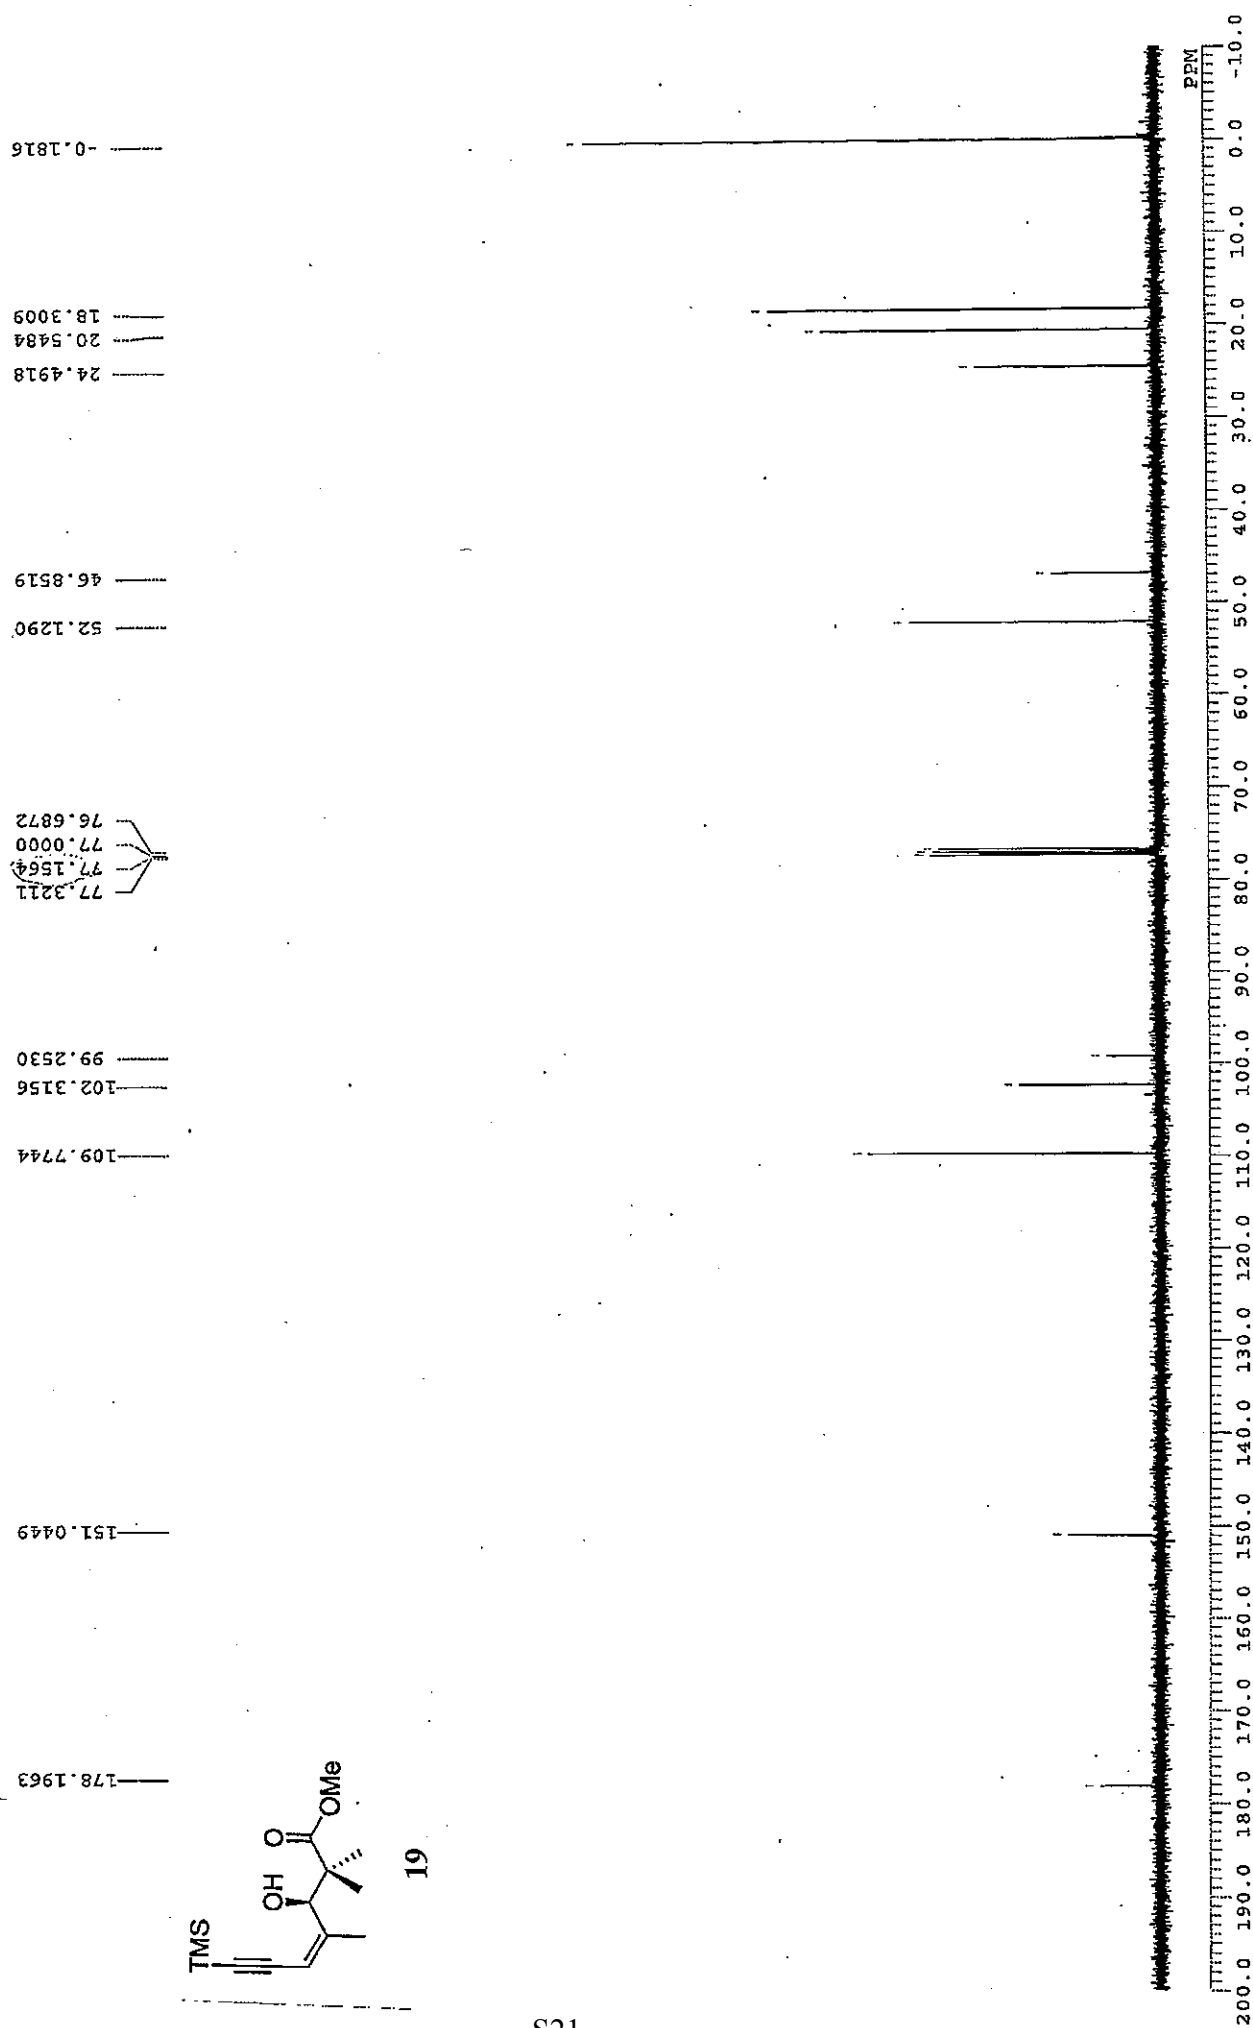

DEFAULT.ALS  
2-137-1  
Tue Sep 5 13:01:41 2009  
300  
1H  
NON  
399.65 MHz  
124.40 KHz  
10500.00 Hz  
16384  
7992.01 Hz  
8  
2.0500 sec  
4.9500 sec  
7.00 msec  
1H  
26.4 c  
CDCl3  
6.00 ppm  
0.14 Hz  
19  
RGAIN

BTLE  
COMPT  
DATIM  
ORNUC  
EXMOD  
ORFQ  
ORSET  
ORBIN  
POINT  
FREQU  
SCANS  
ACQTM  
PD  
FWI  
IRNUC  
CTEMP  
SLVNT  
XREF  
HF  
RGAIN

1.2031  
1.2568  
1.3519  
1.5606  
1.7460  
1.7485

3.0748  
3.0809

3.5726  
3.5921  
3.7300

4.8684  
4.8867

5.4687

7.2611

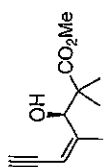

20

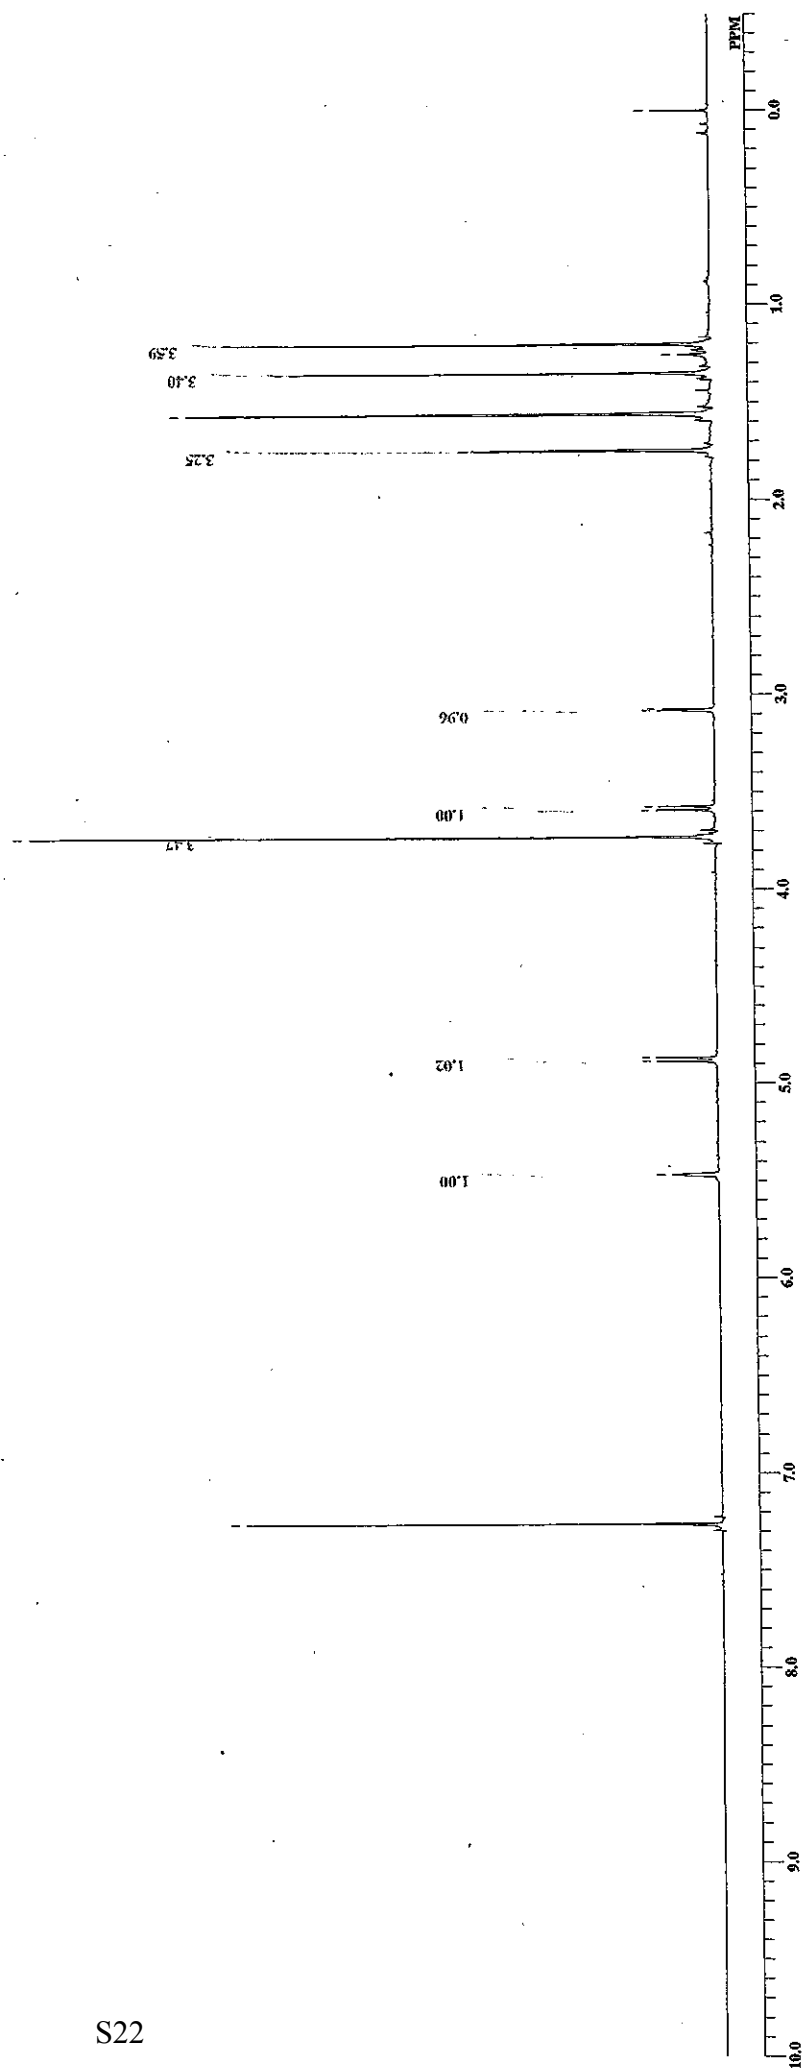

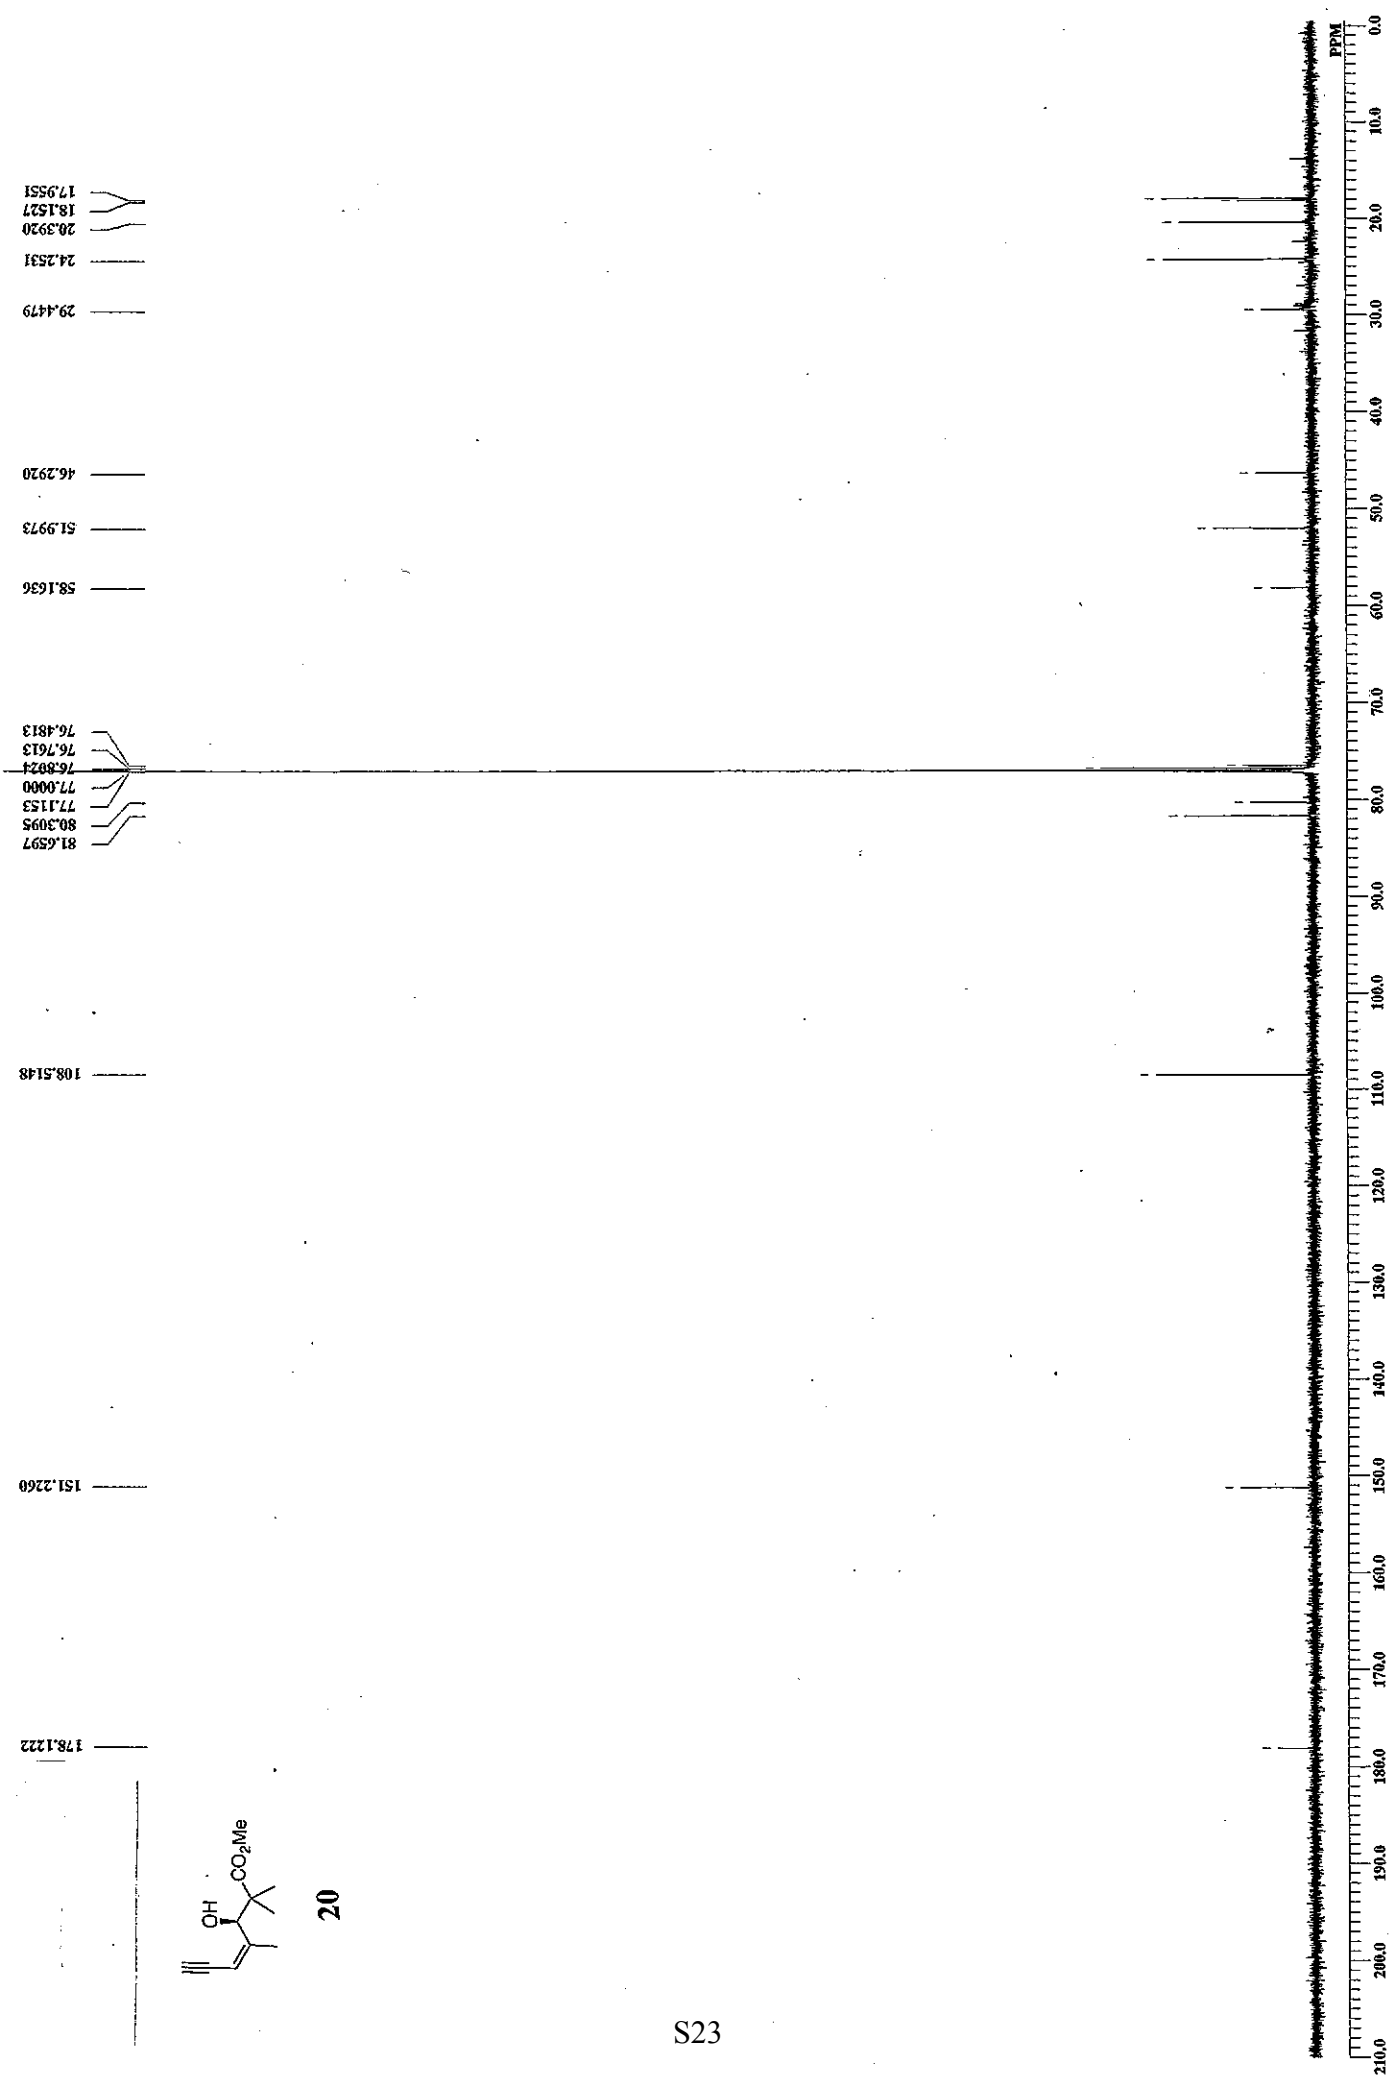

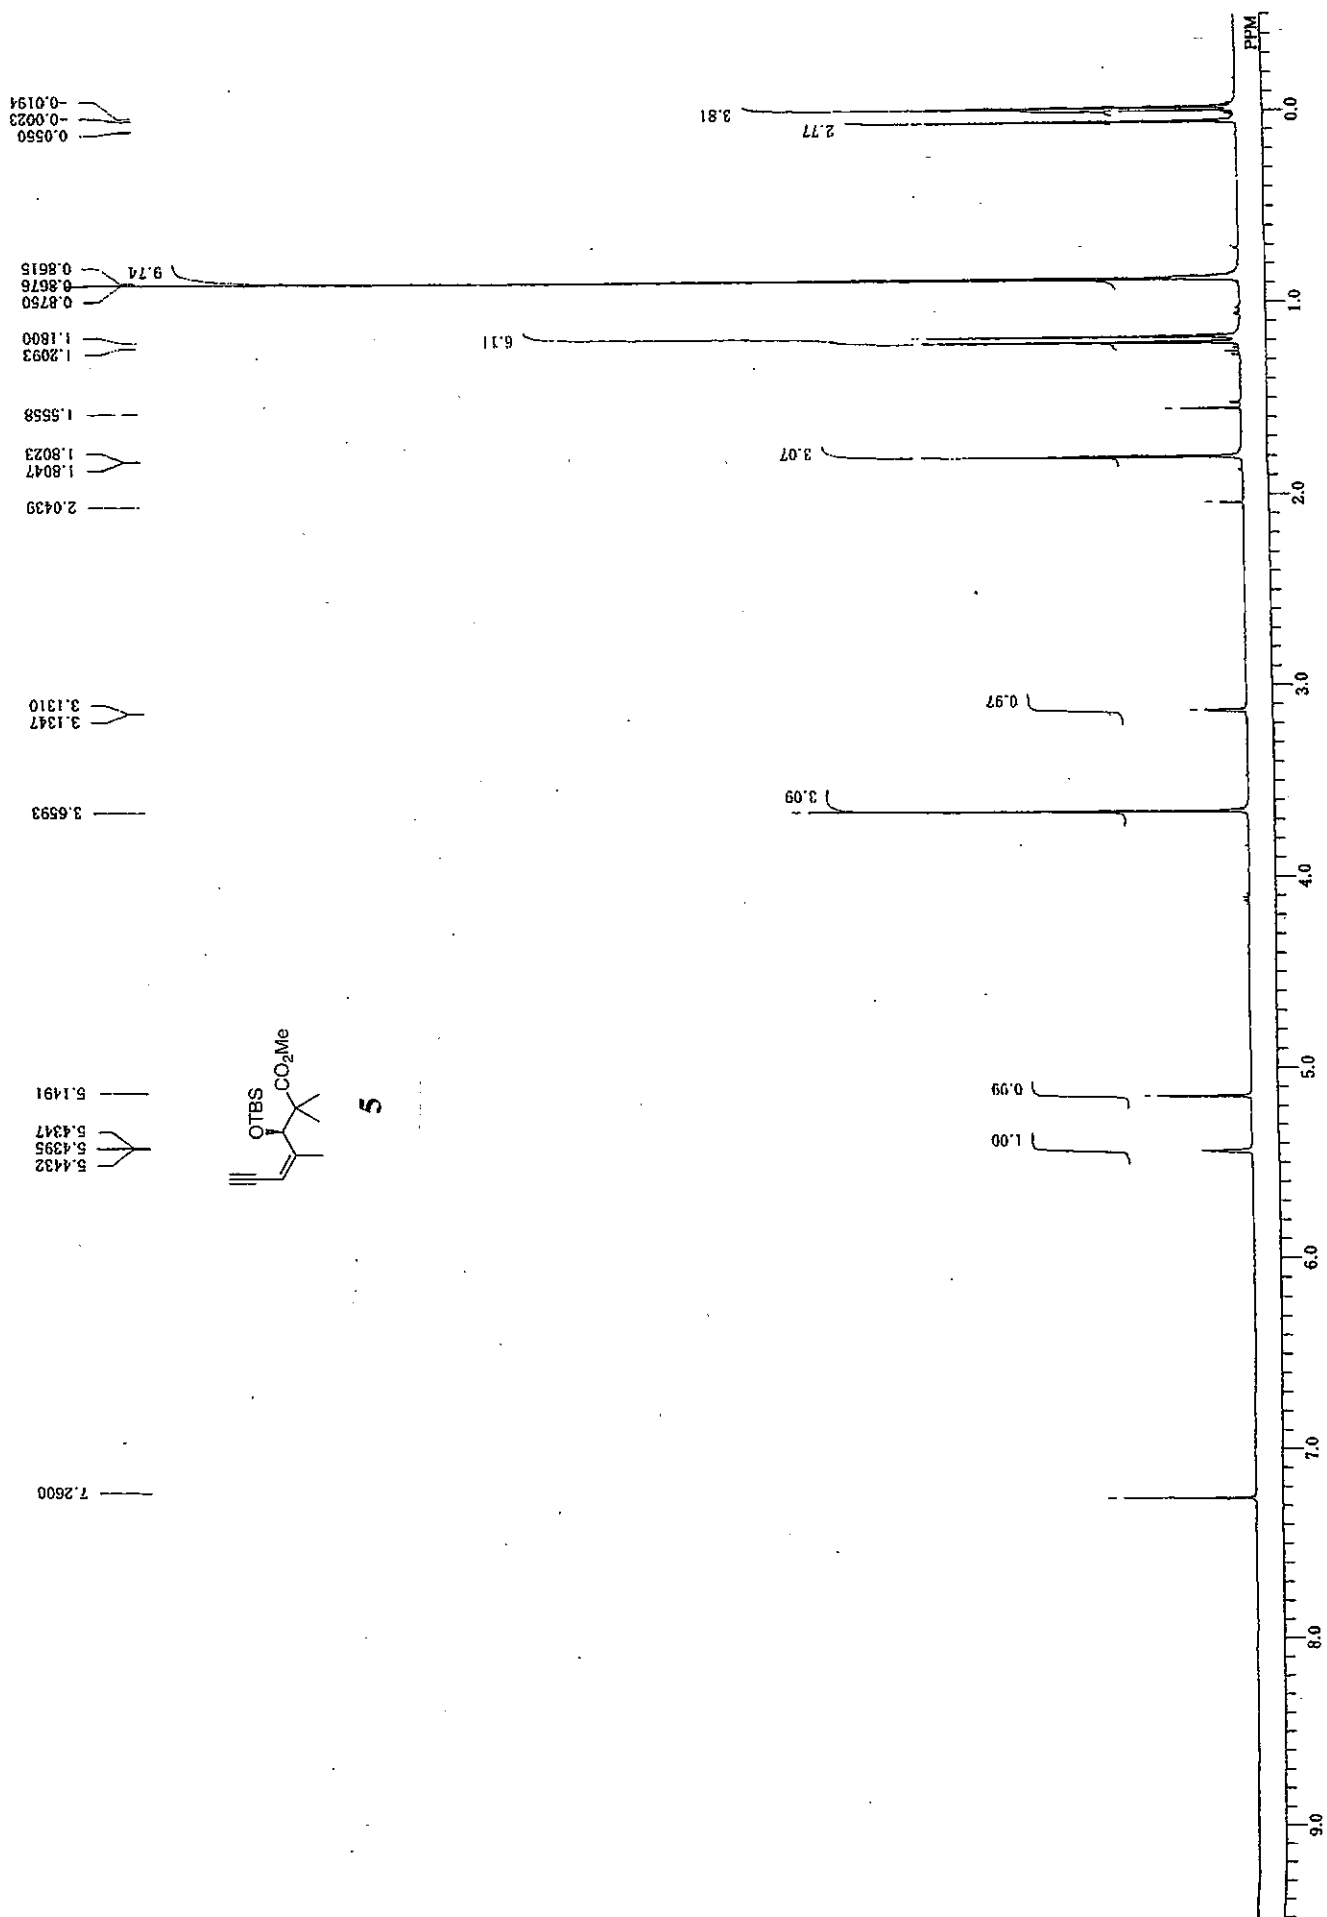



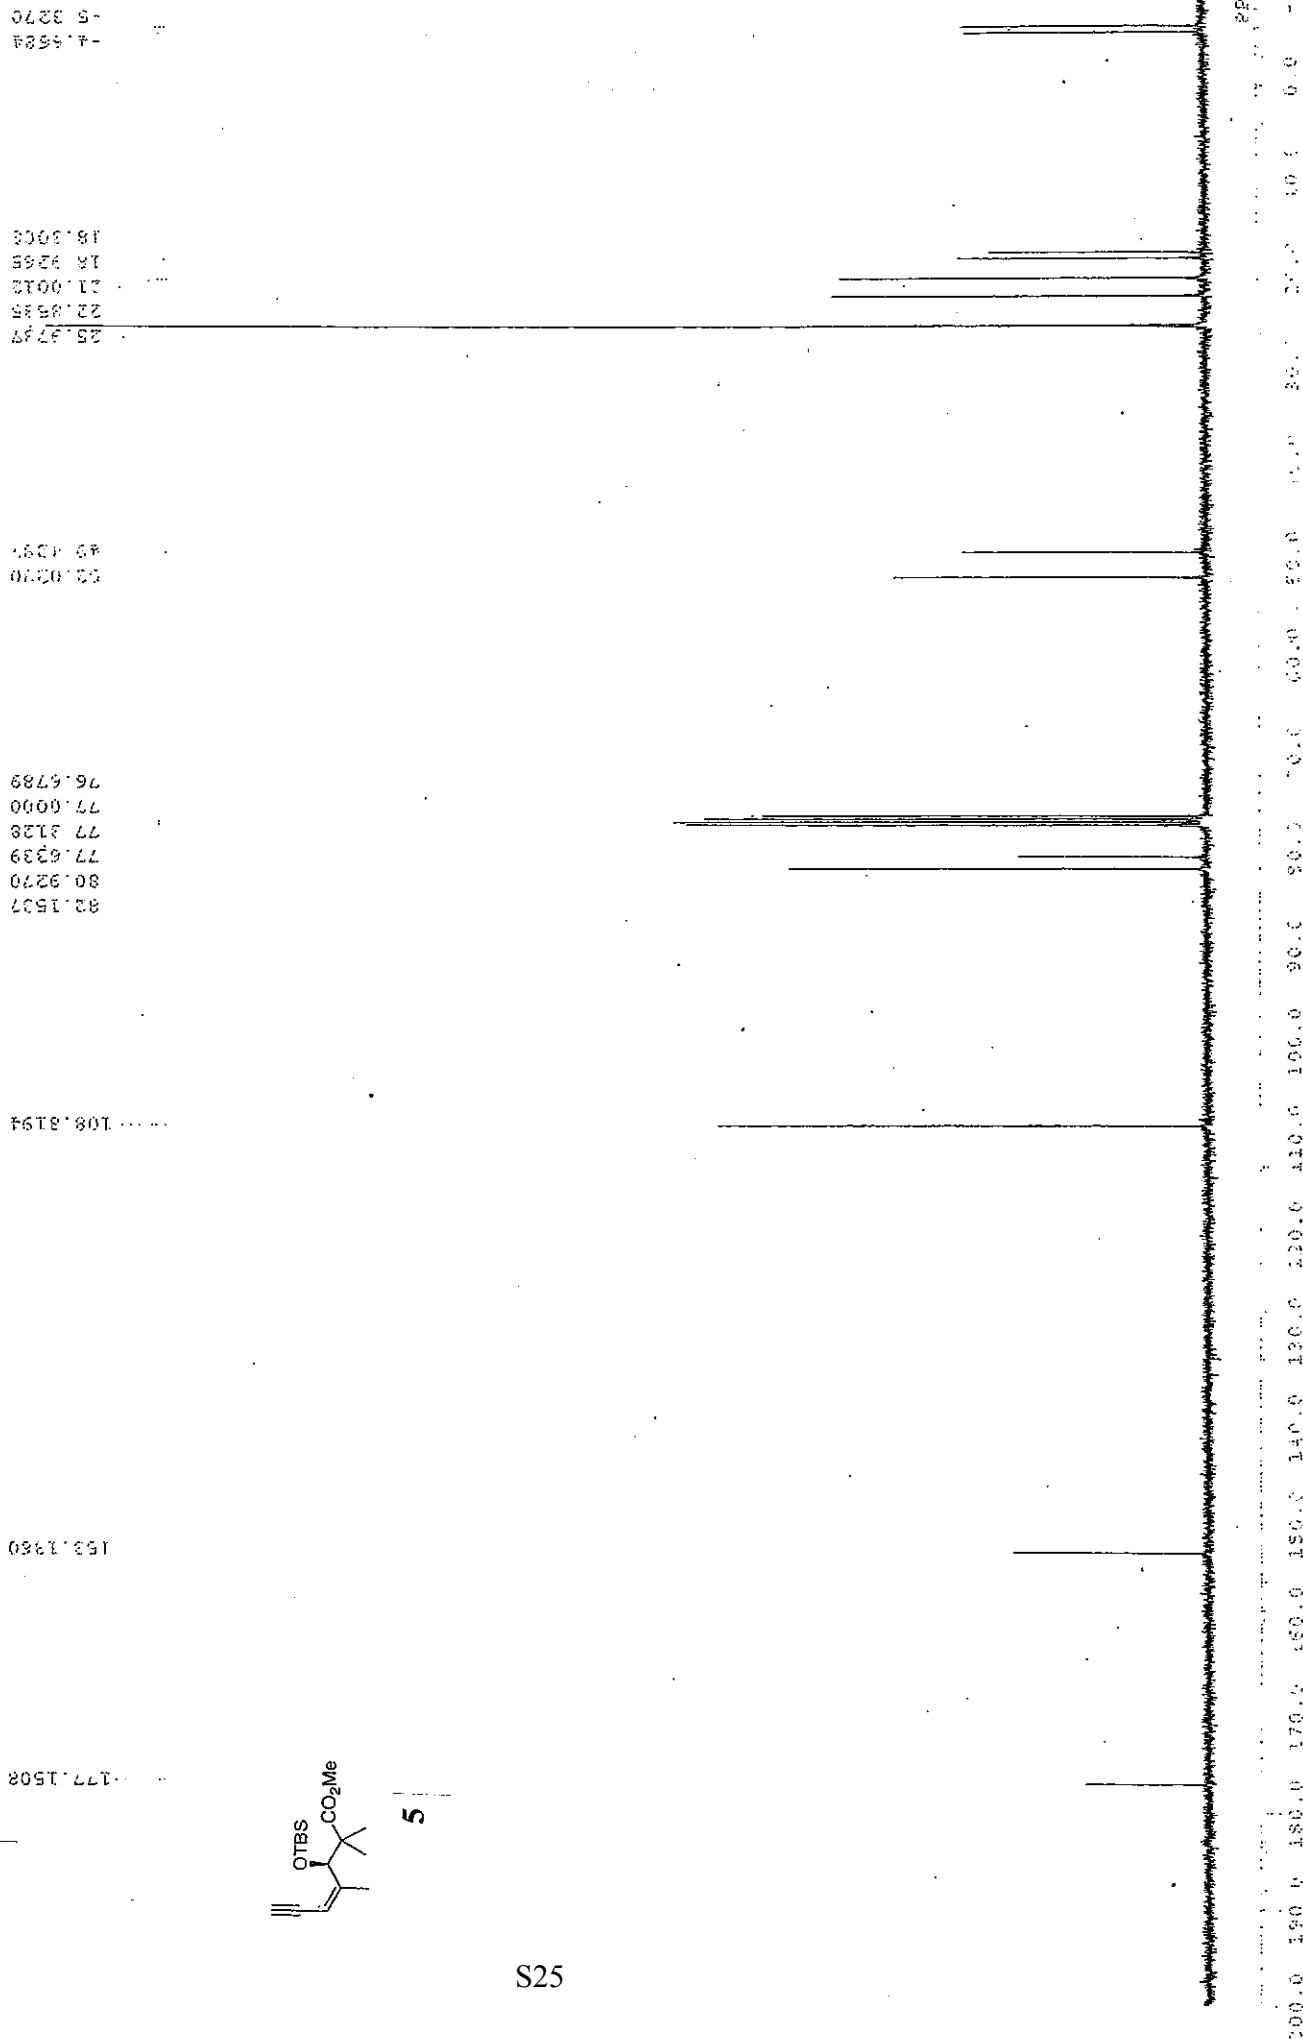

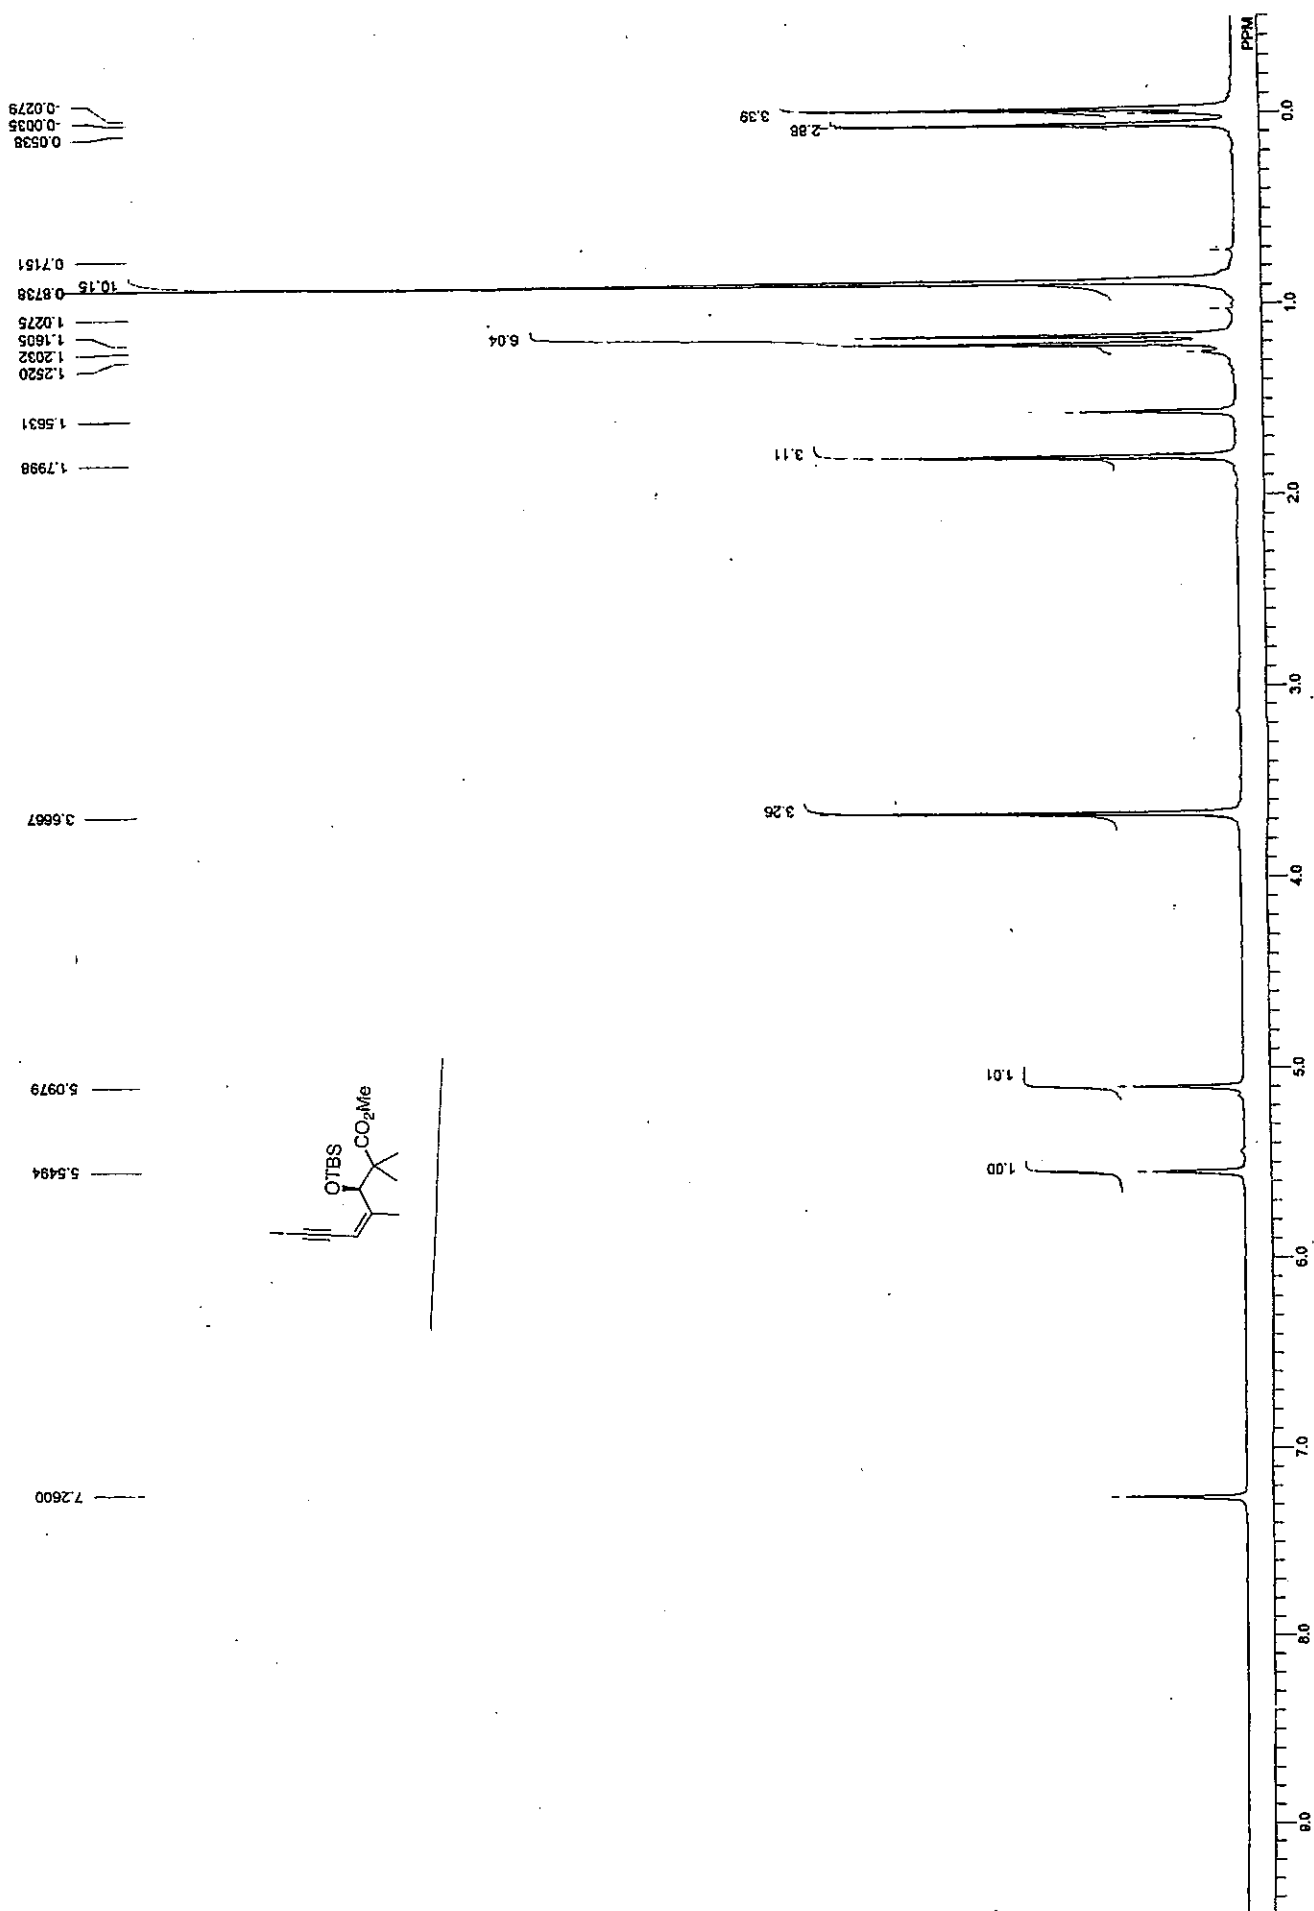

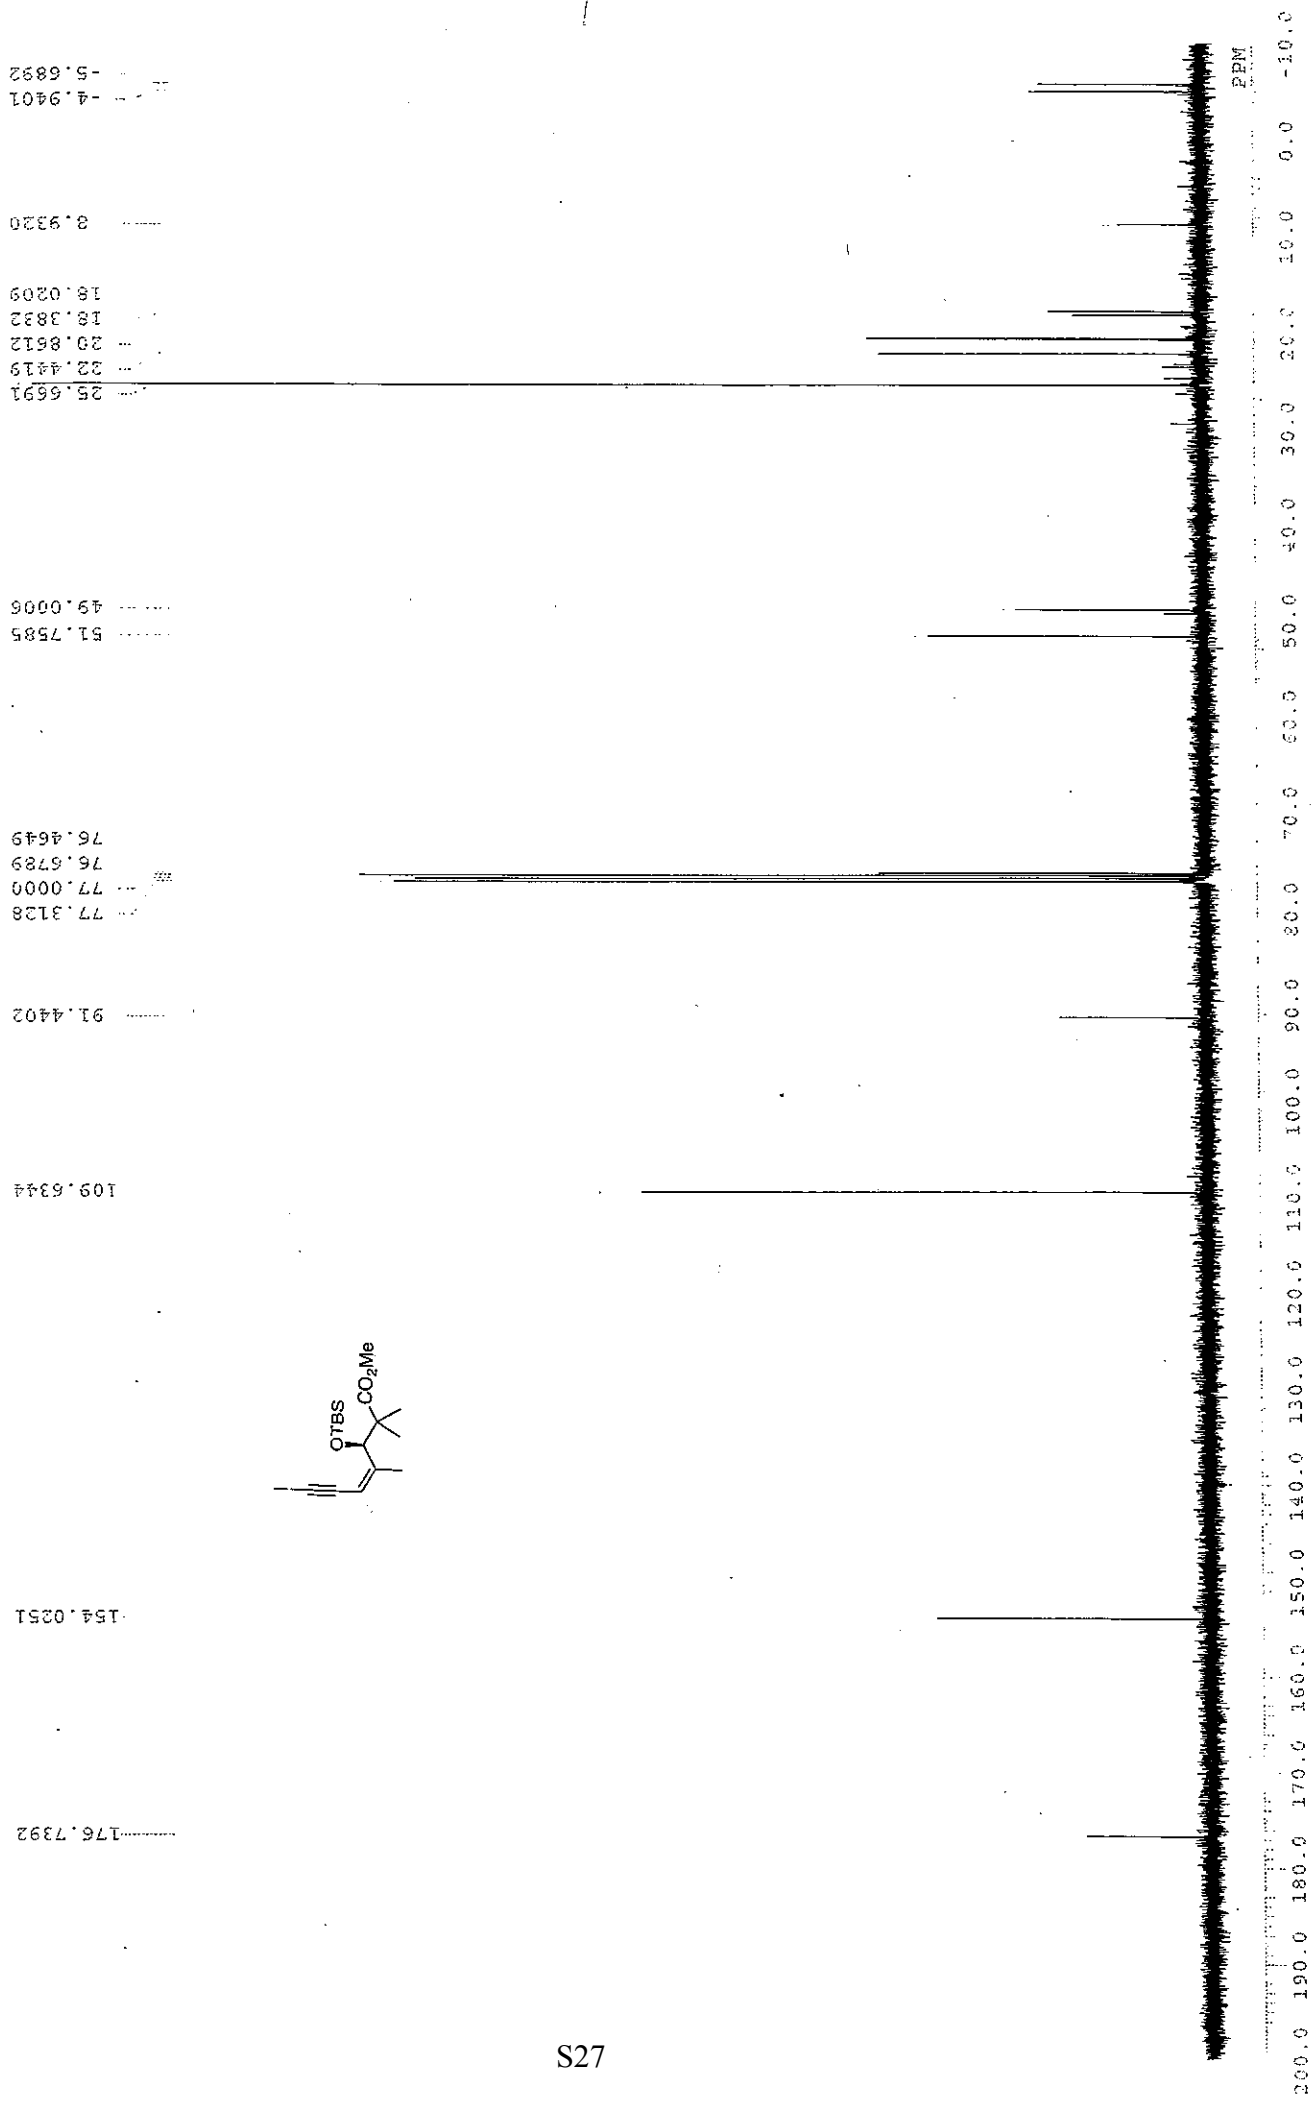

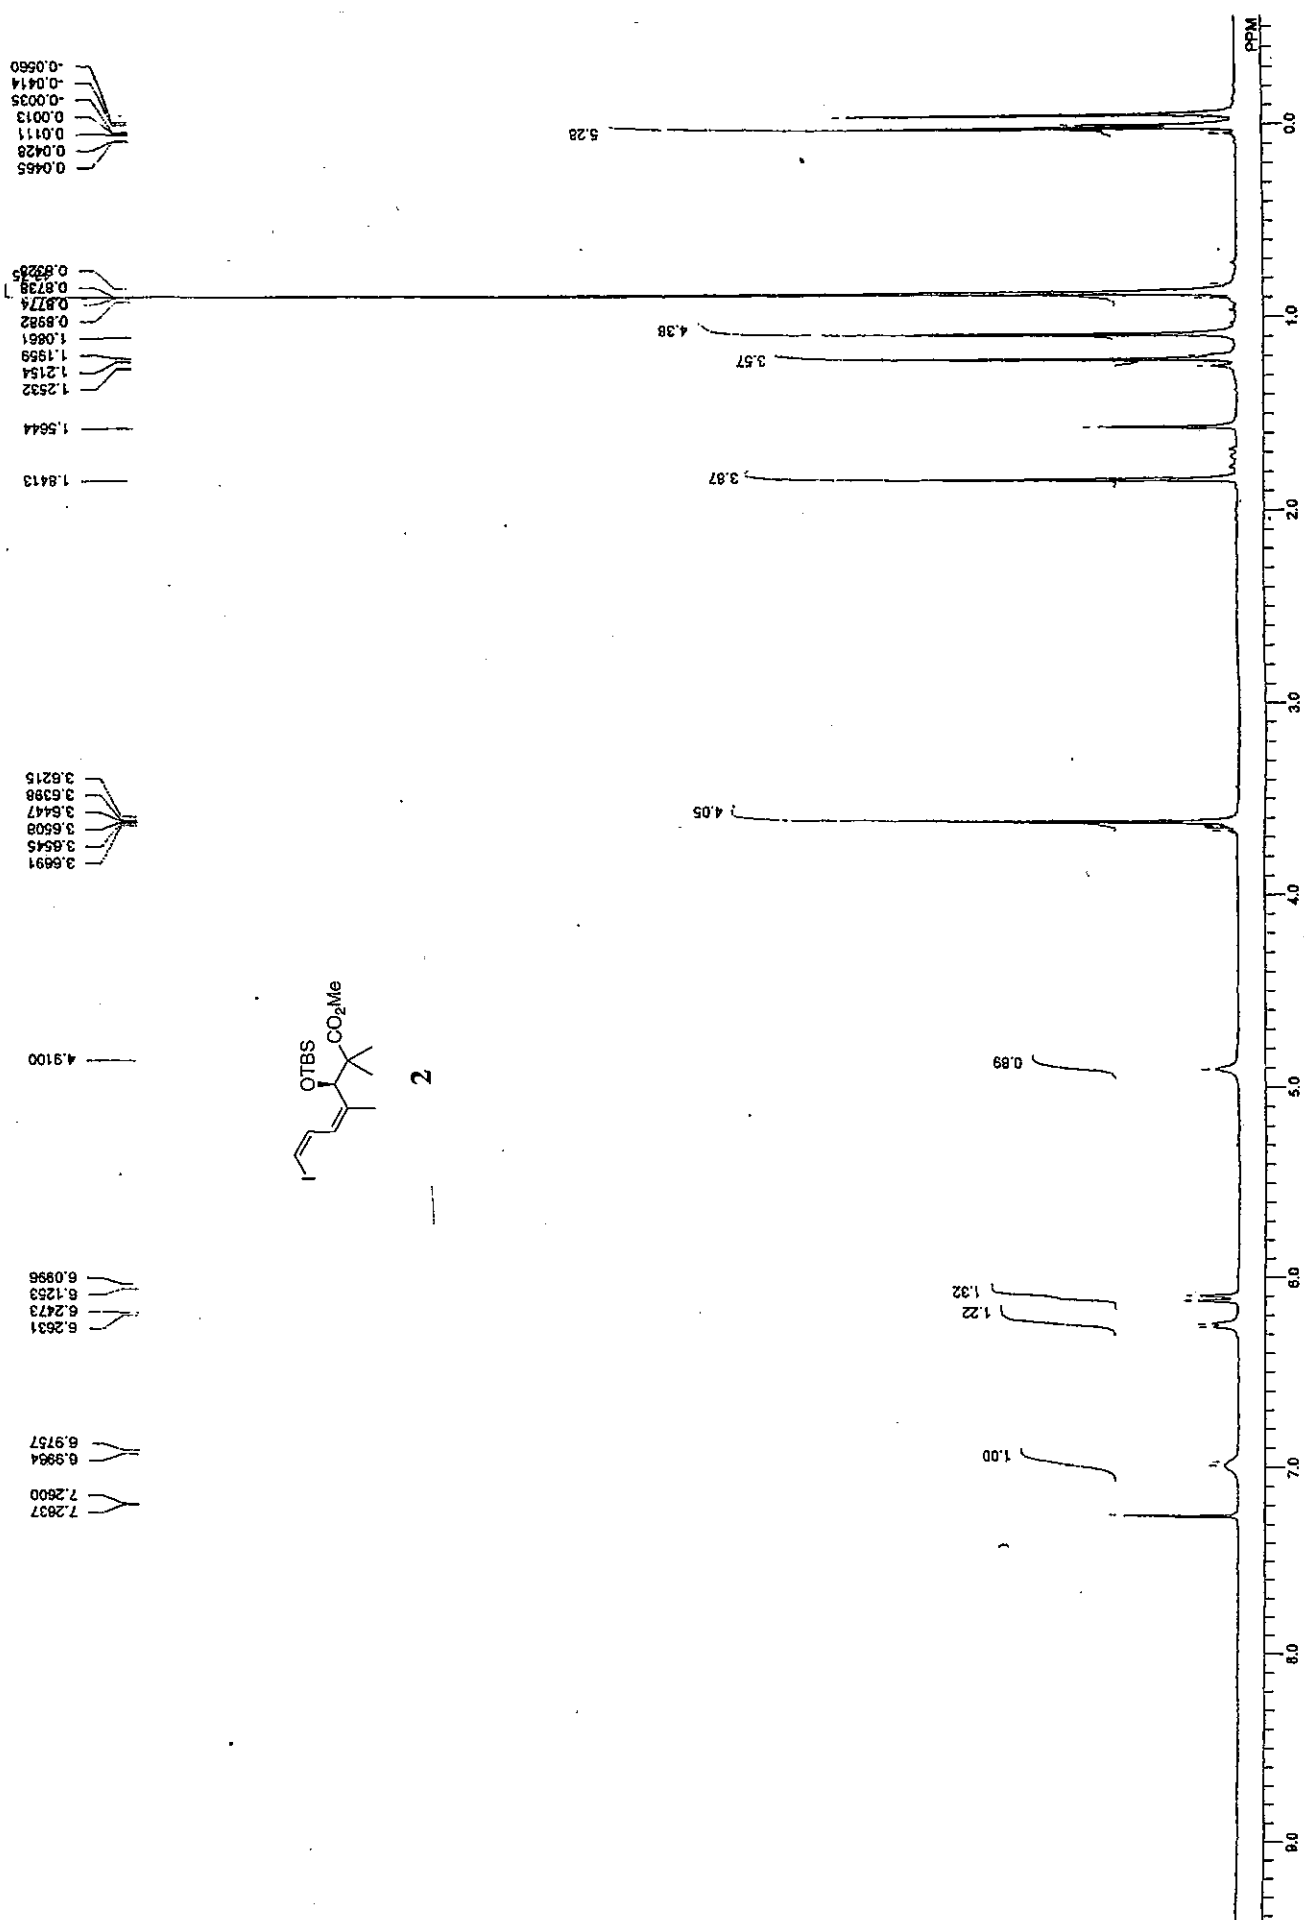

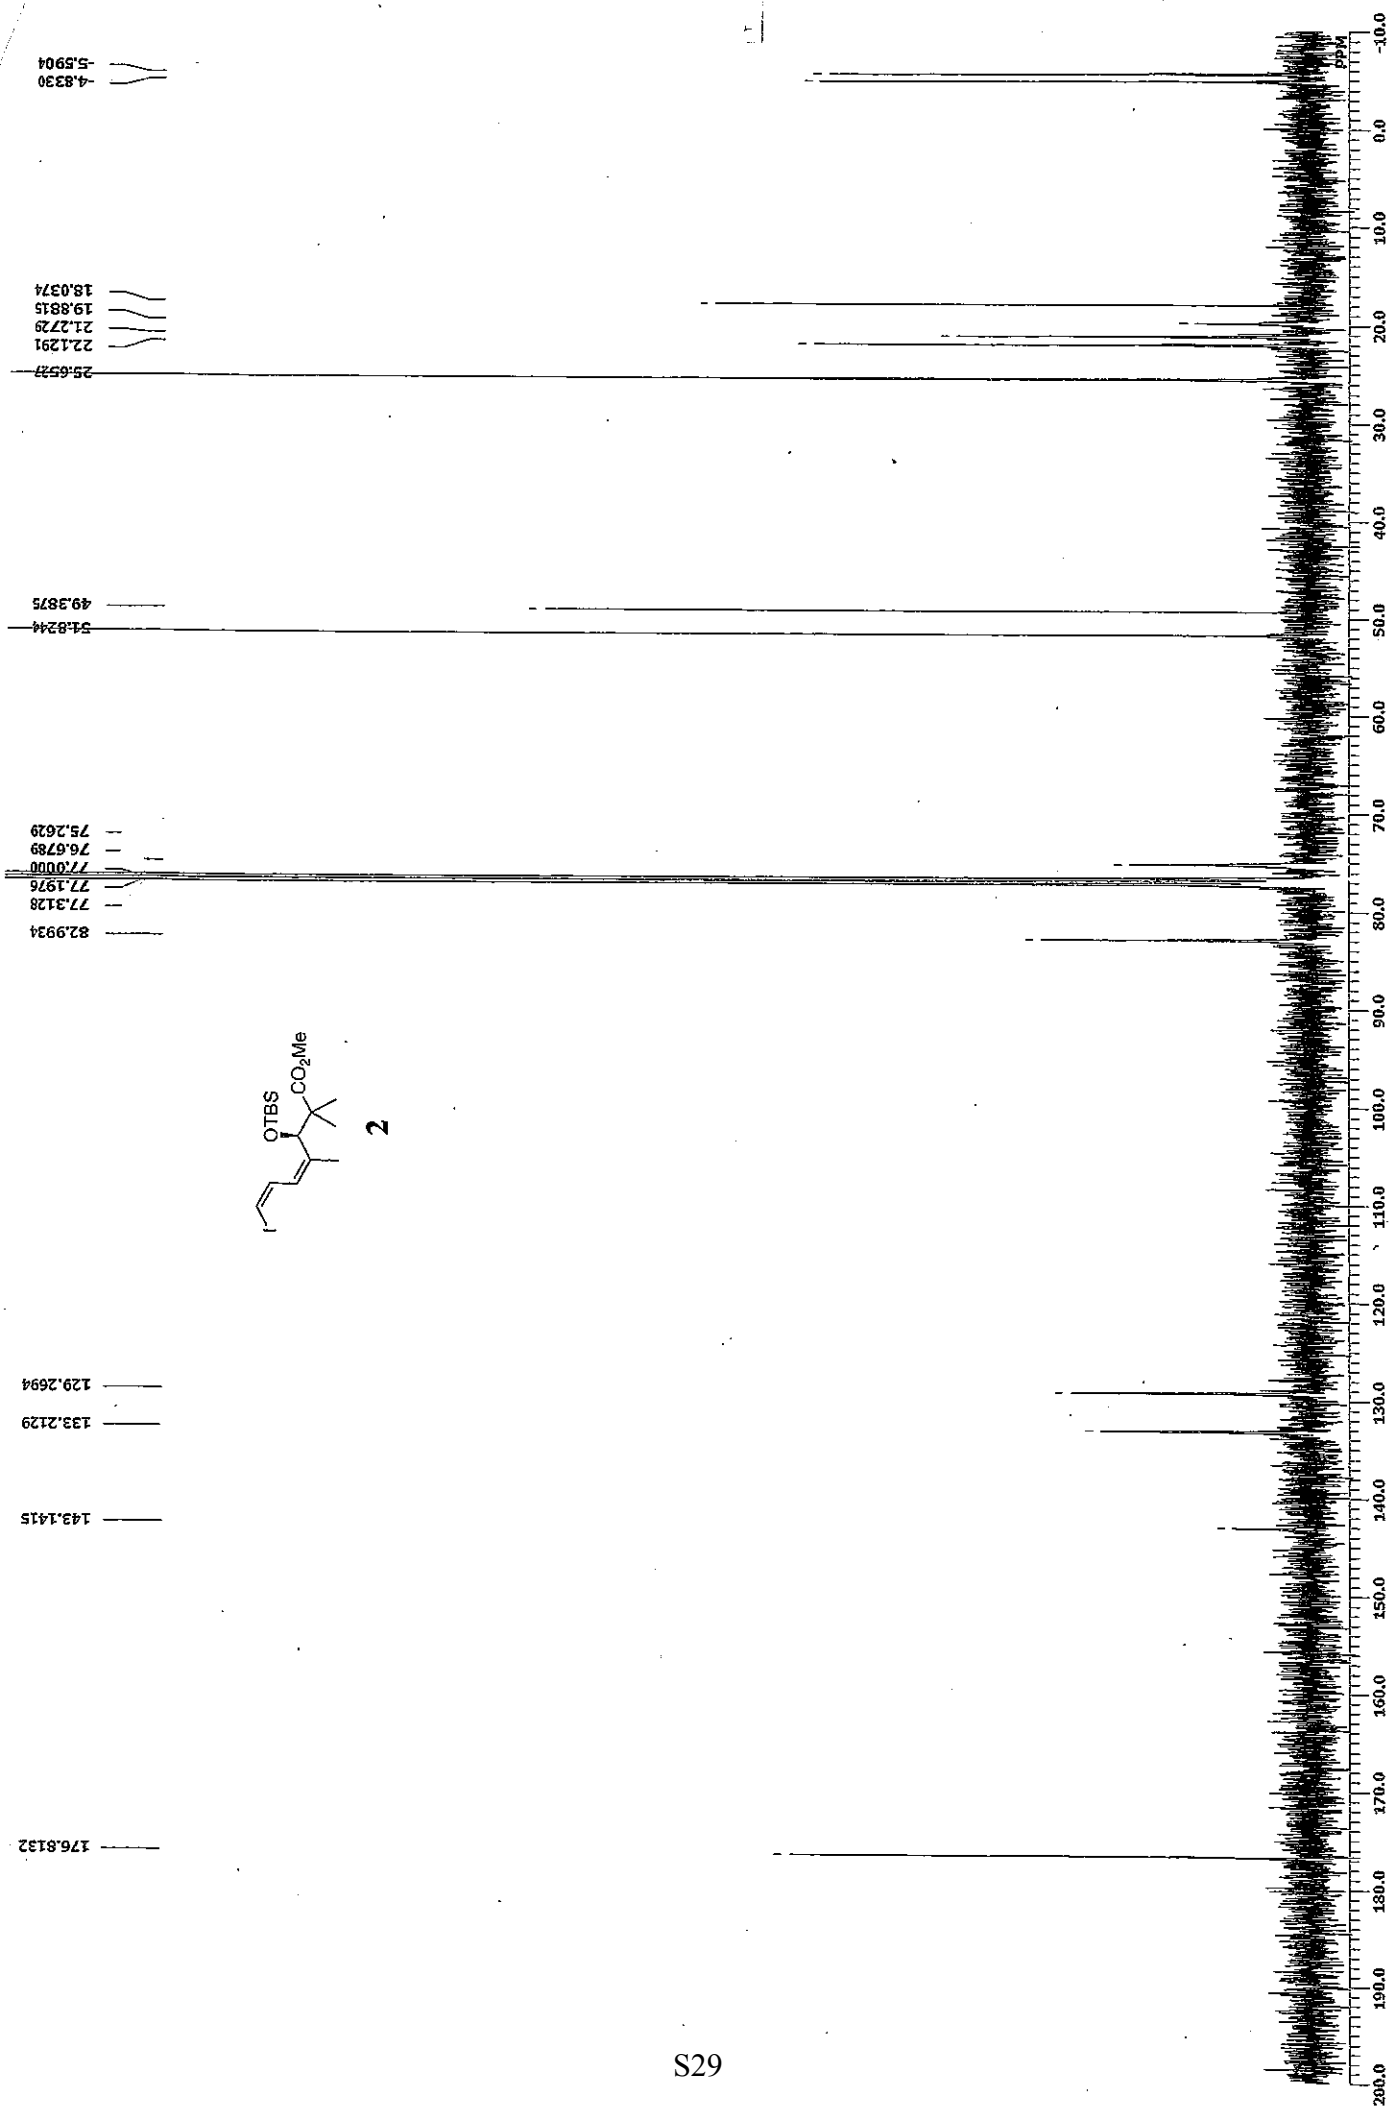

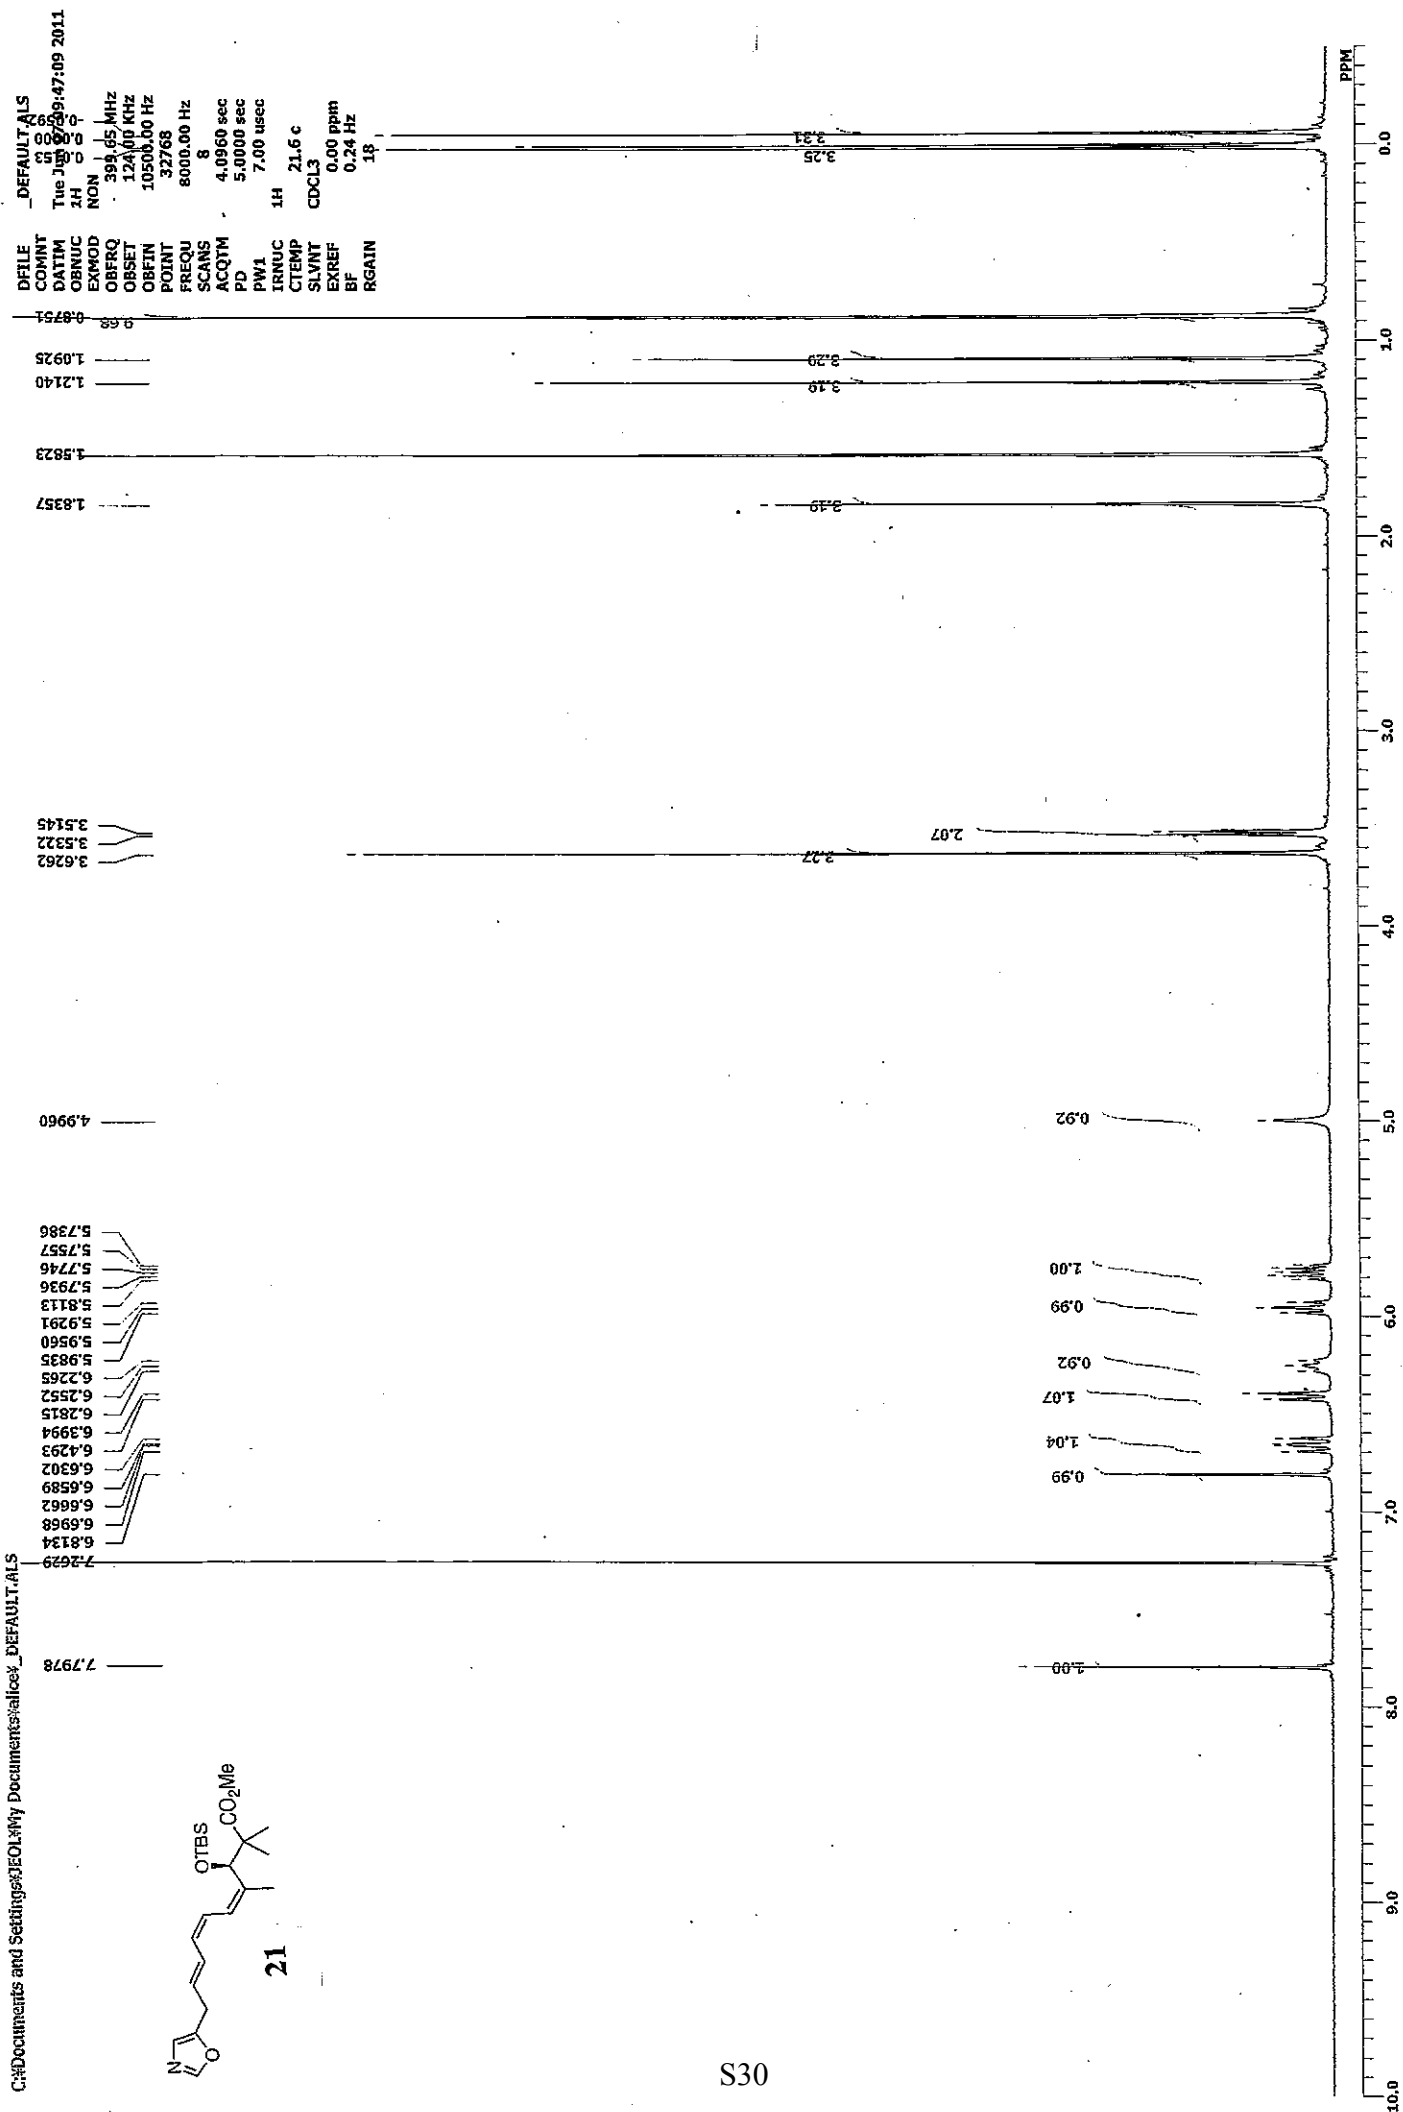

-4.5696  
-5.2529

18.3420  
20.1367  
21.5198  
22.5736  
25.8914  
25.9819  
29.1598

49.7580  
52.0467

74.4808  
77.0000  
77.3211  
77.5187  
77.6339

122.8150  
127.3265  
128.1662  
129.8375  
131.7722  
133.8056  
138.5888

150.7238  
151.1766

177.3813

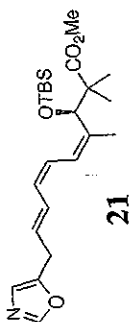

21

S31

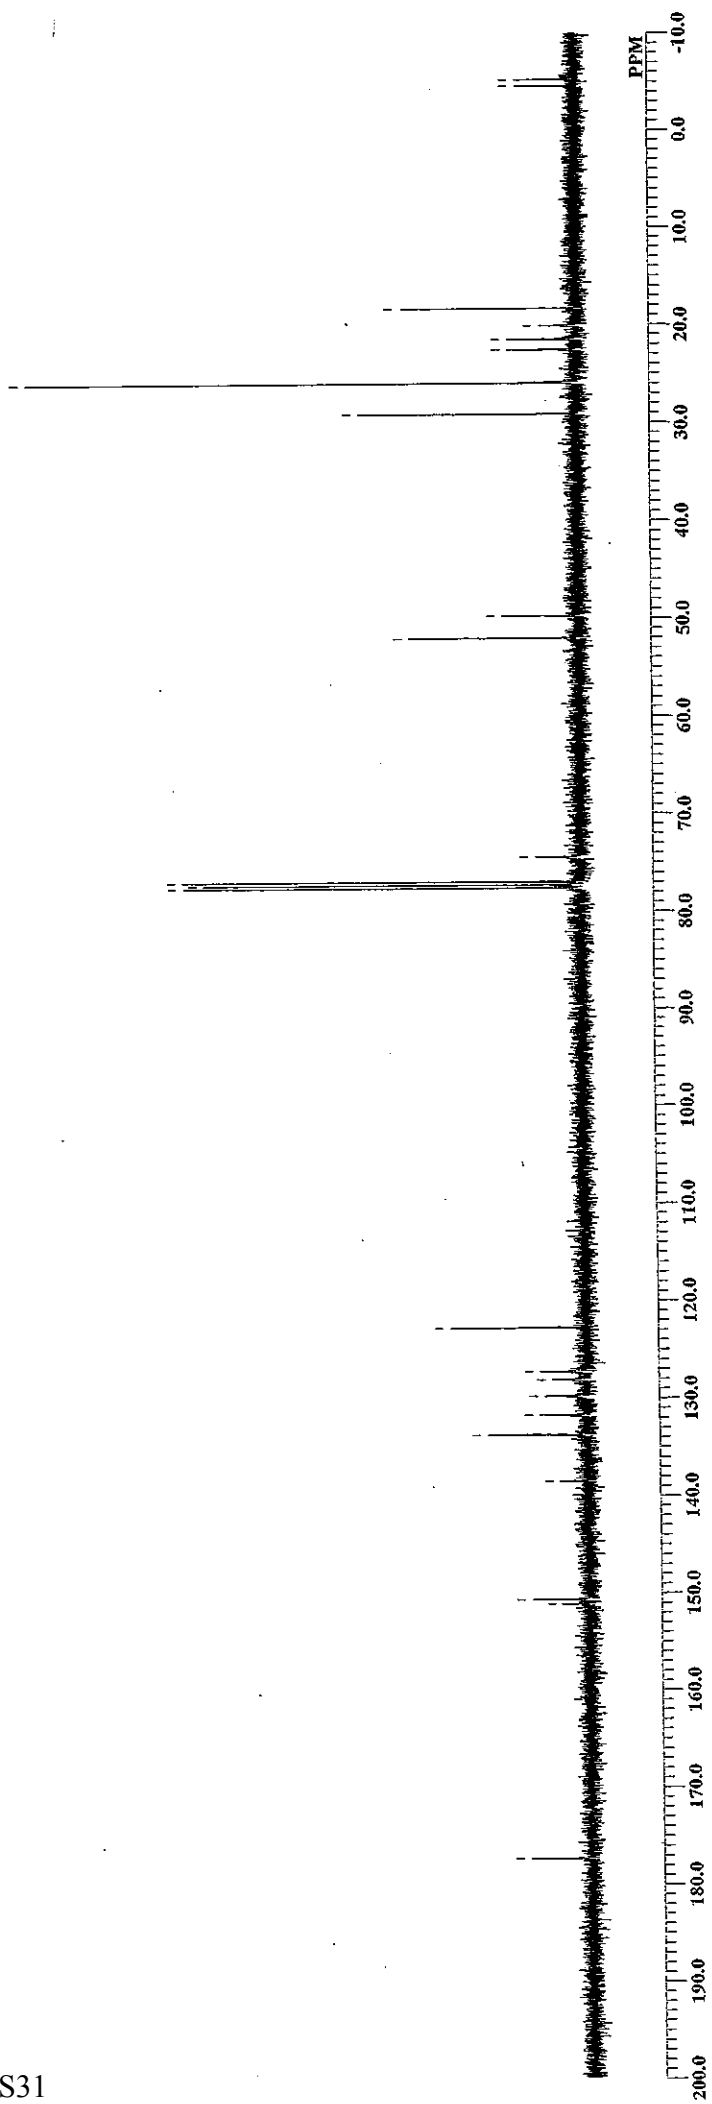

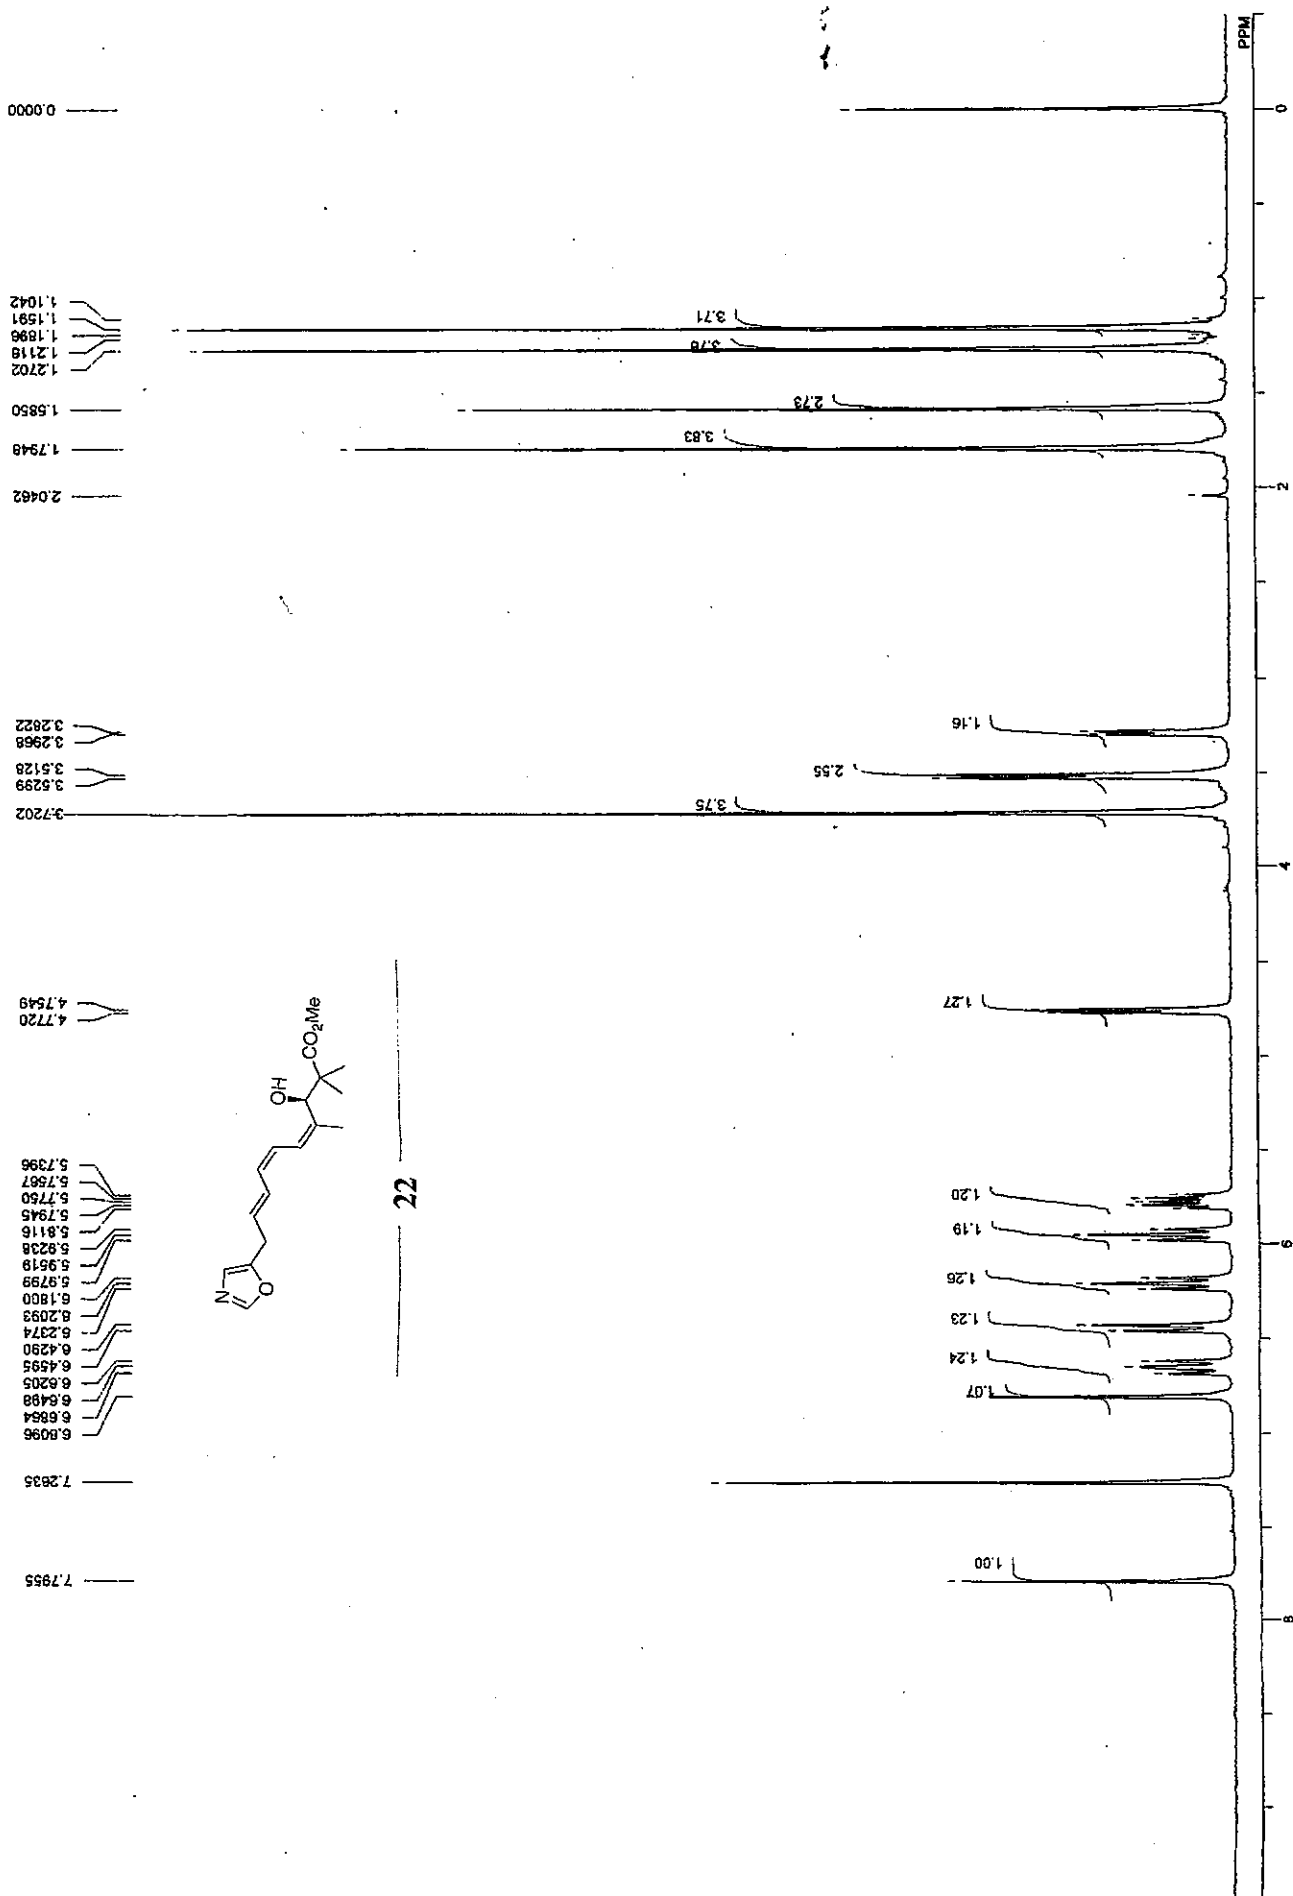



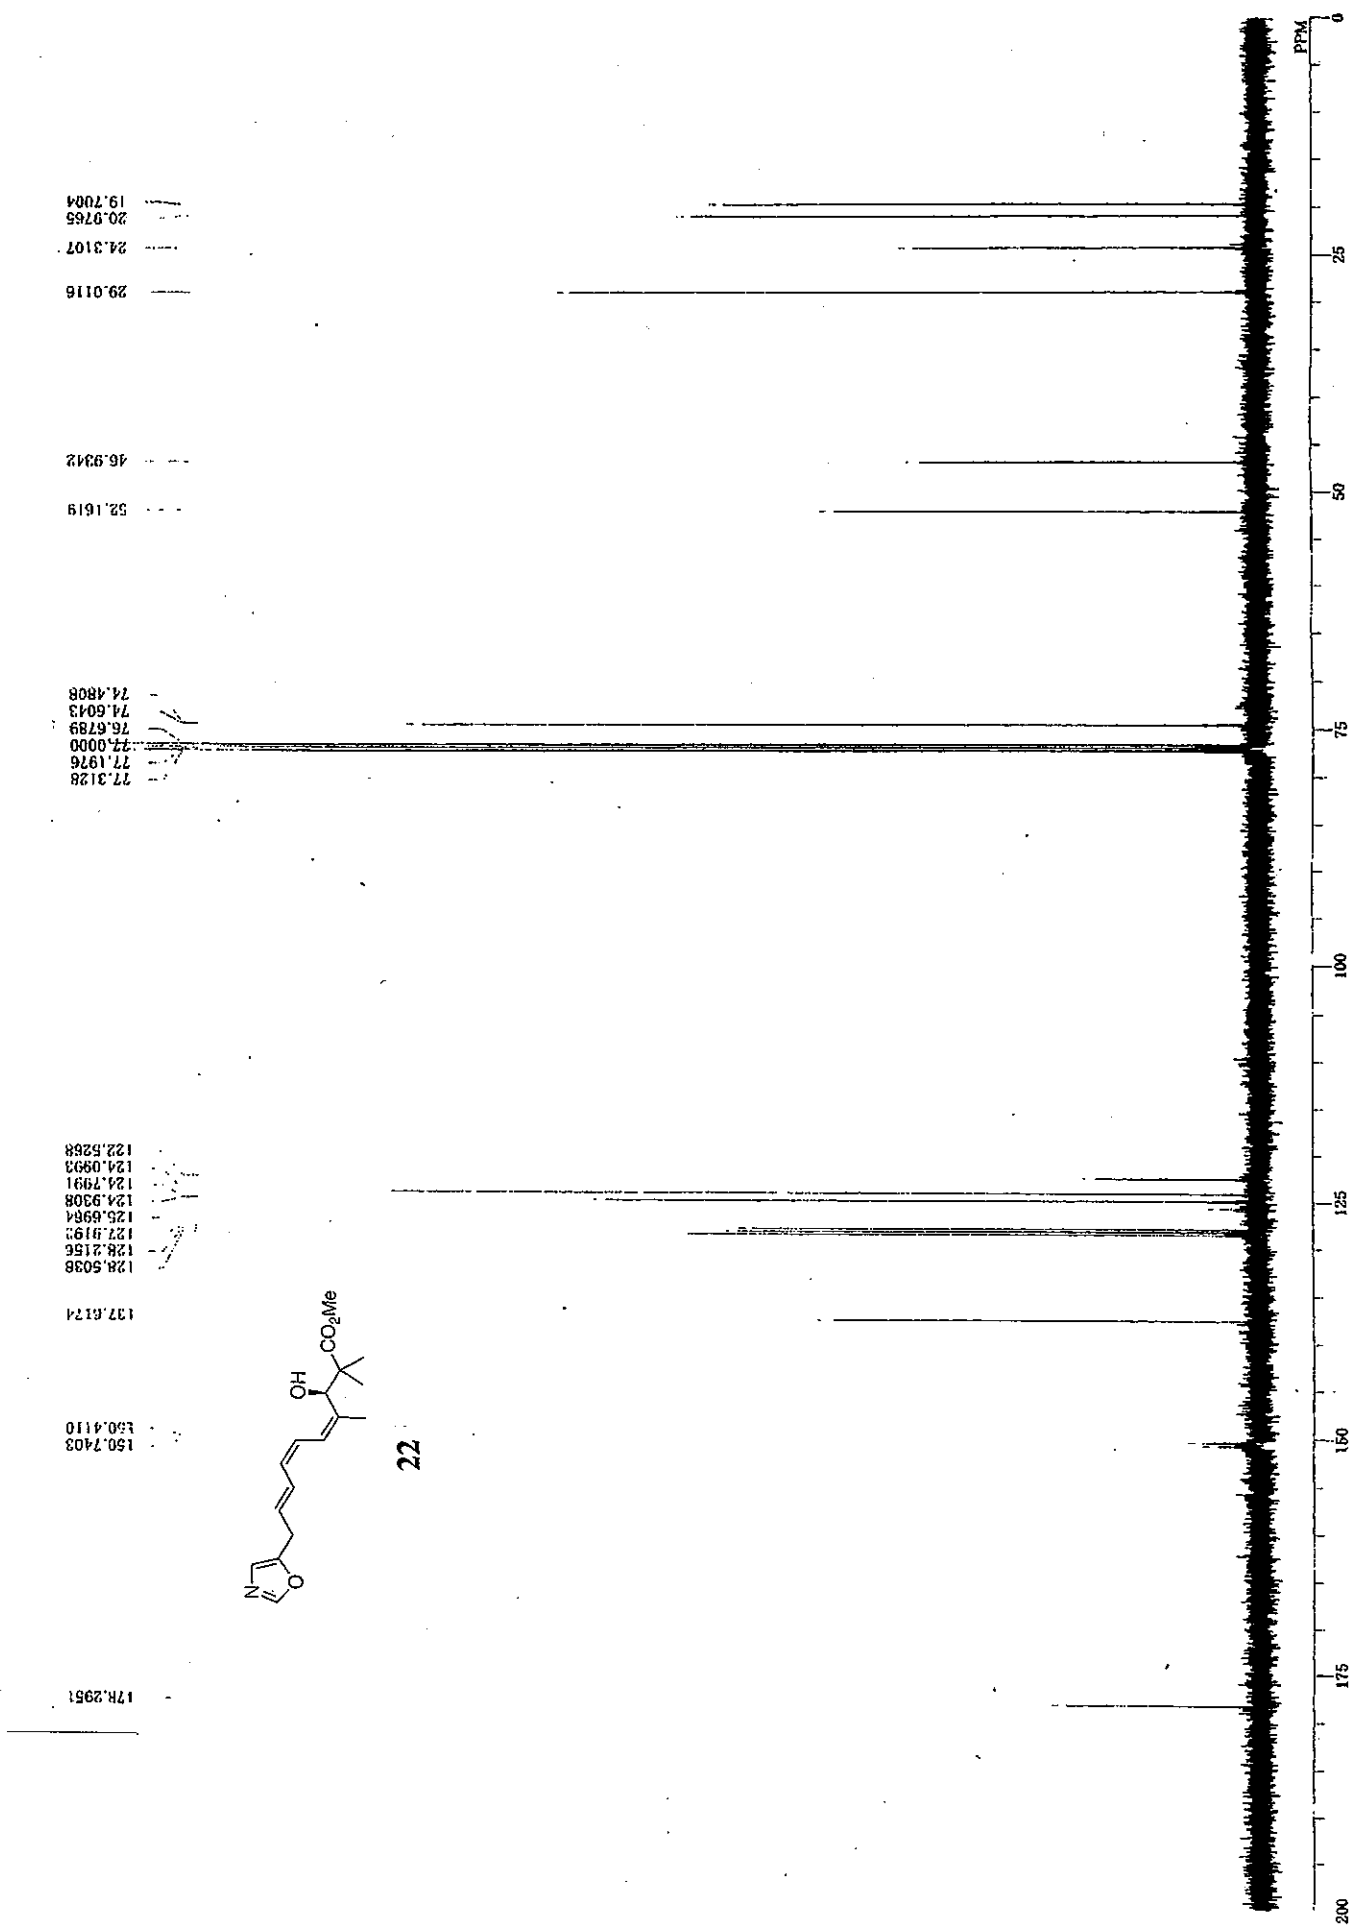

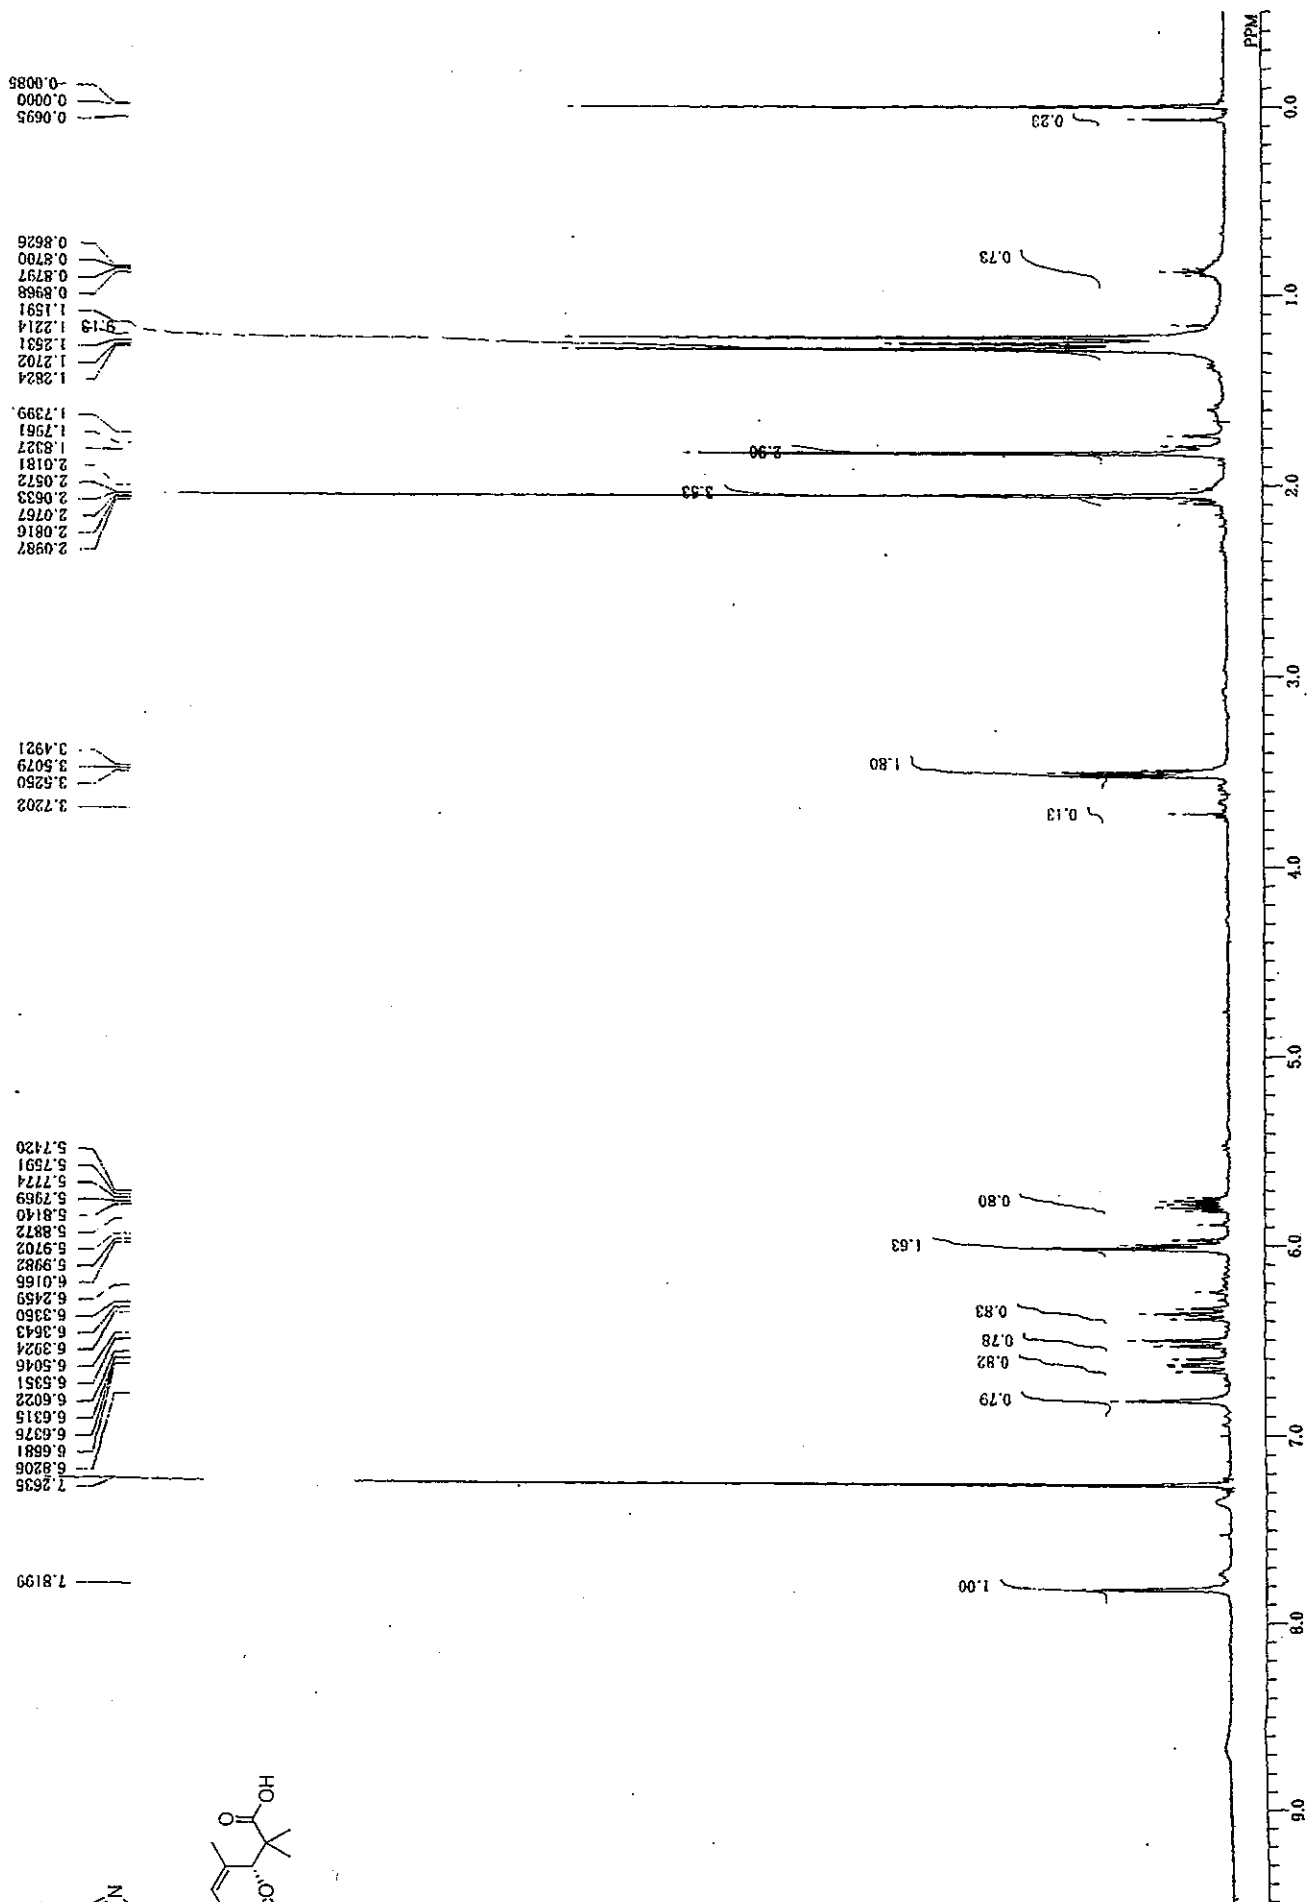

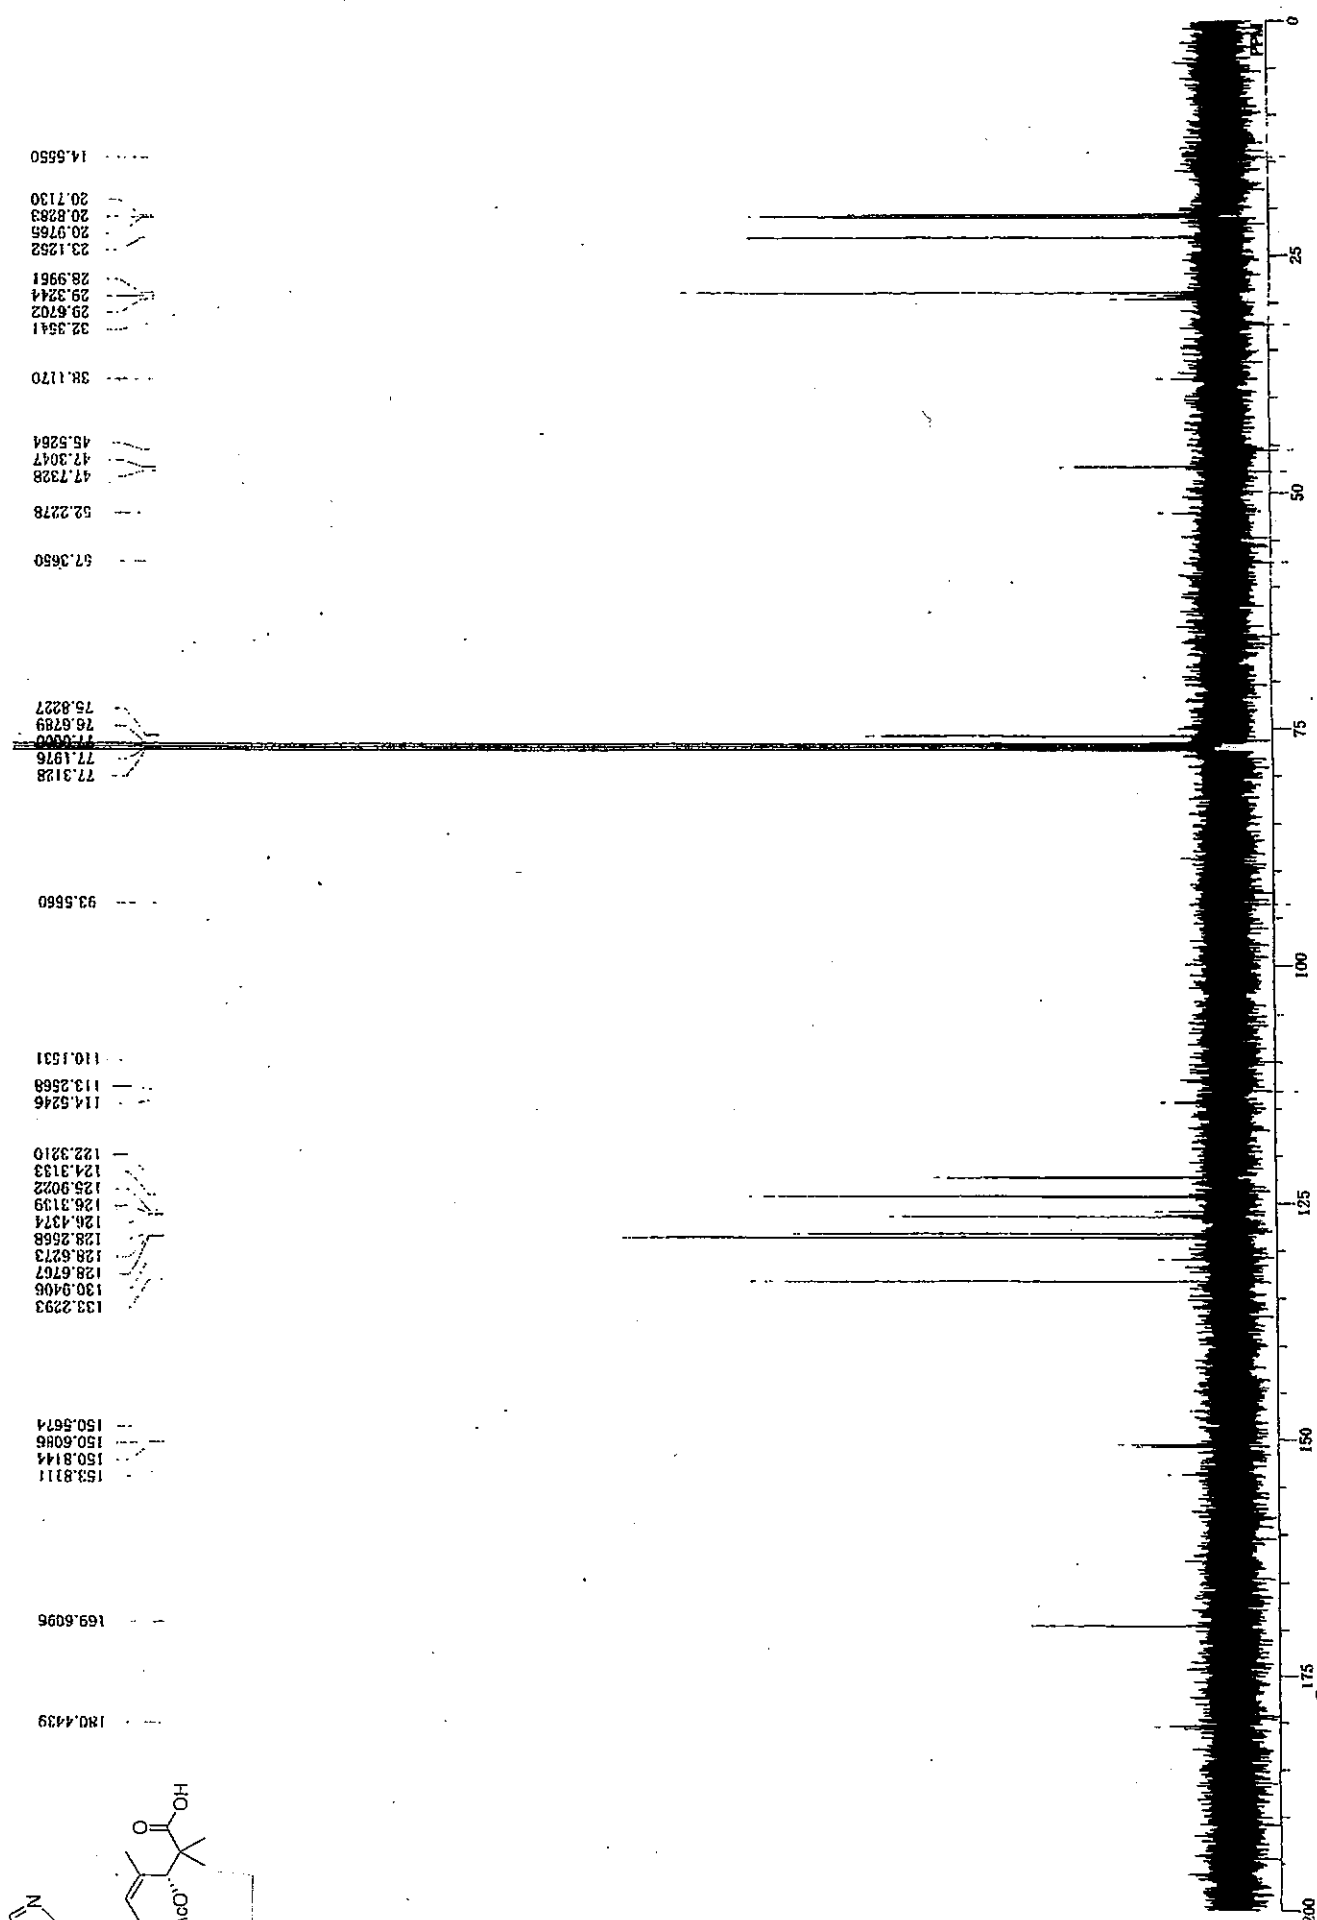

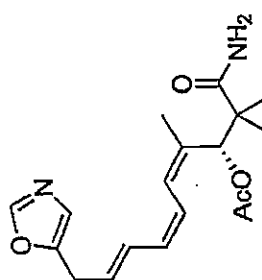

23

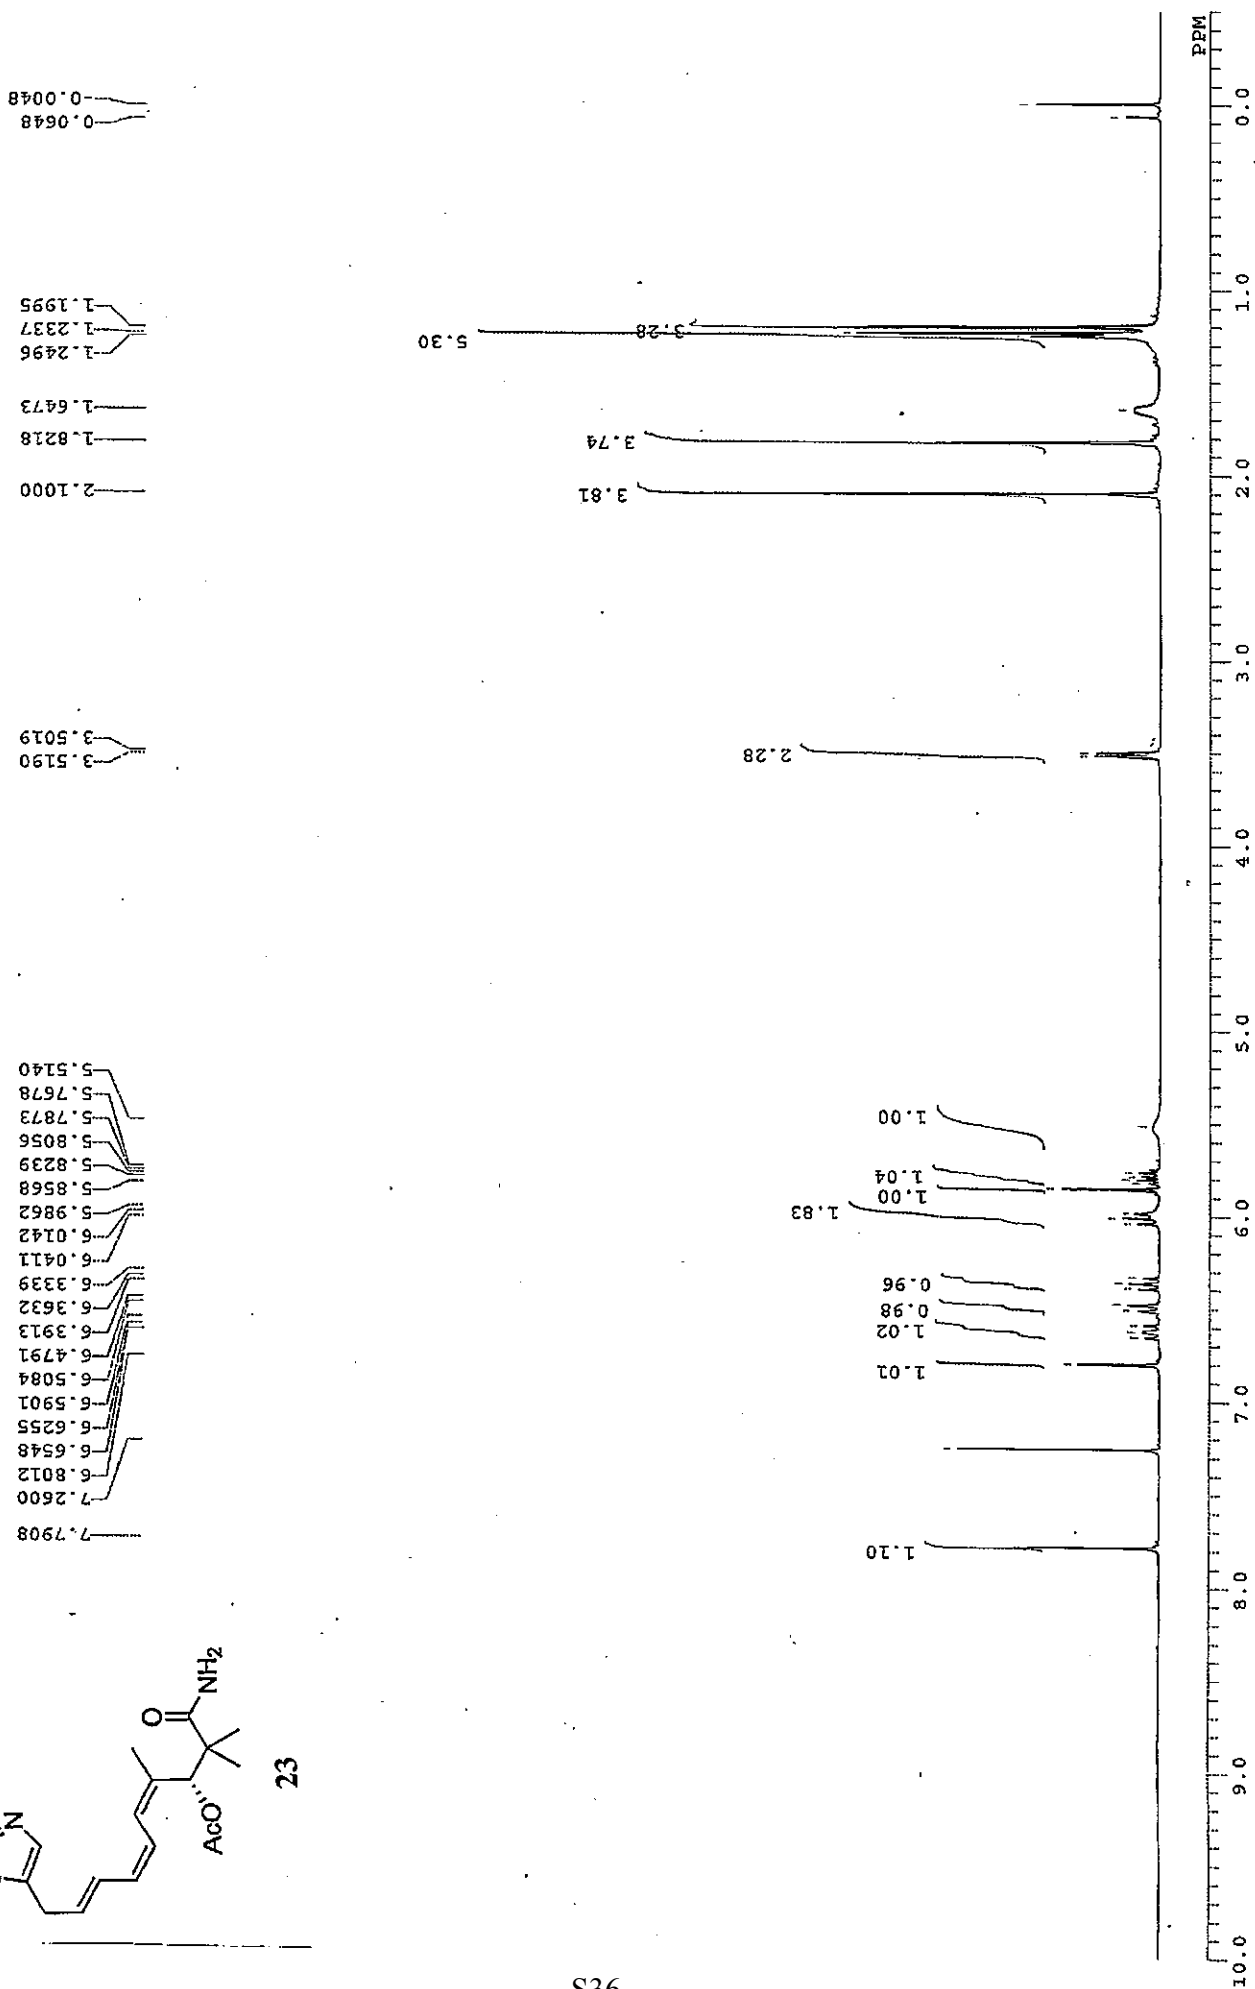

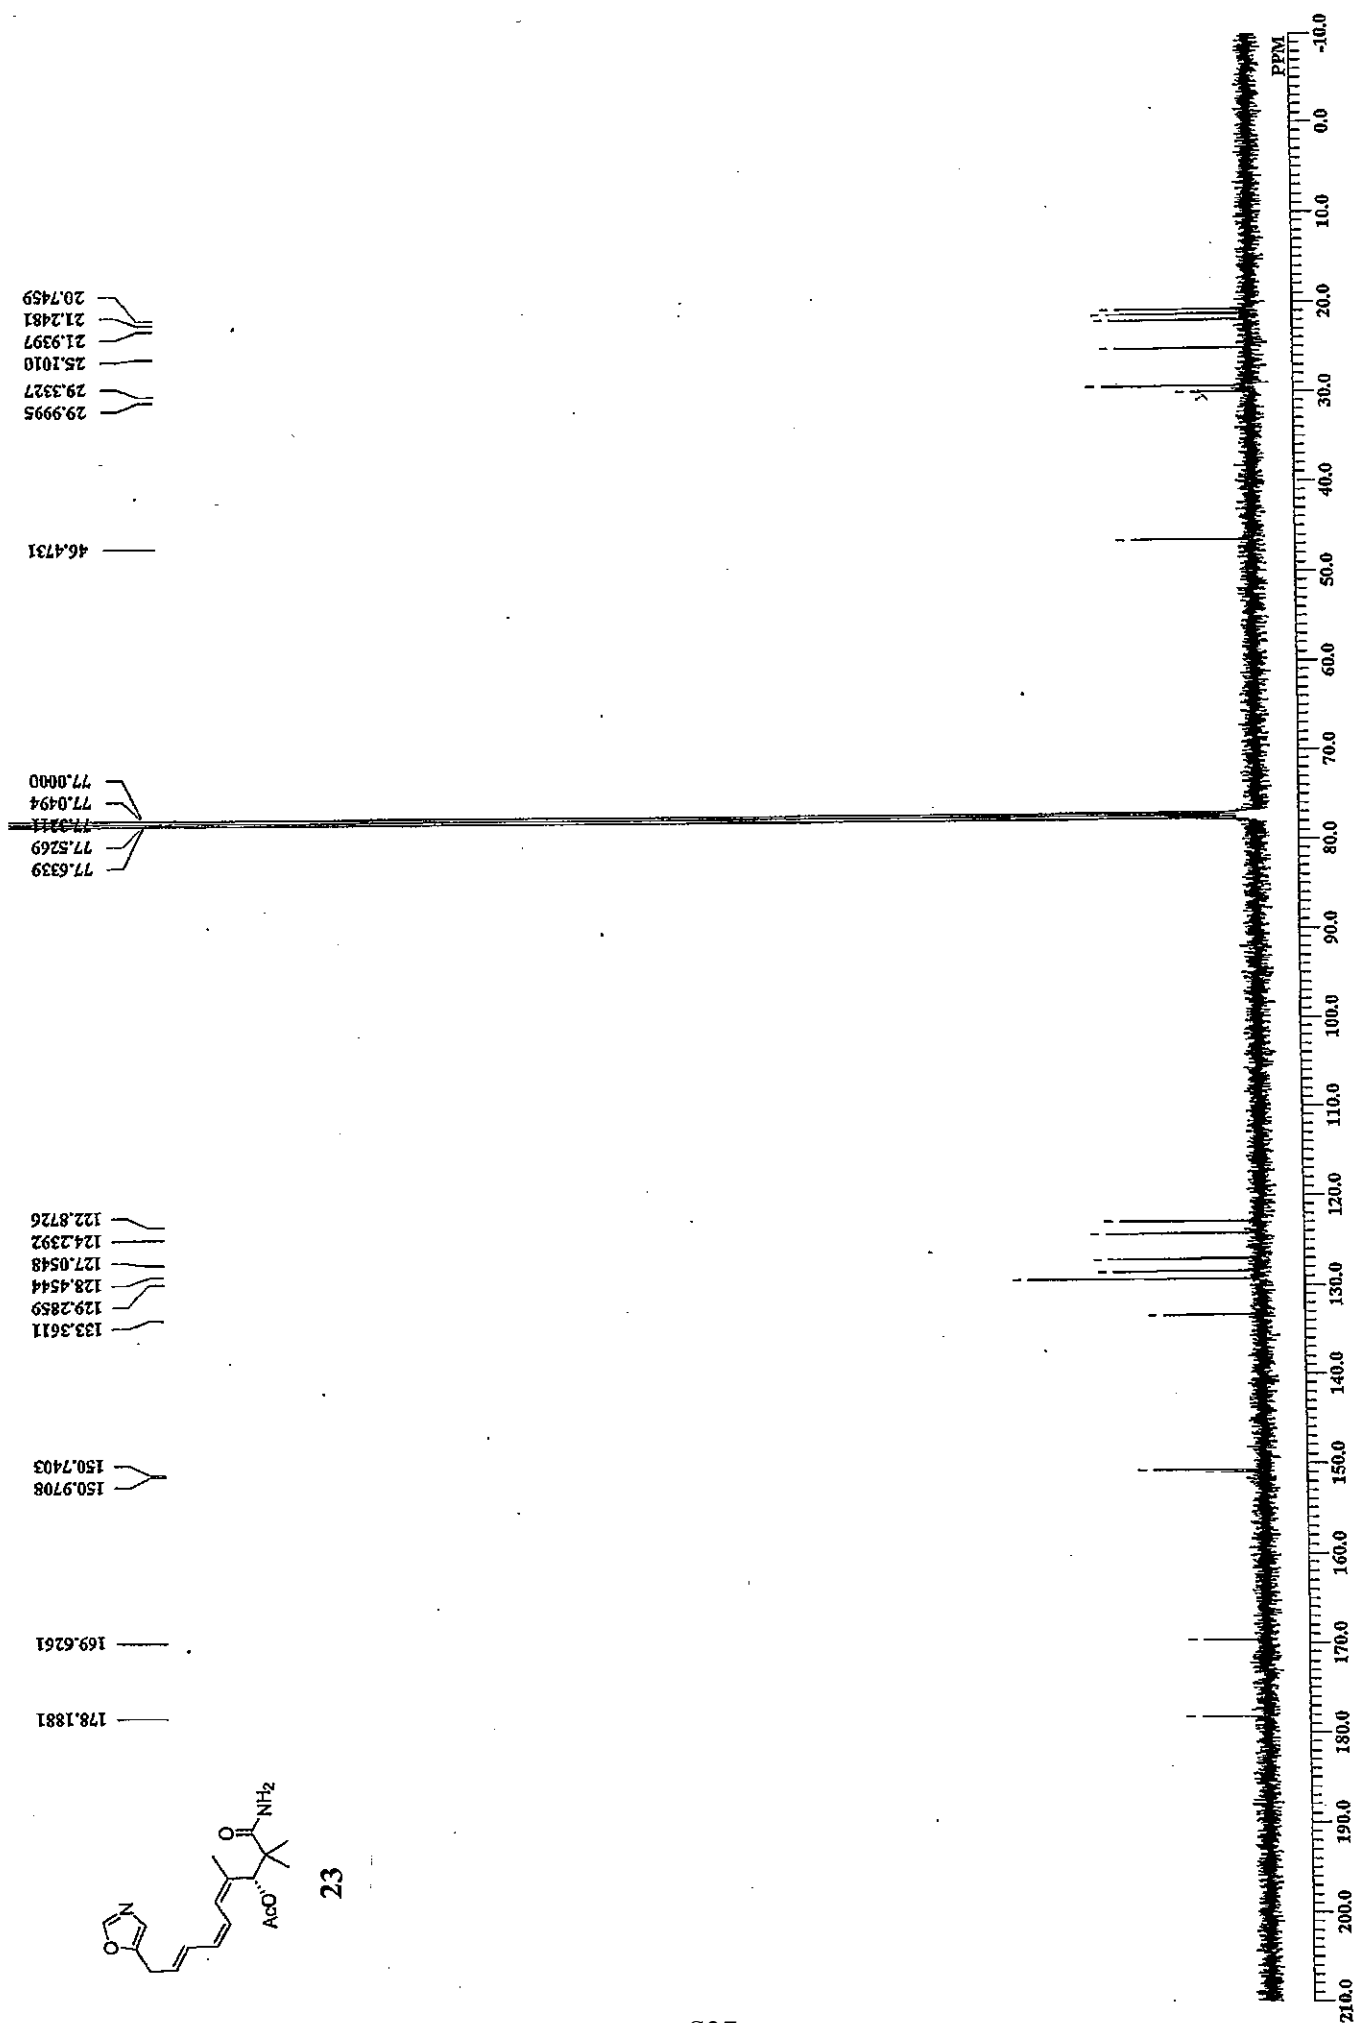

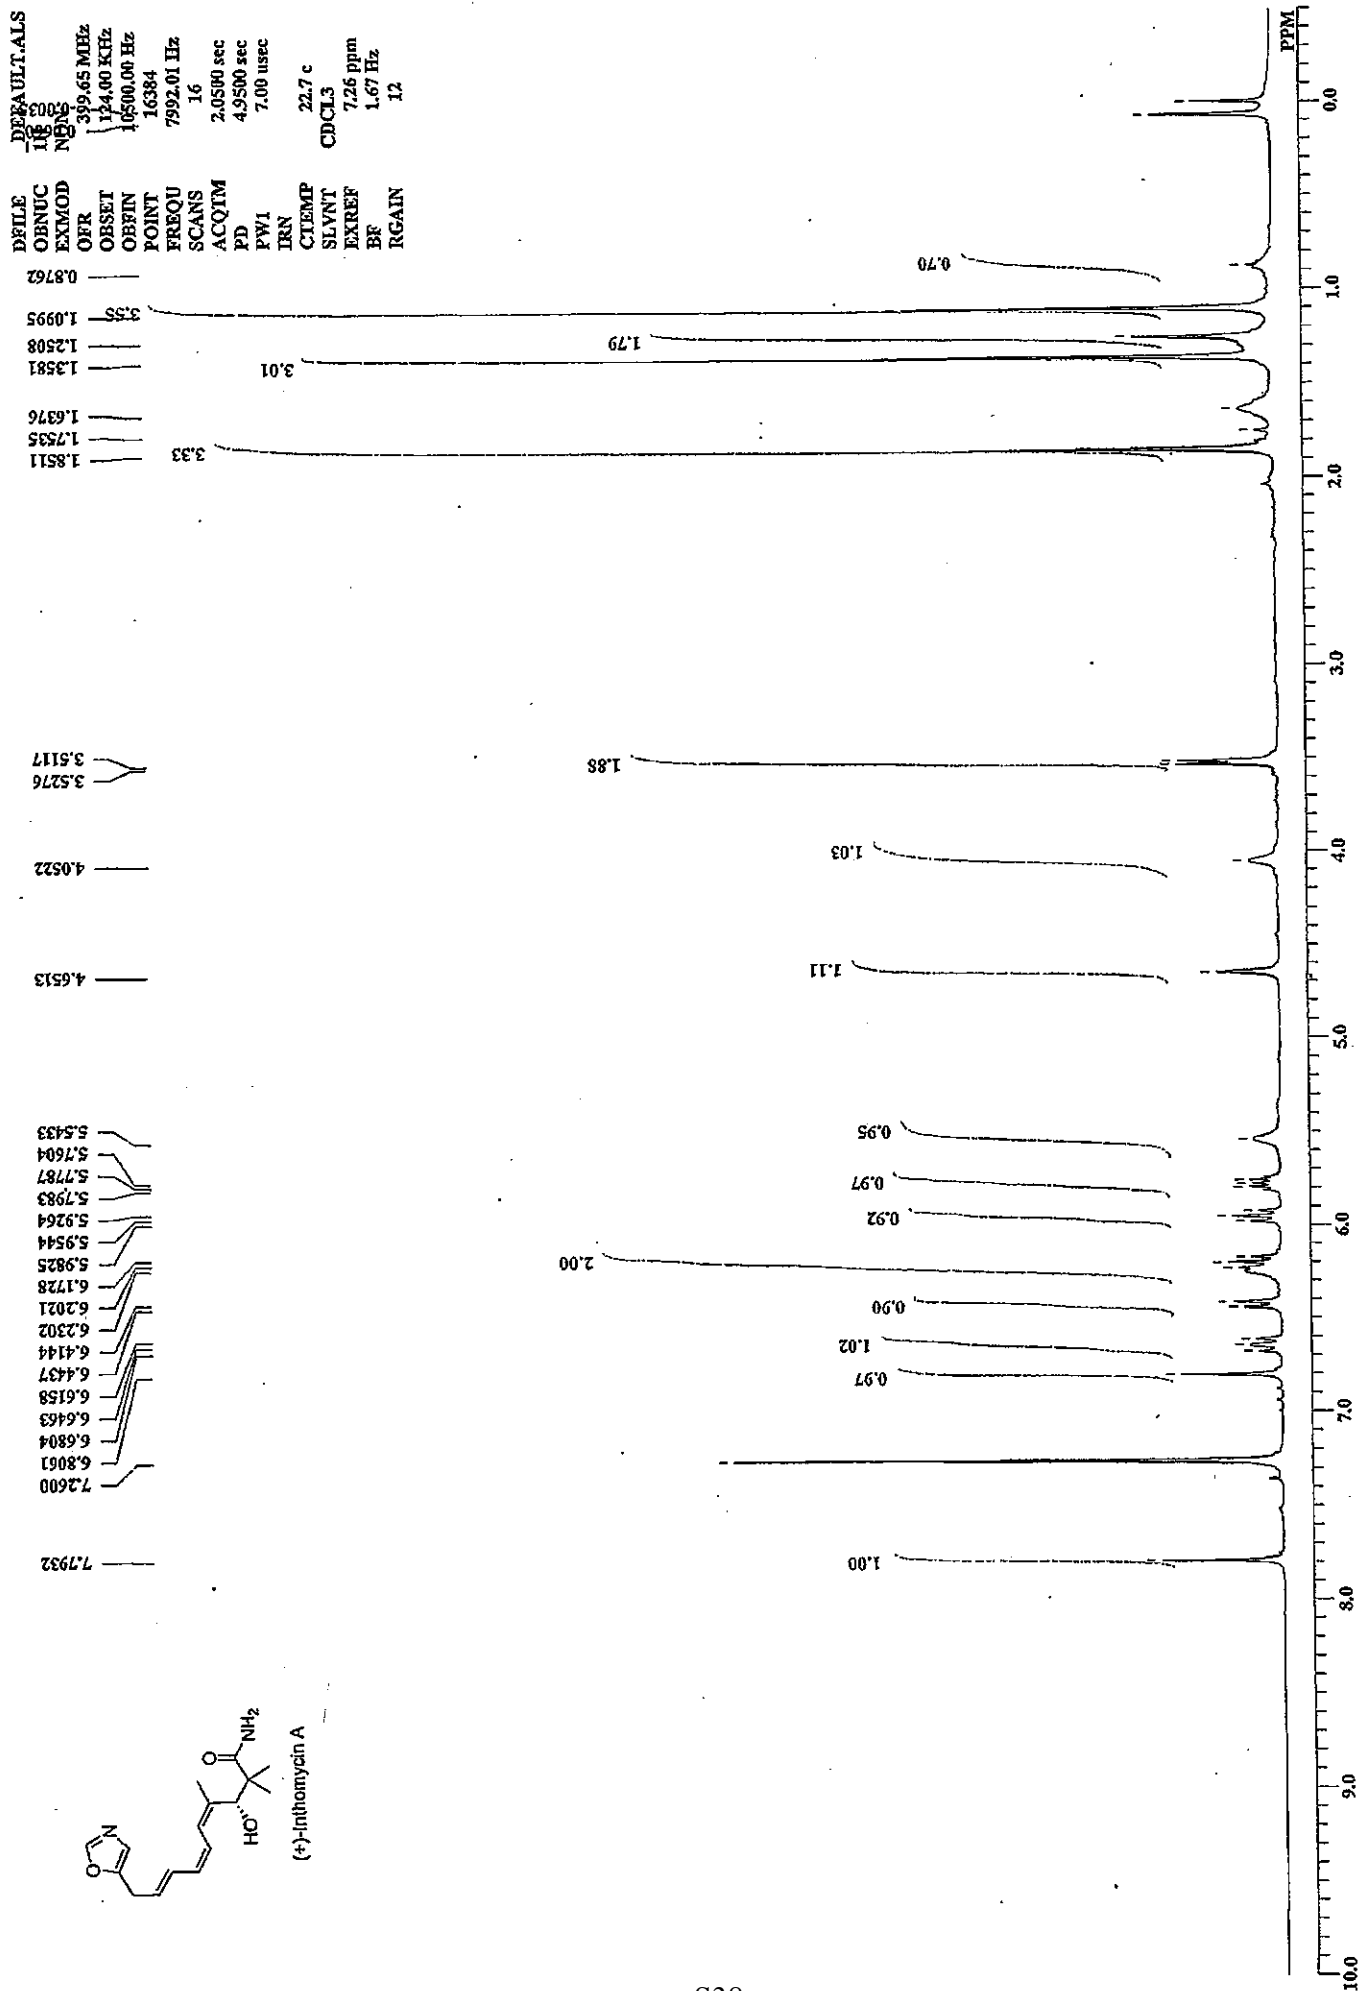

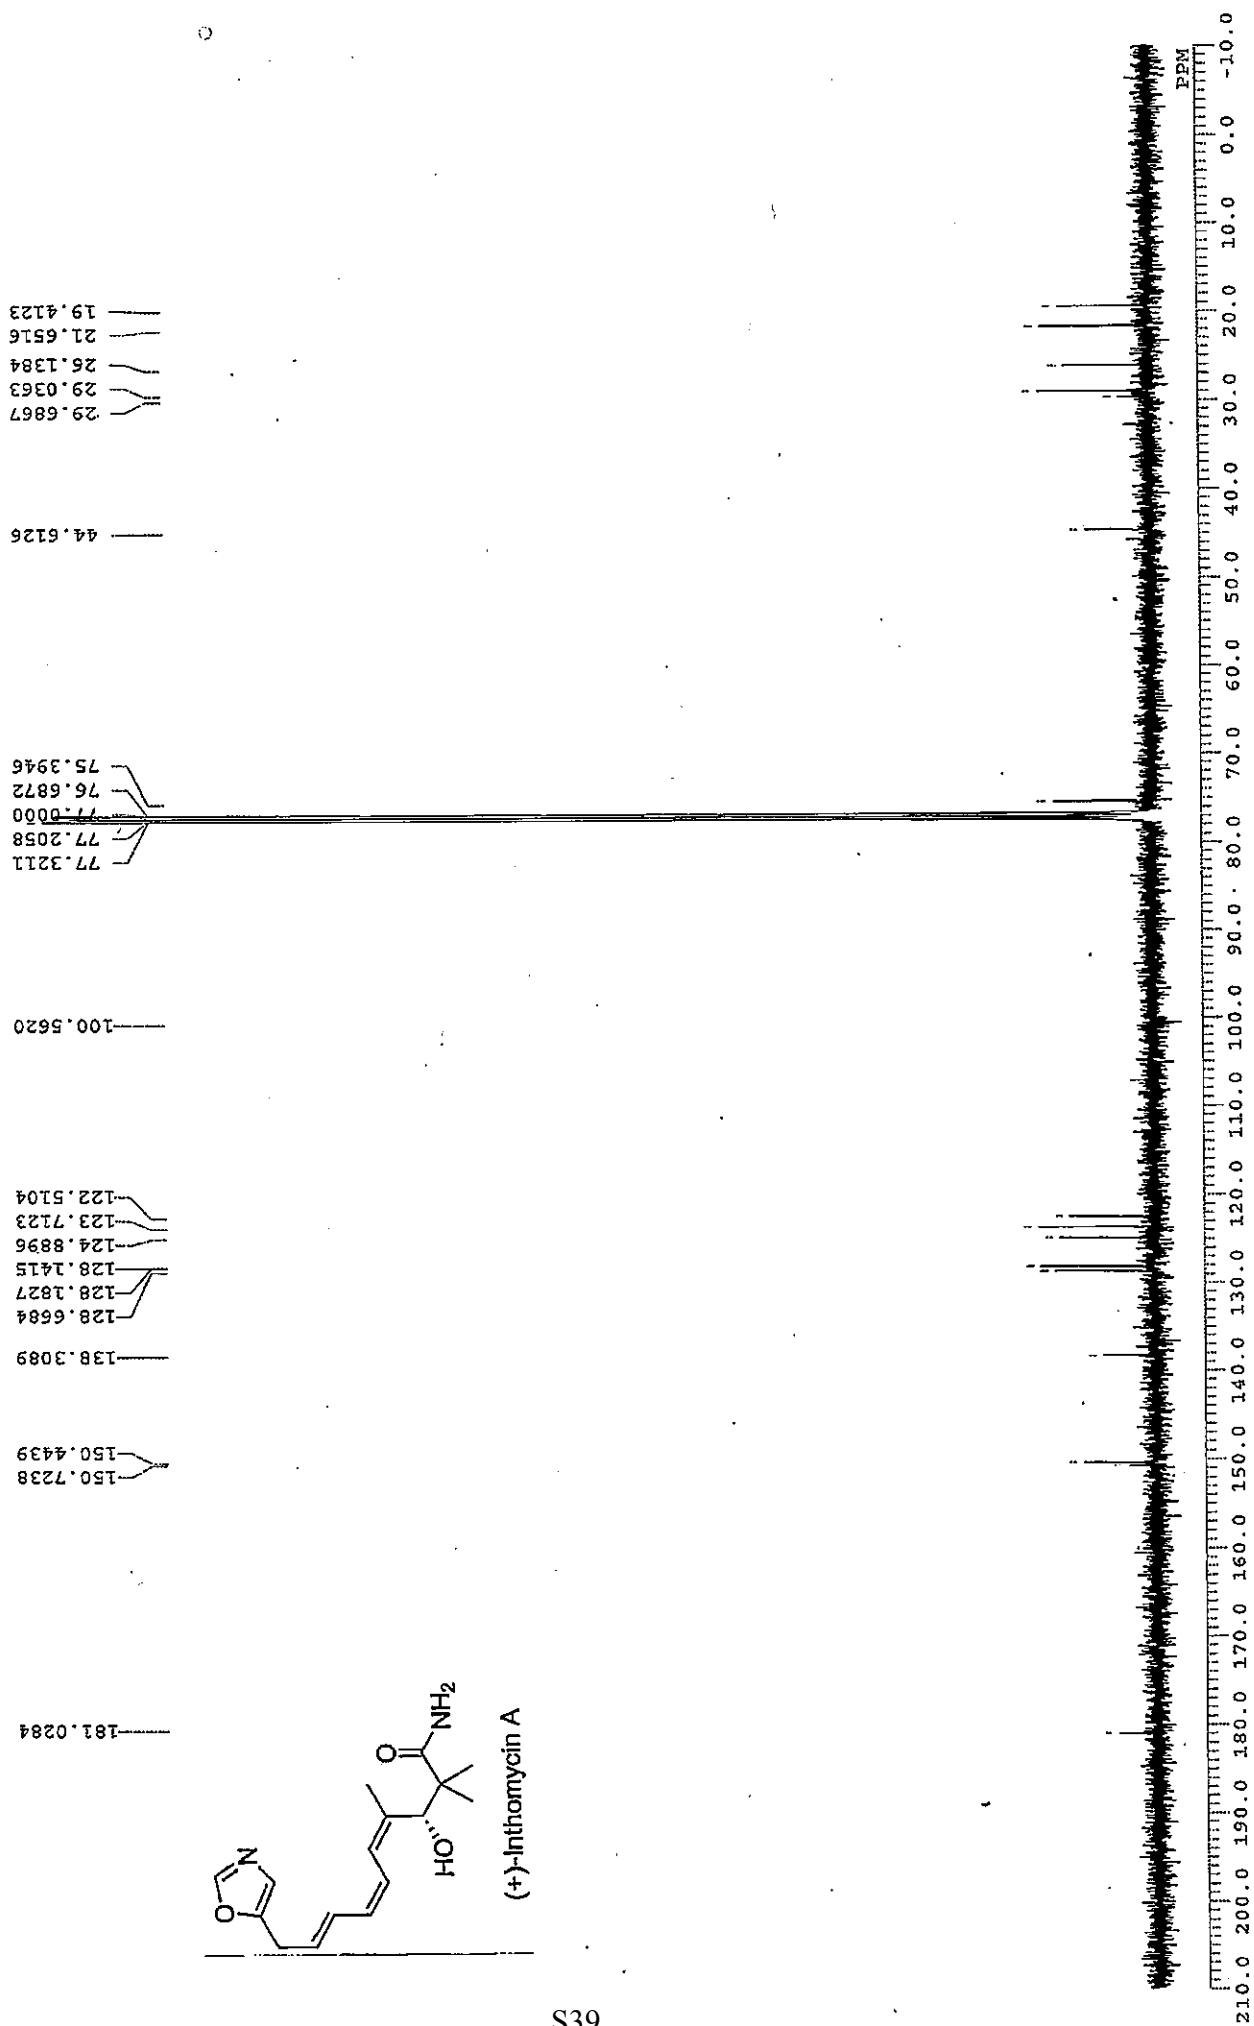

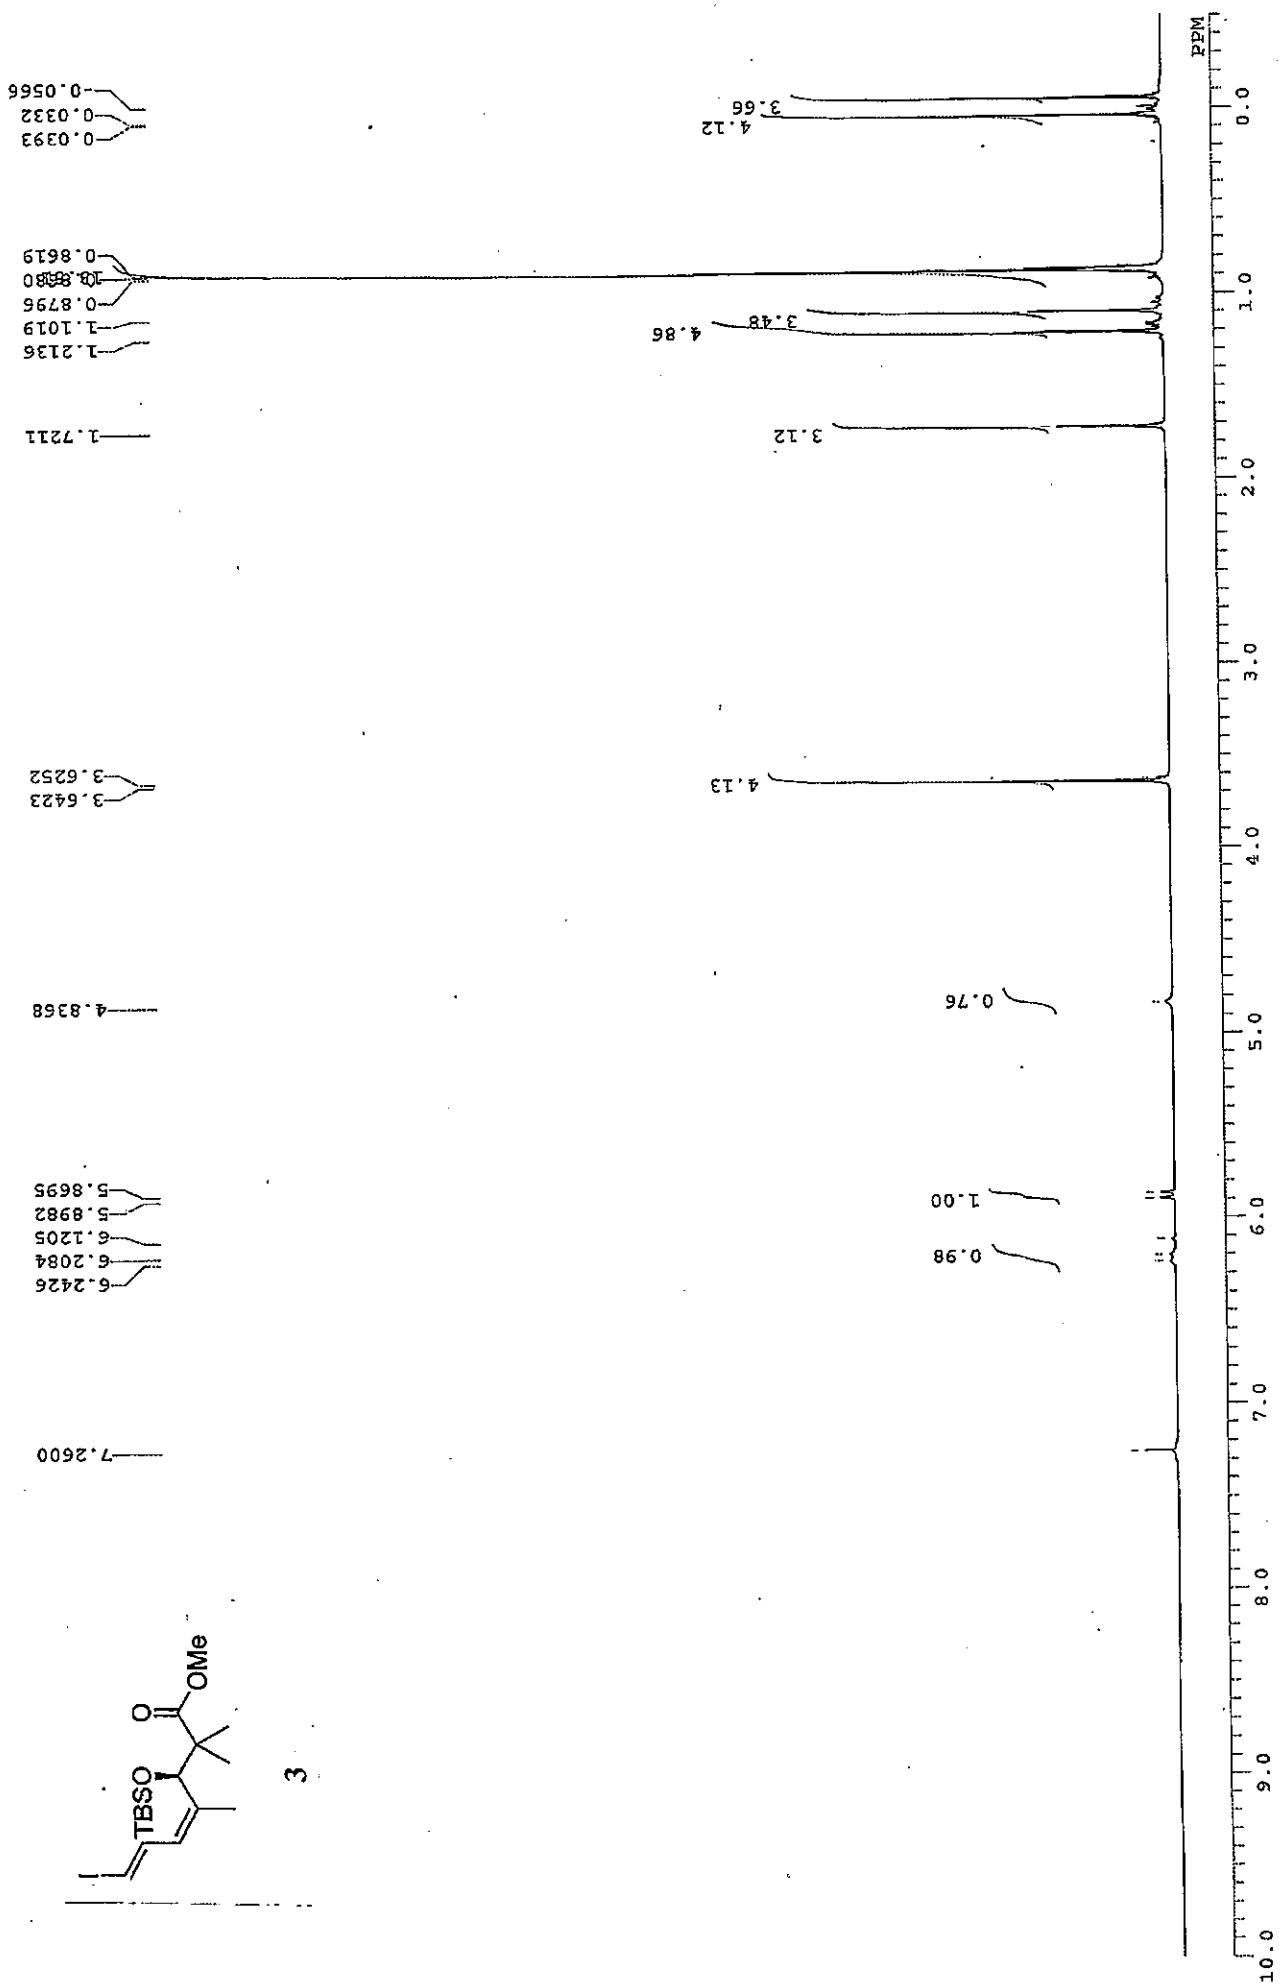



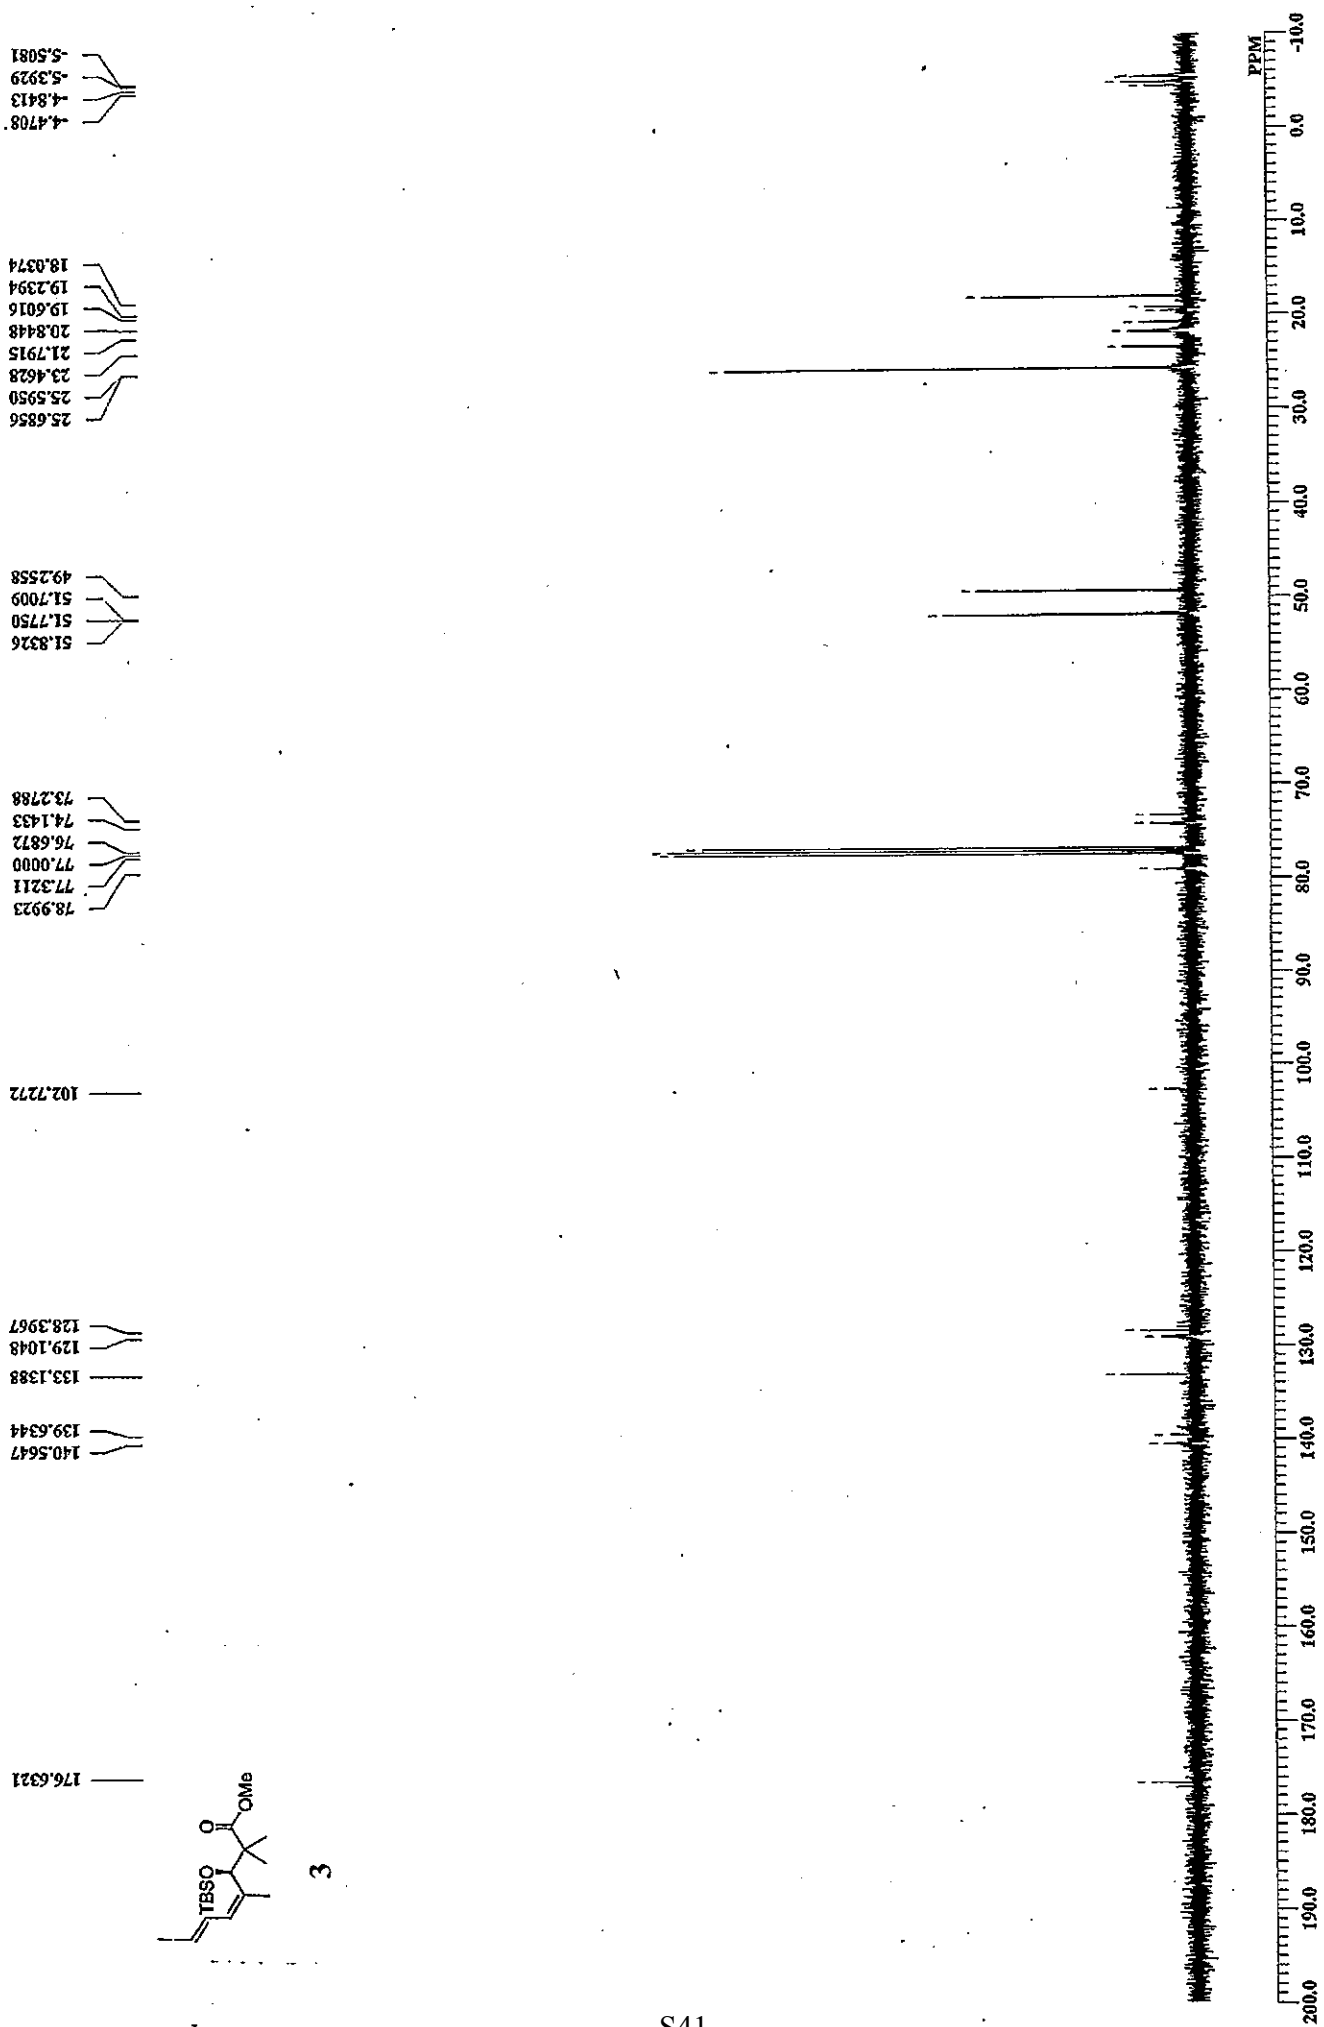

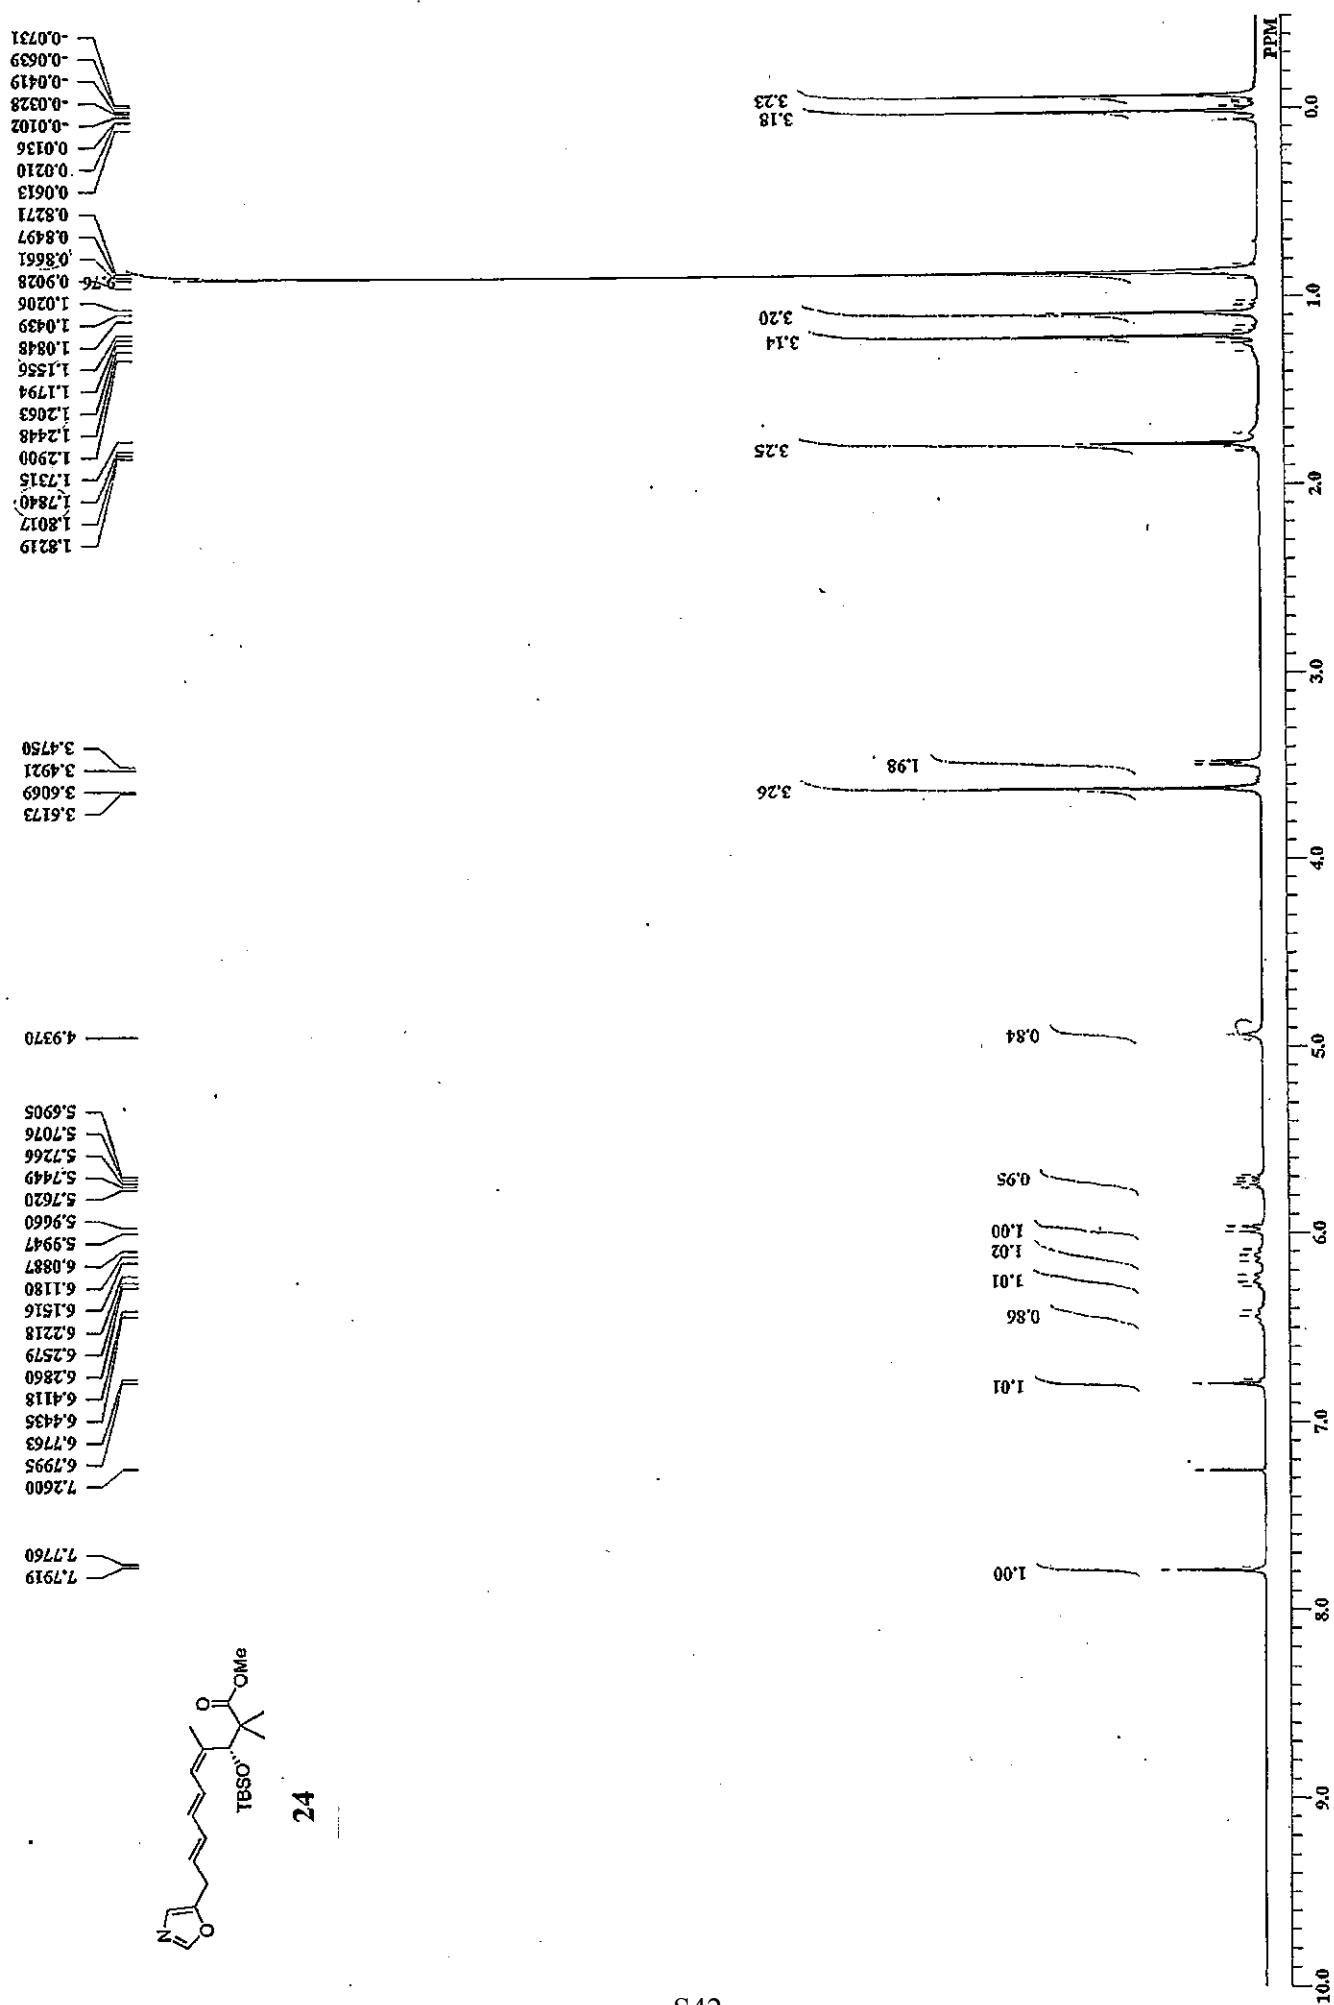

-4.5696  
-5.7529

18.3420  
20.1367  
21.5198  
22.5736  
25.8914  
25.9819  
29.1598

49.7580  
52.0467

74.4808  
77.0000  
77.3211  
77.5187  
77.6339

122.8150  
127.3265  
128.1662  
129.8375  
131.7722  
133.8056  
138.5888

151.1766  
150.7238

177.3813

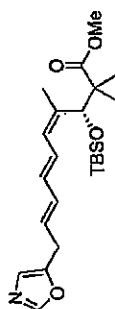

24

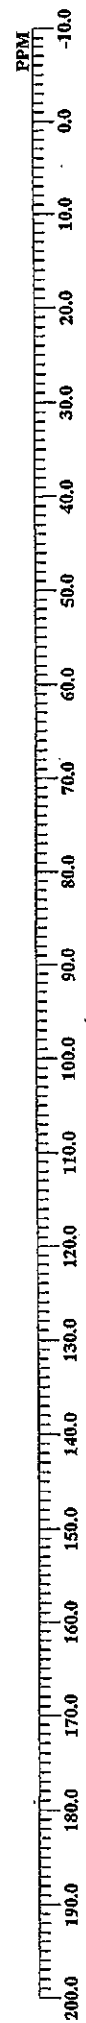

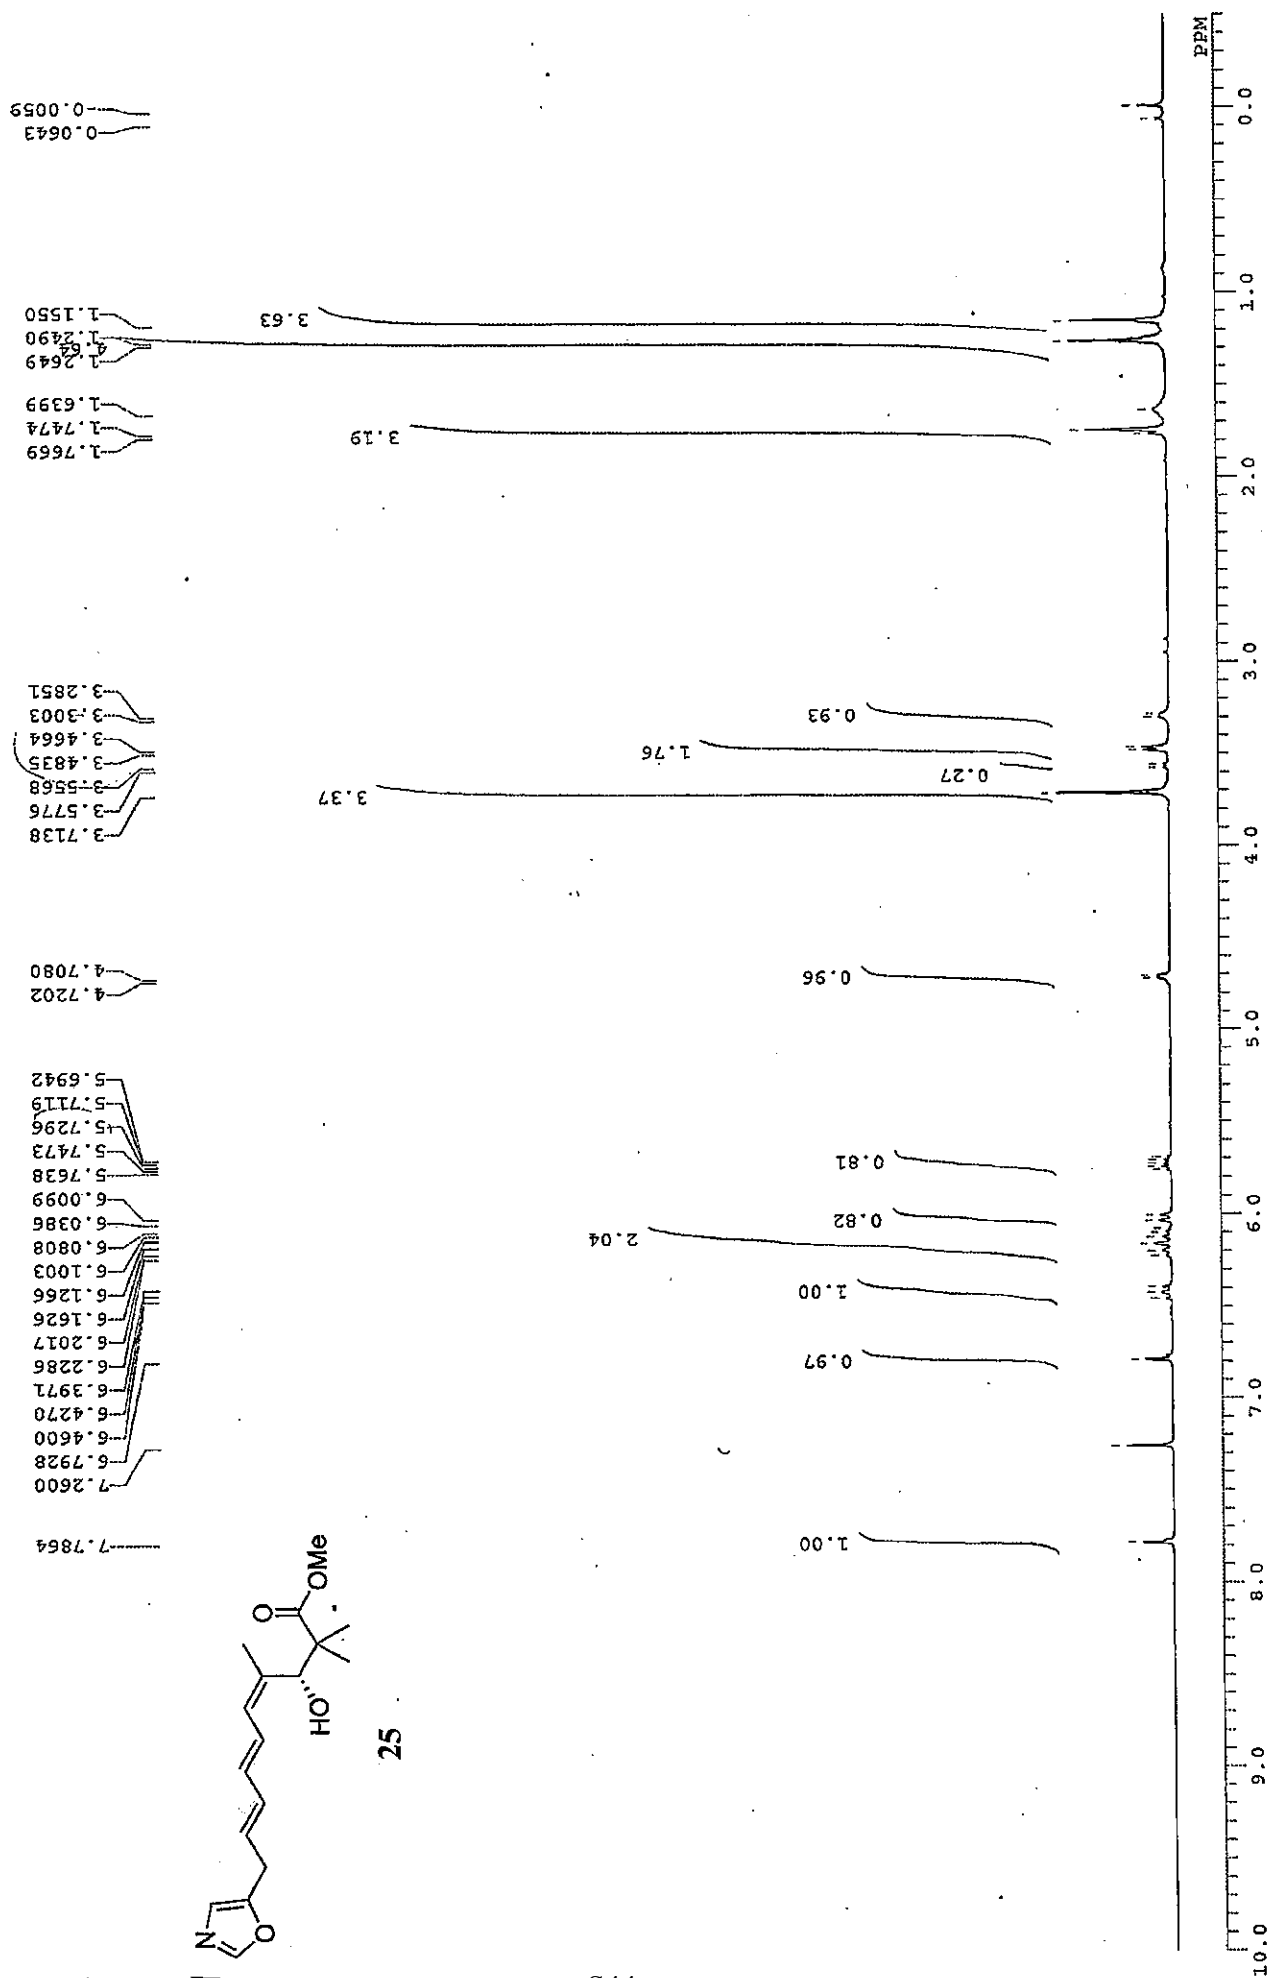

31.2262  
29.3409  
29.1433  
24.6894  
21.3222  
21.2811  
20.0050

52.5242  
47.1812

77.6339  
77.5187  
77.3211  
77.0000  
75.4029  
74.9336

133.6822  
132.0521  
130.4714  
128.8331  
128.5285  
128.2568  
128.1827  
127.5241  
125.2601  
124.3874  
122.8232

151.1190  
150.7321

178.6656

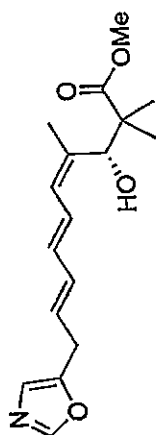

25

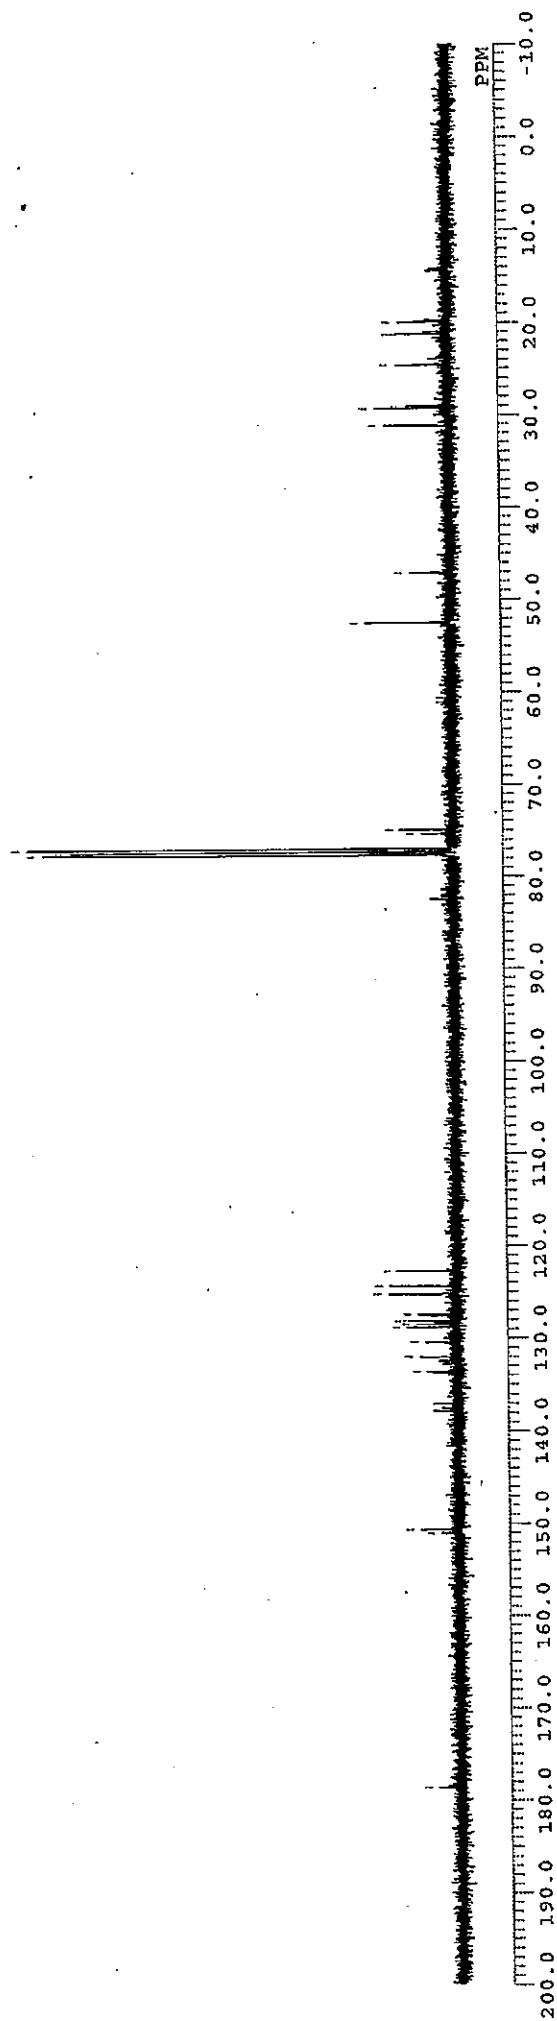

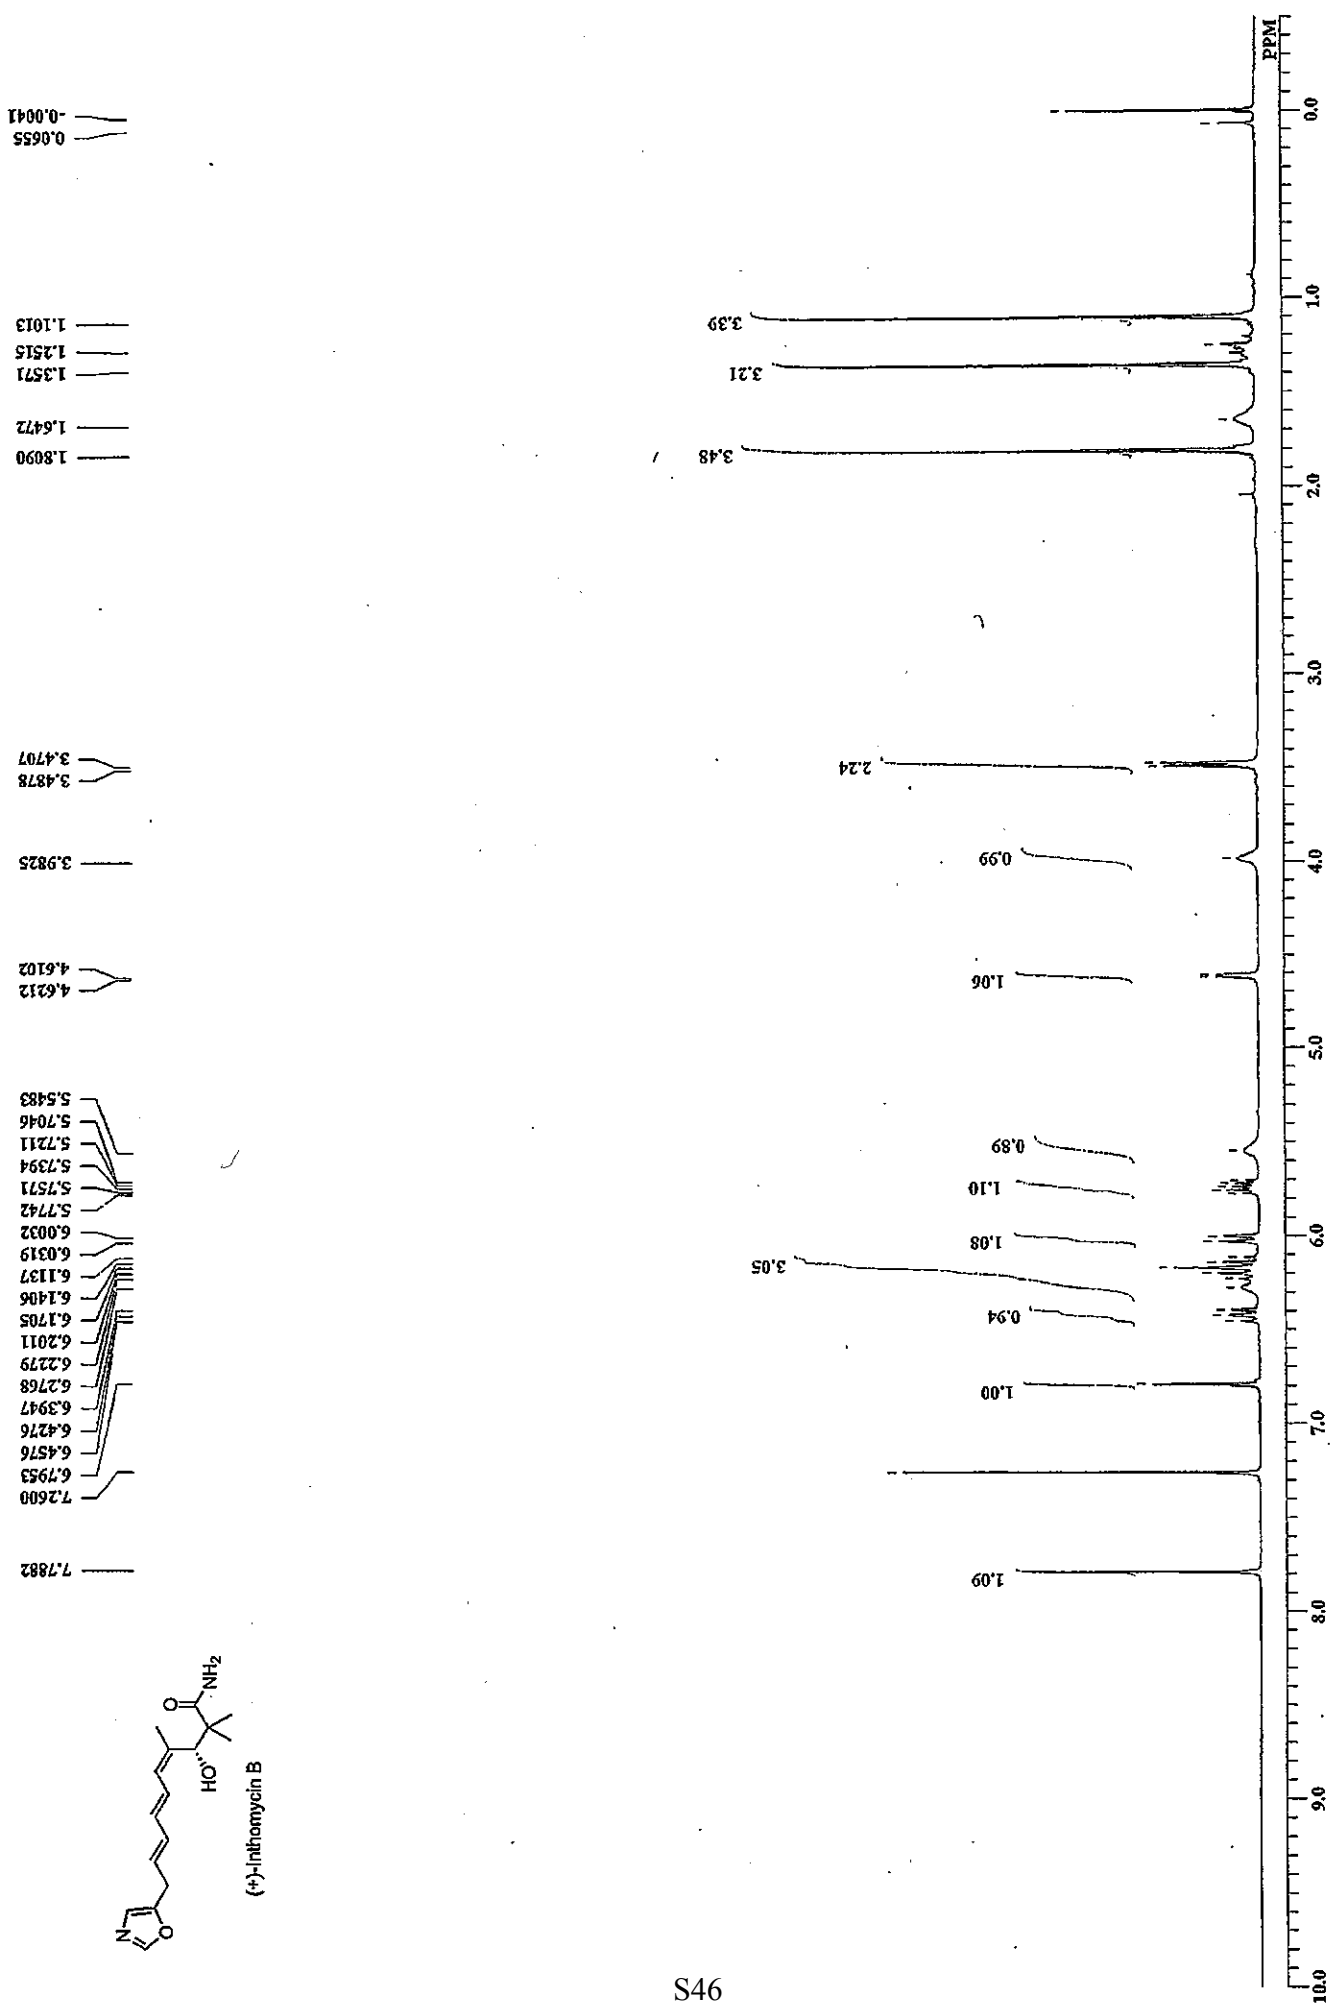

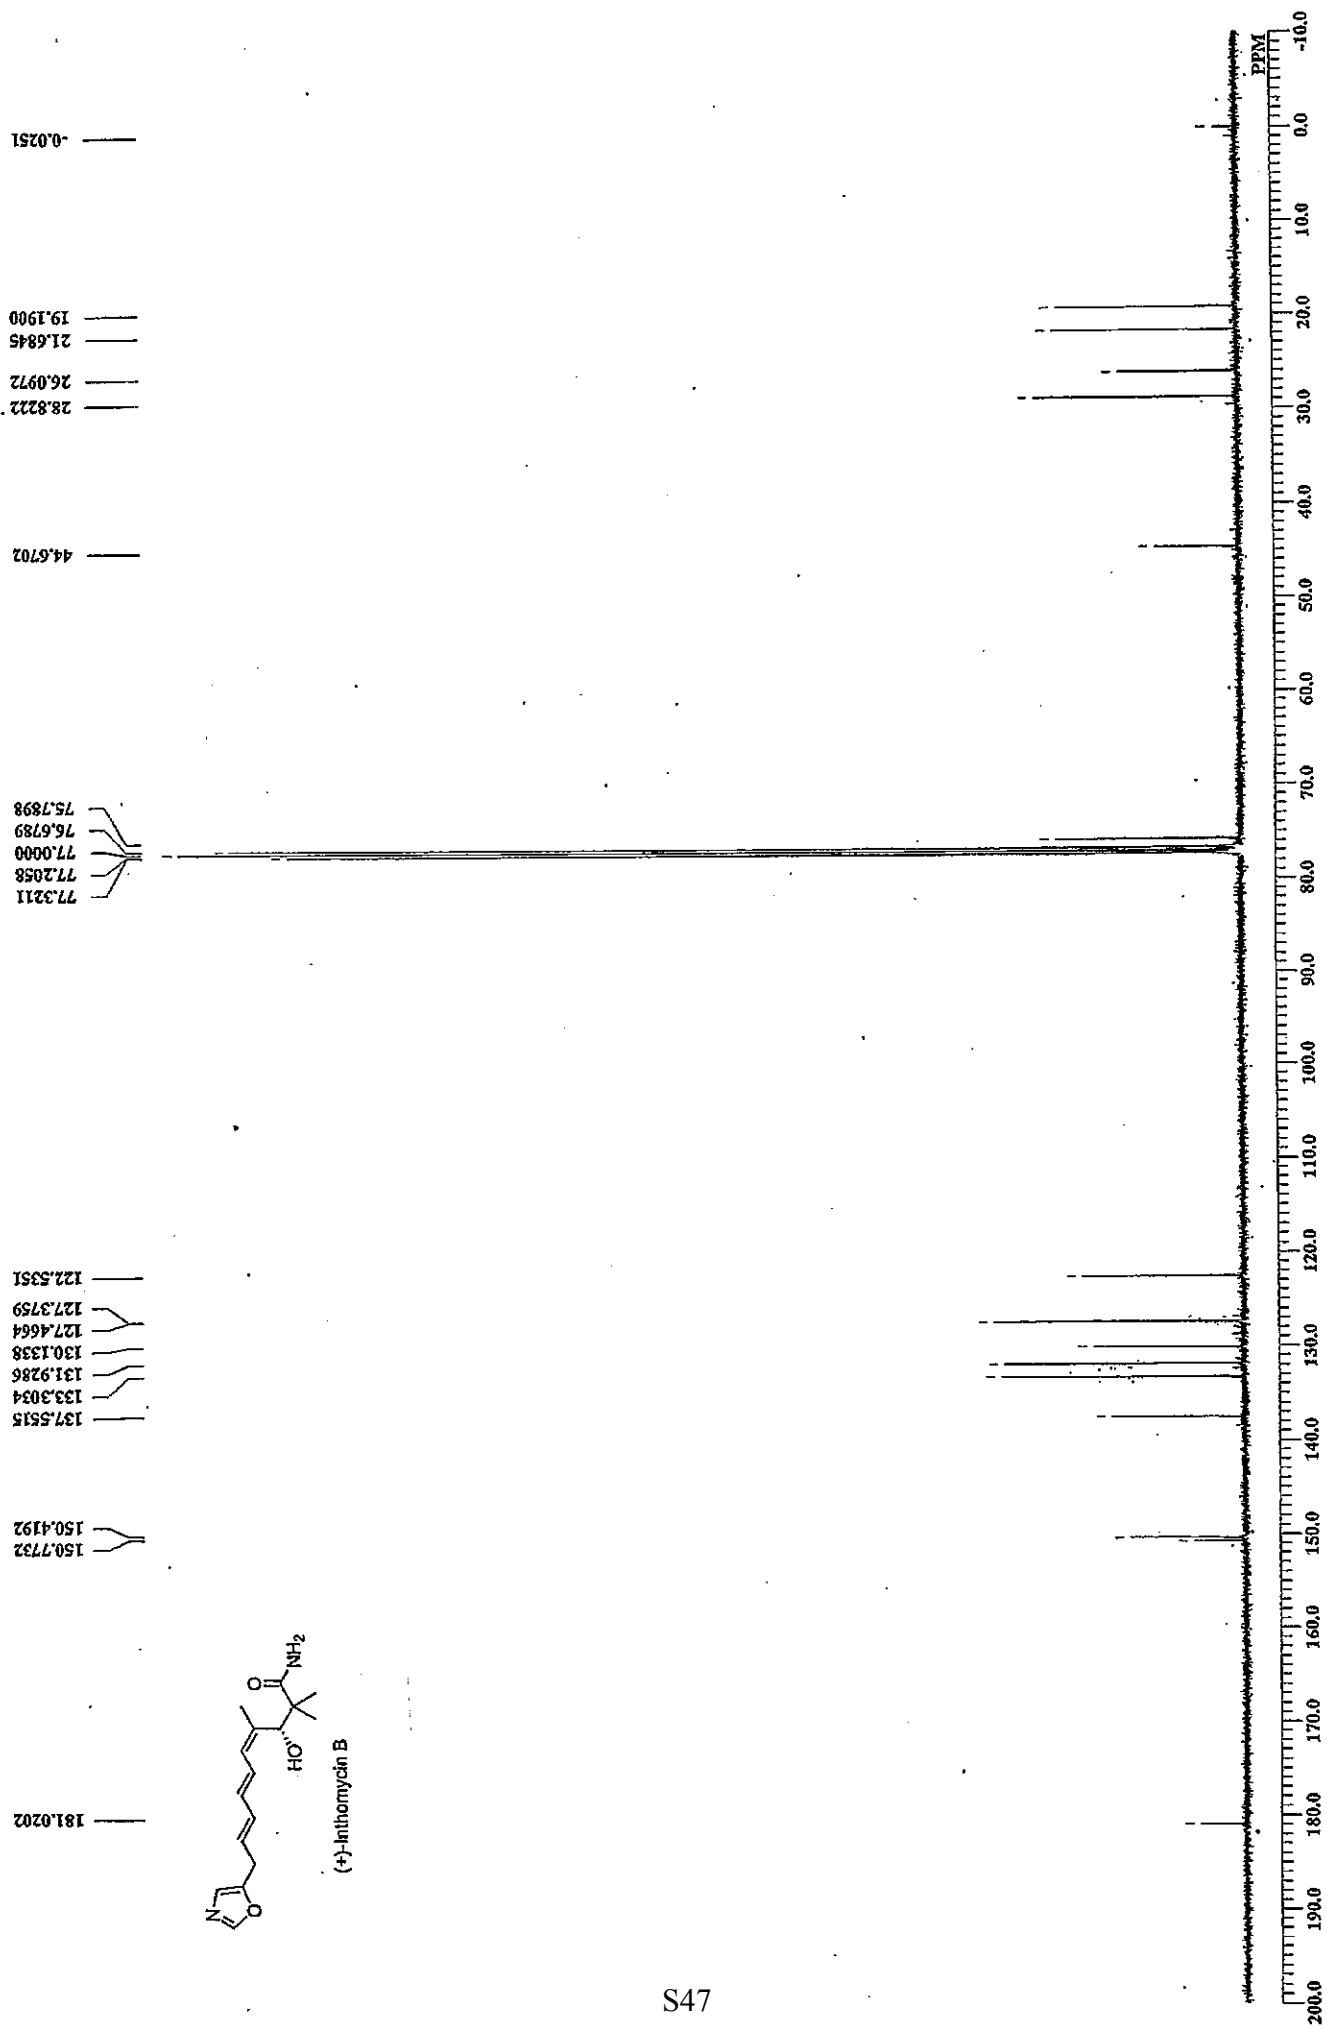

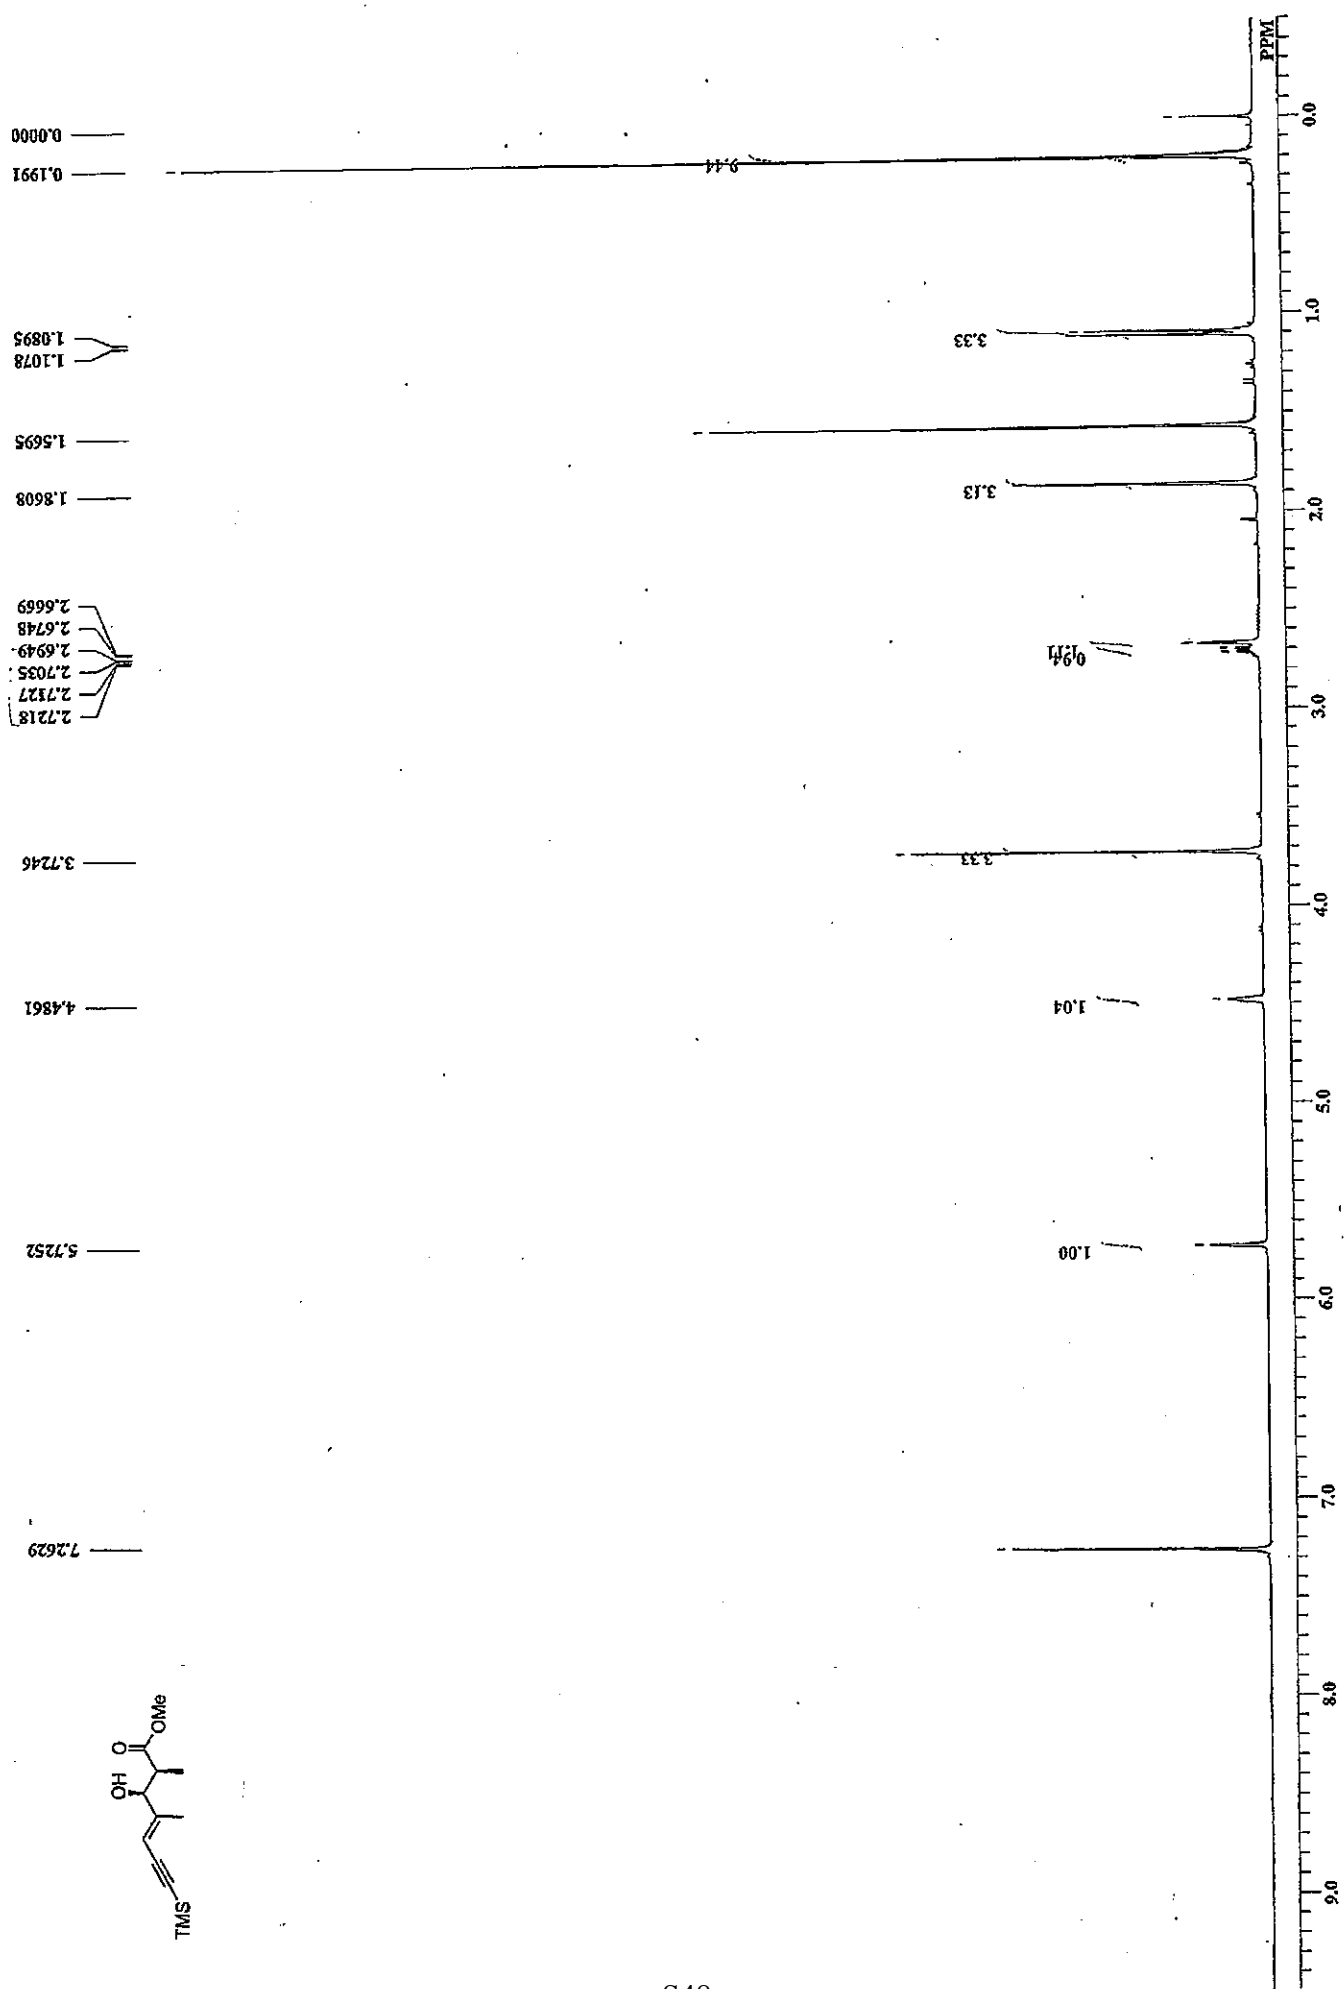



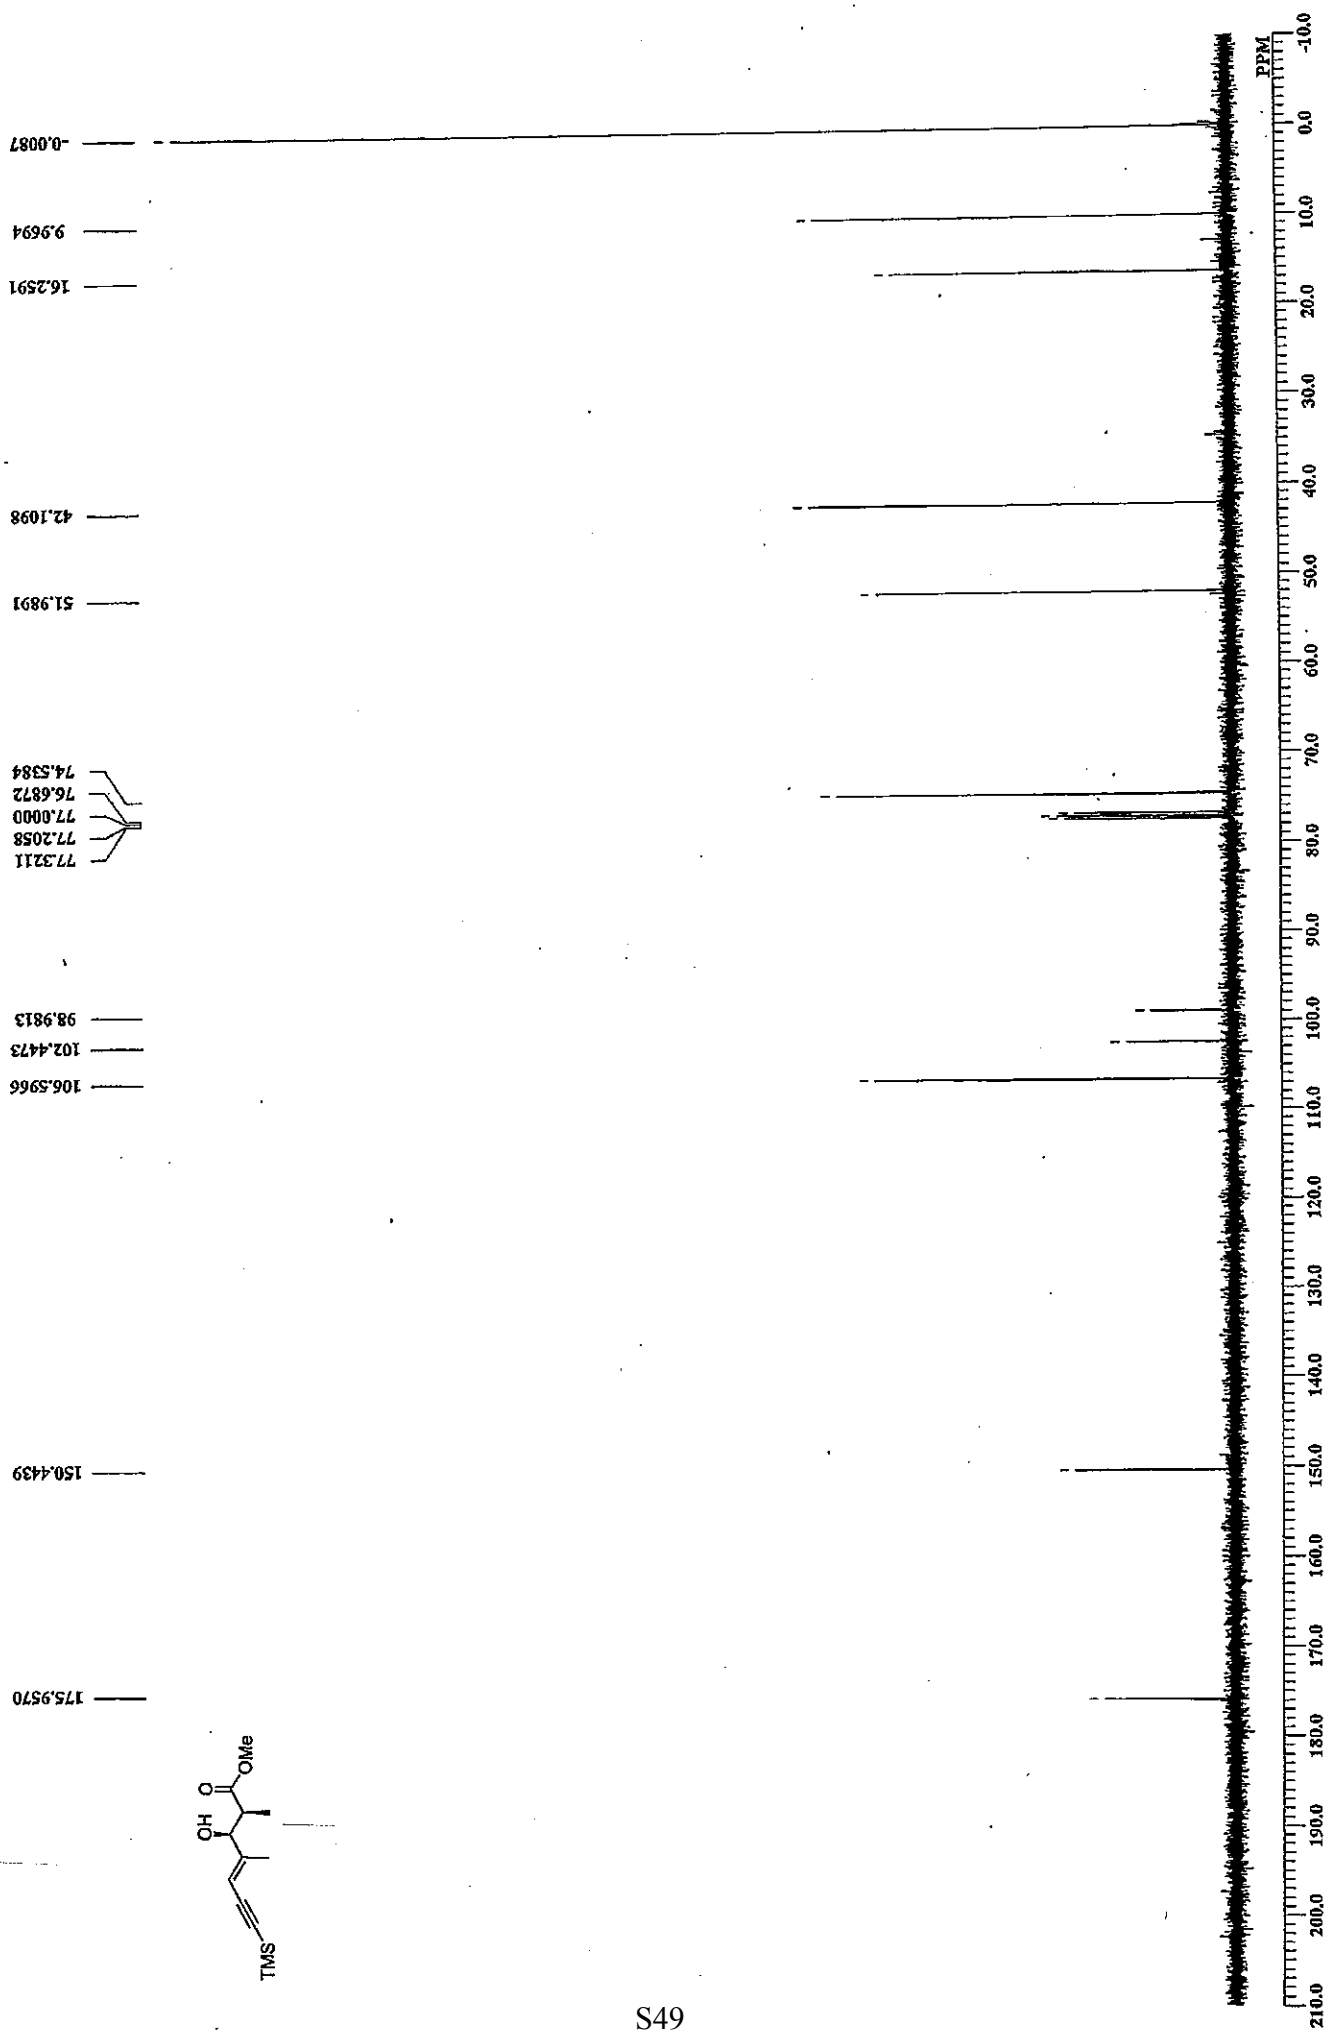

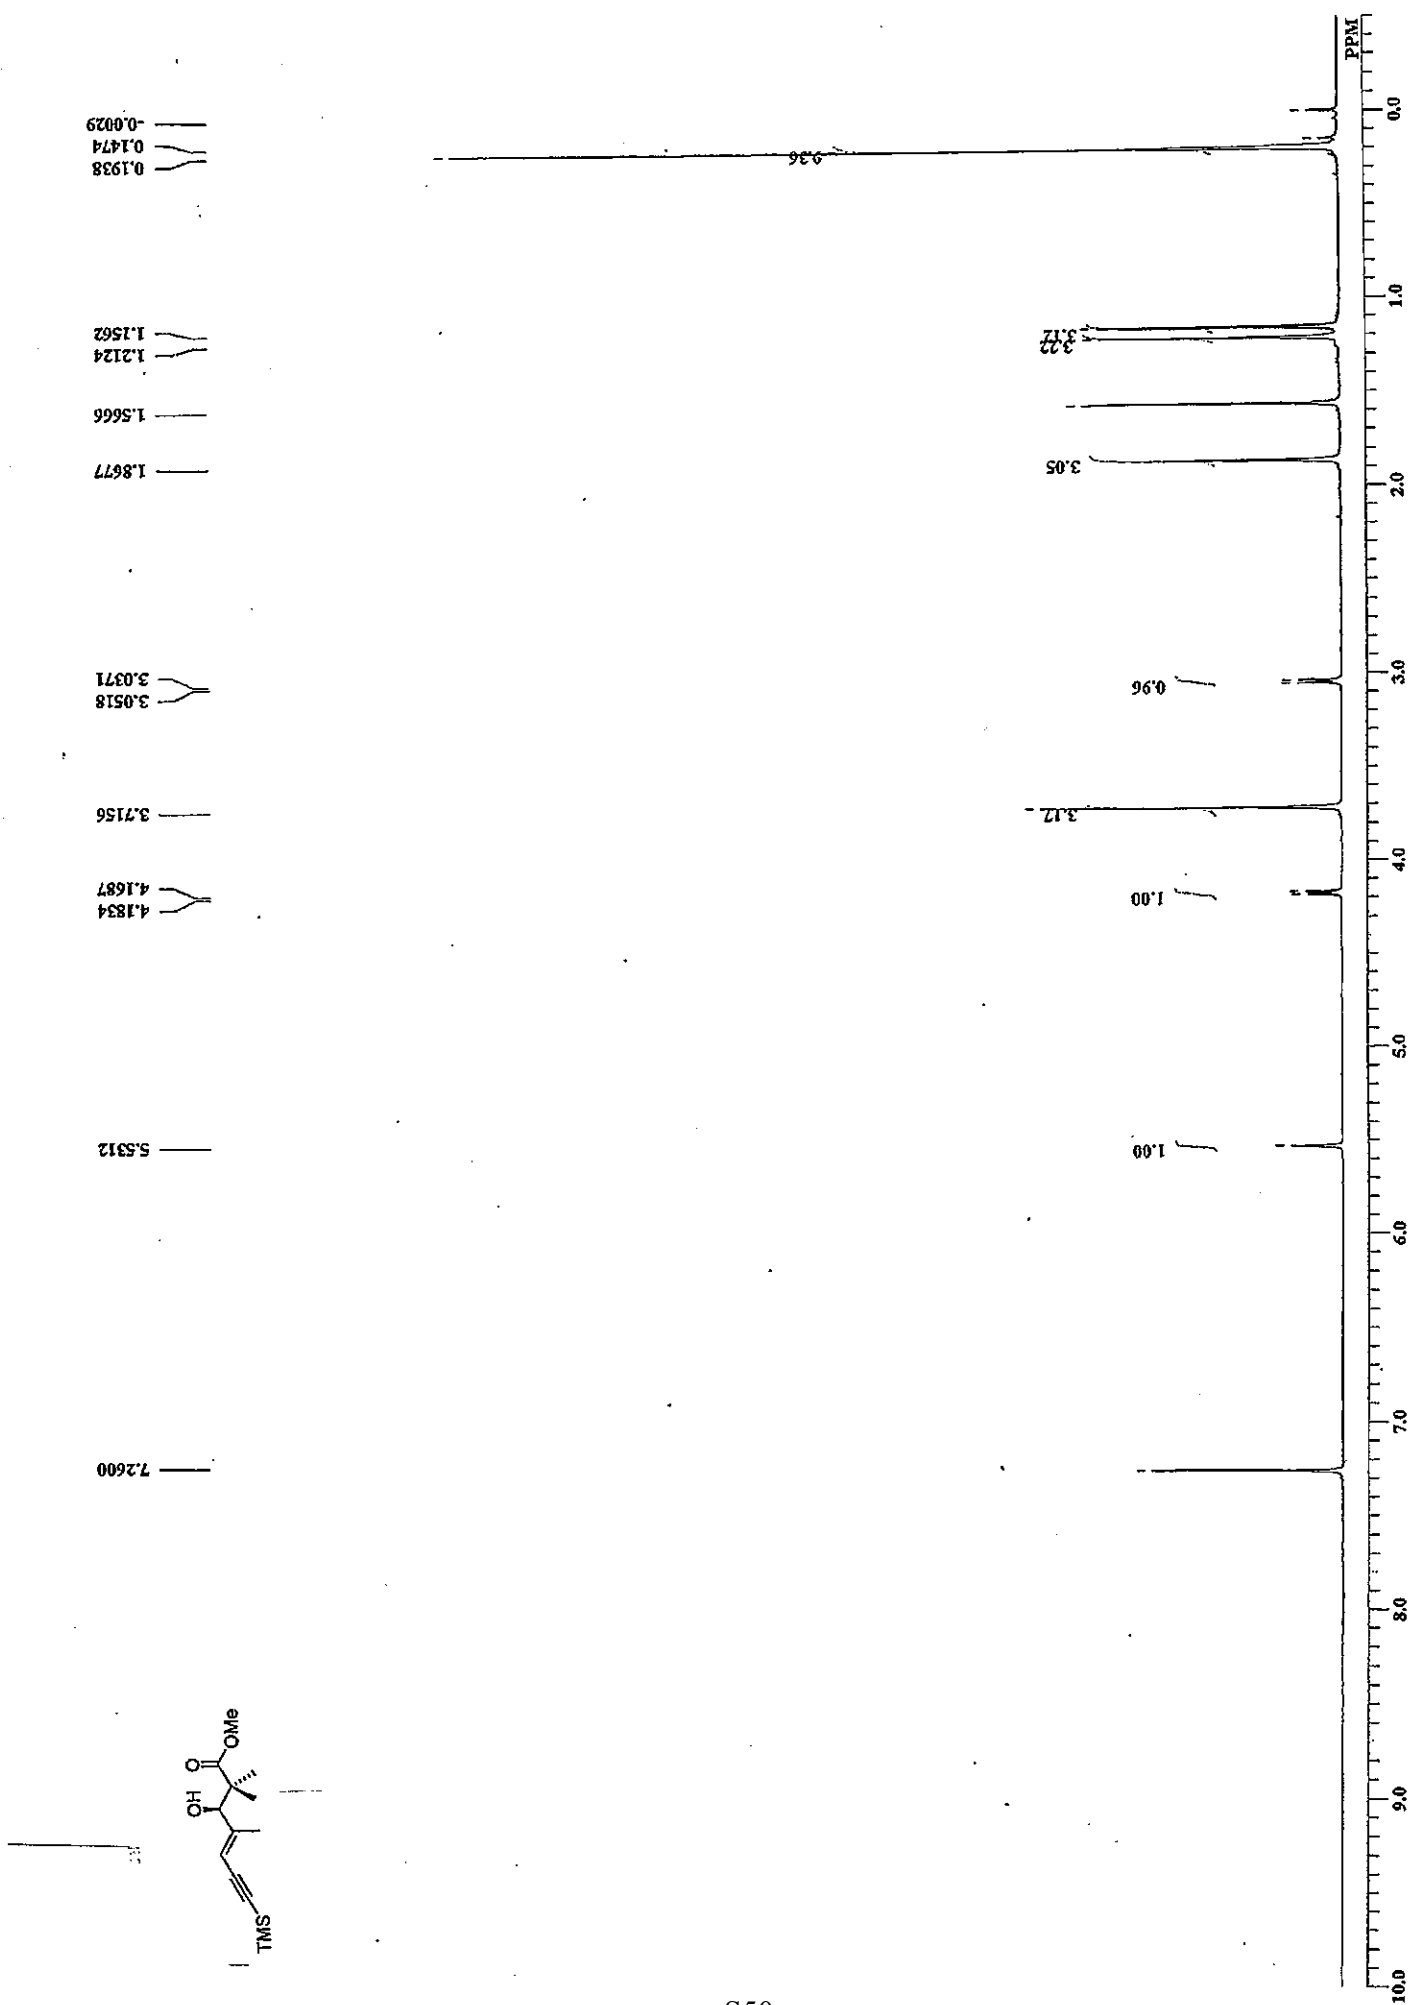

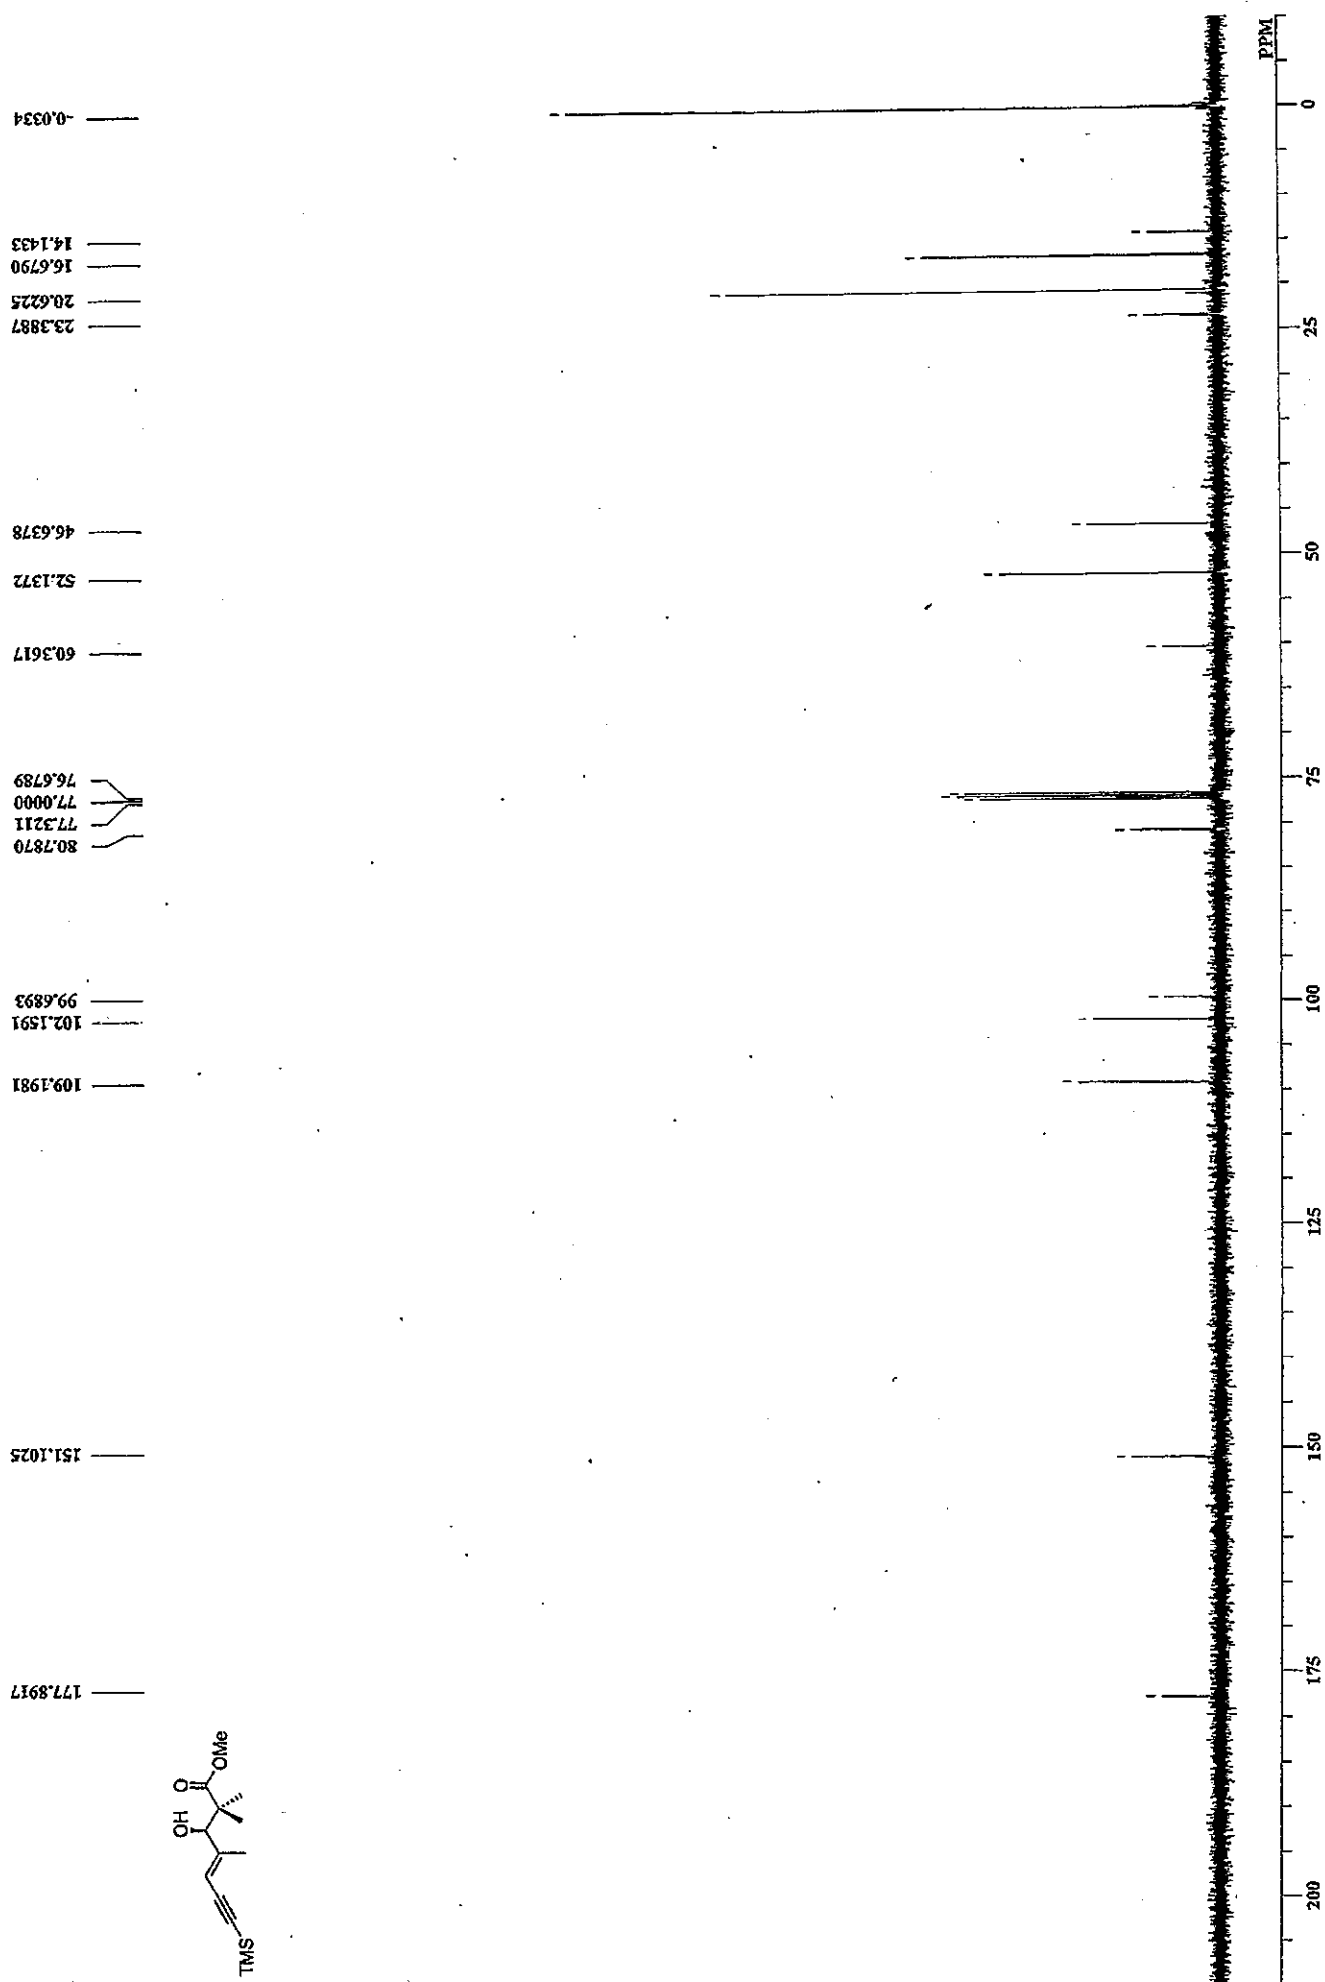

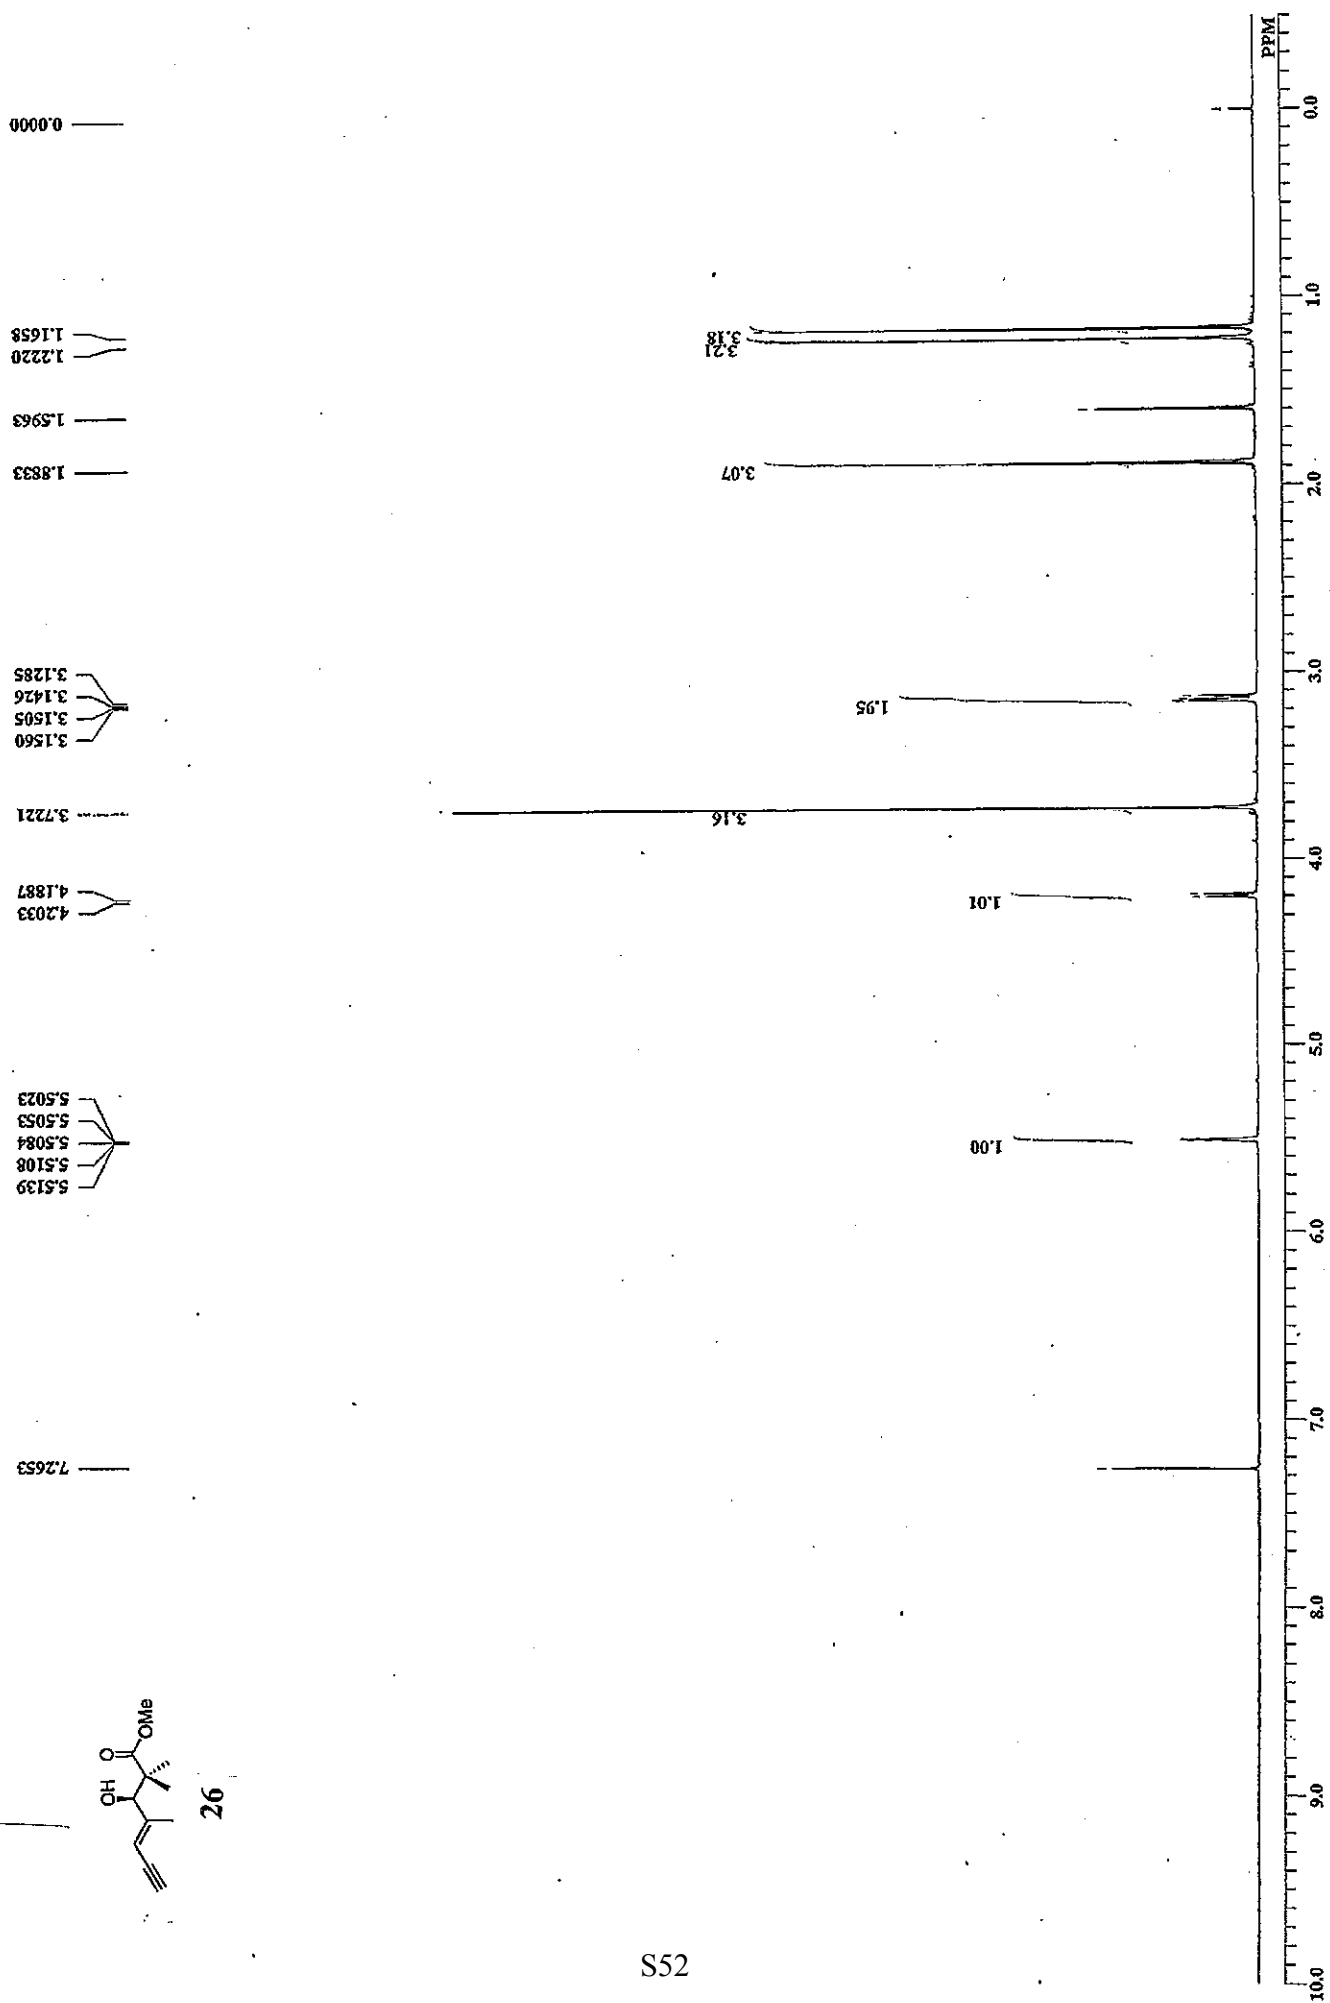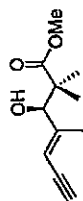

26

16.9013  
20.9847  
23.7920

46.8848  
52.5242

77.0000  
77.3211  
77.6339  
80.9435  
81.1164  
82.6394

108.4572

152.0246

178.2458

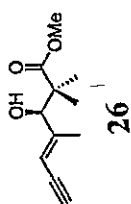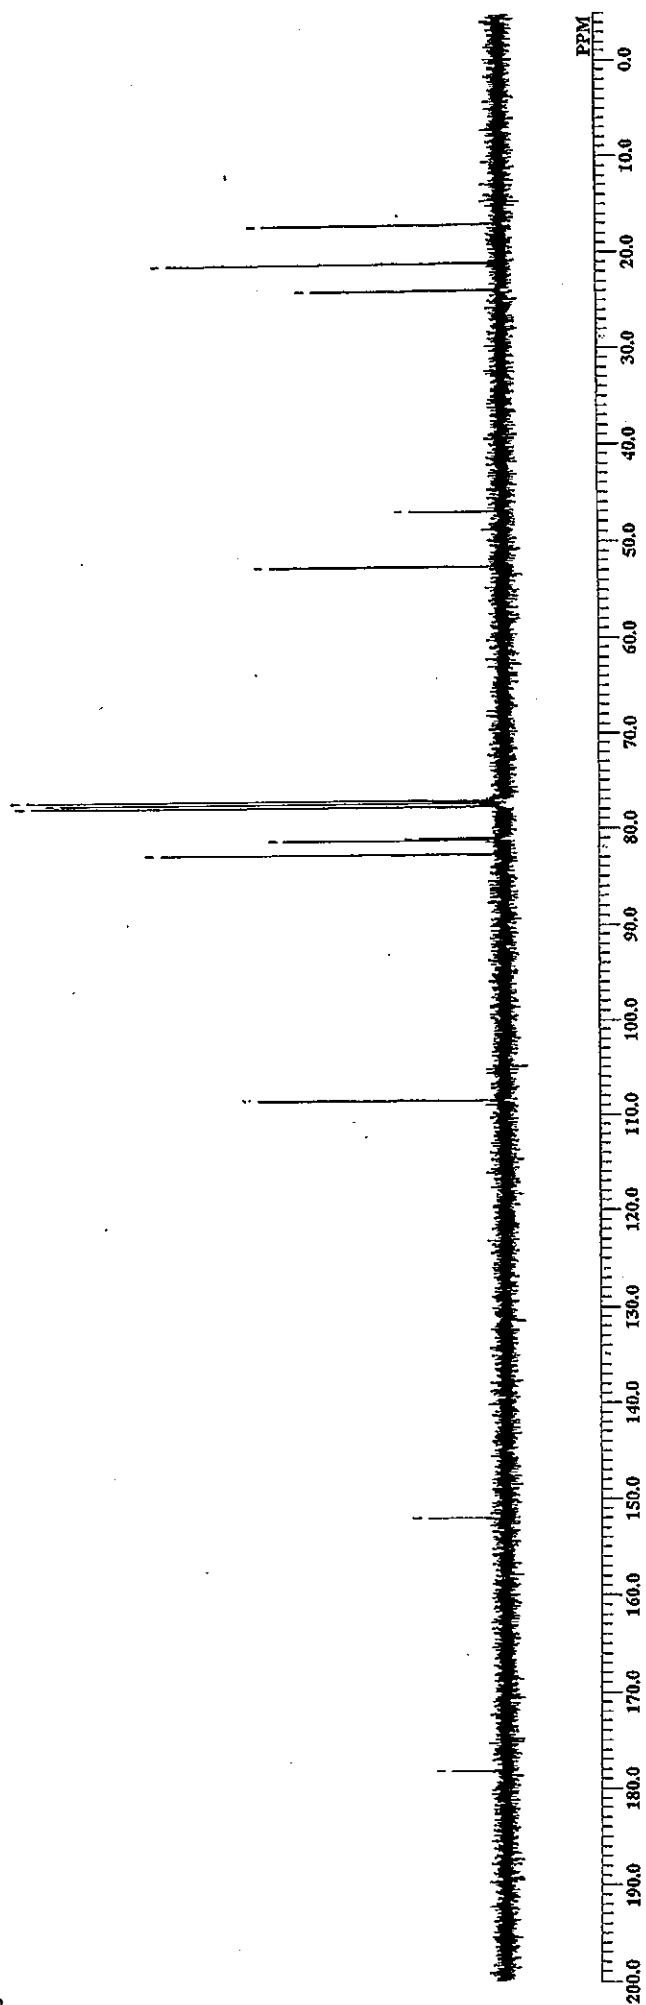

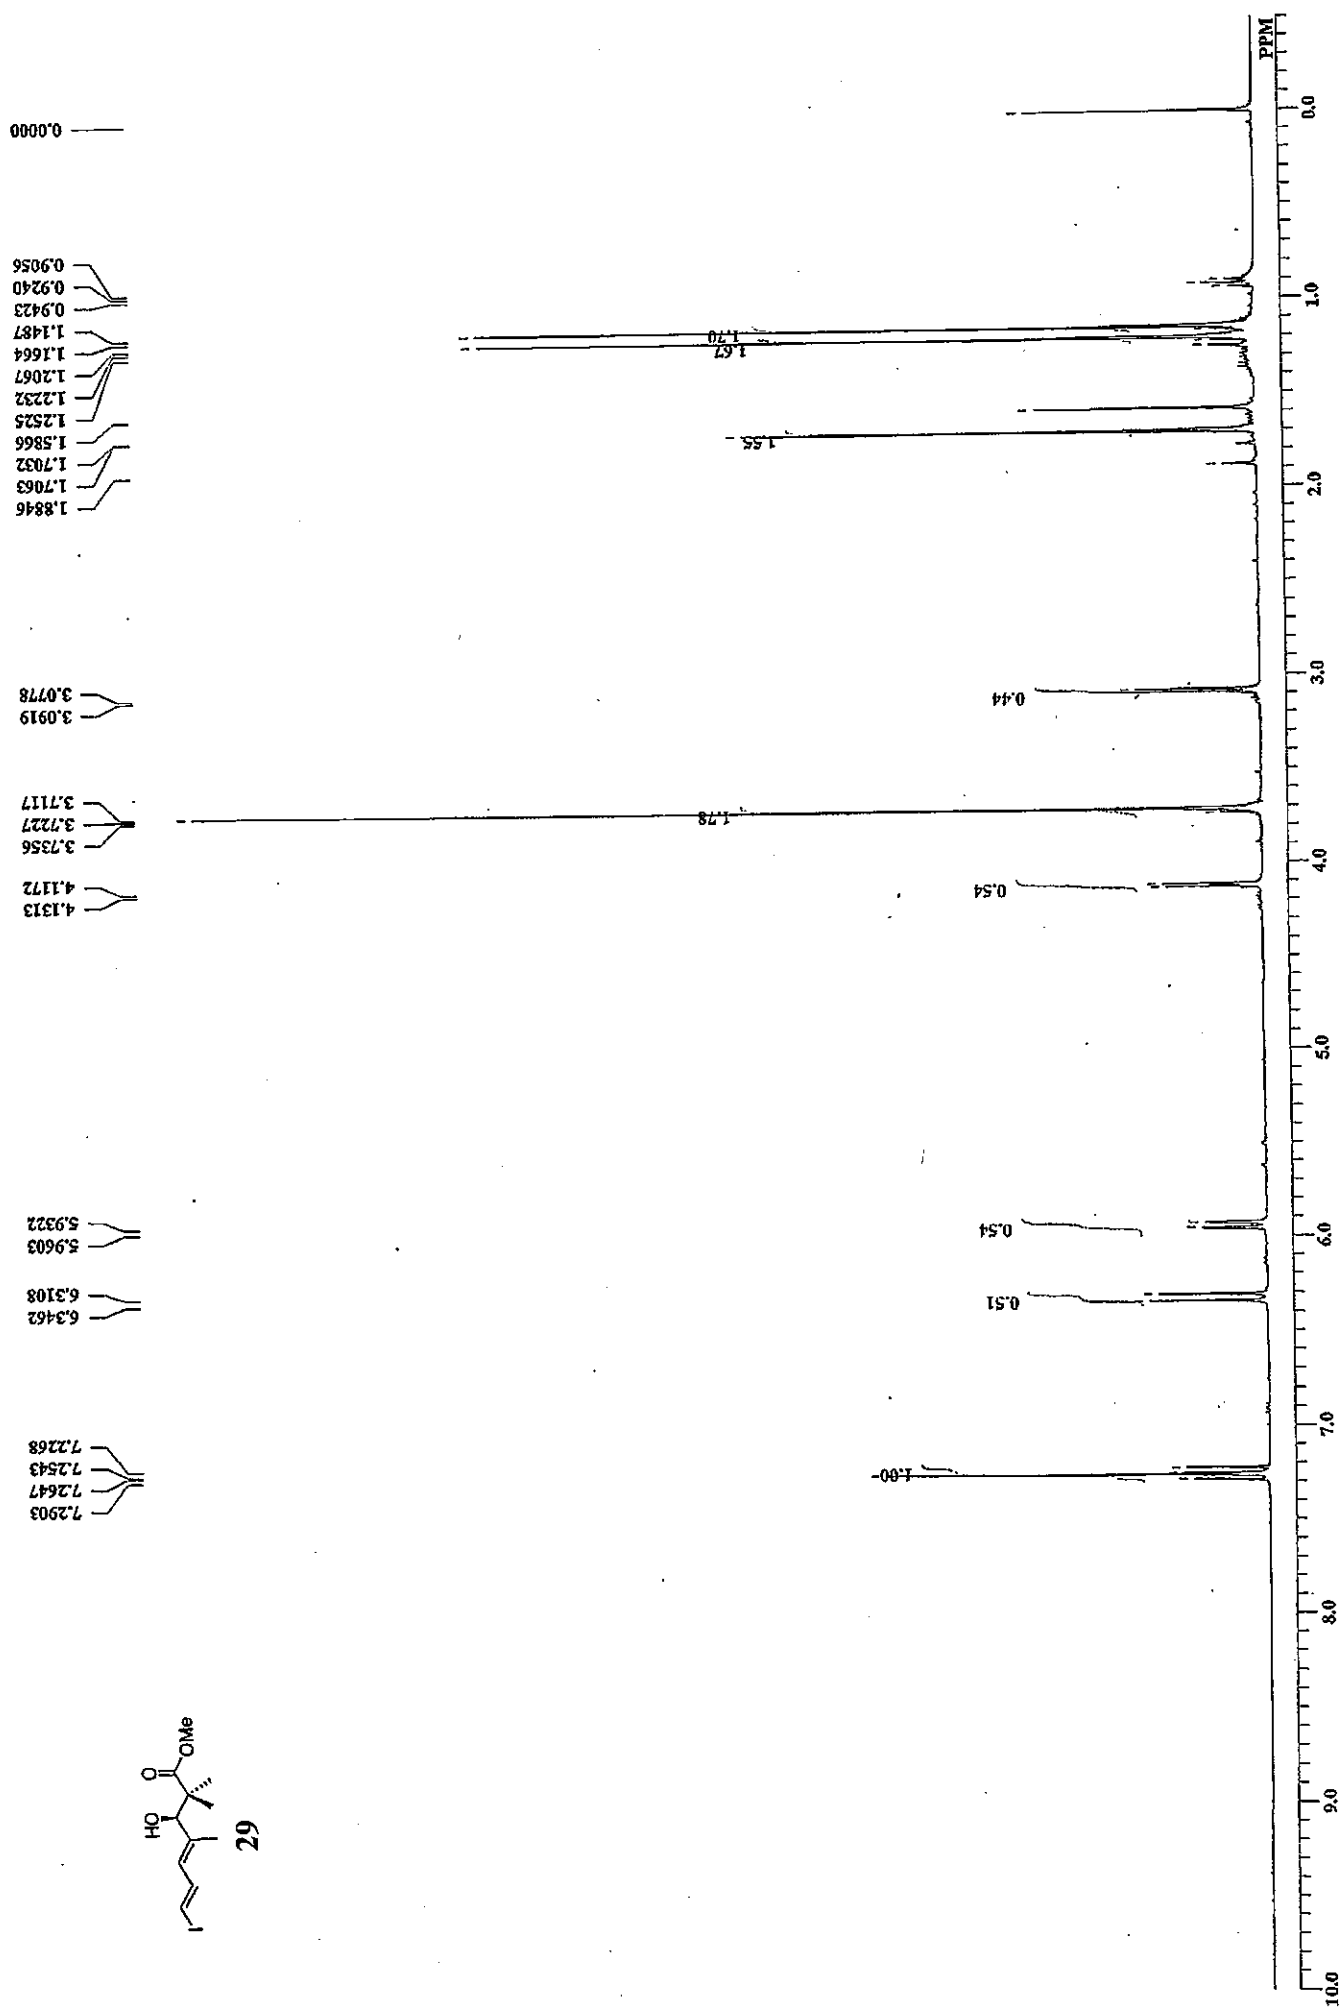

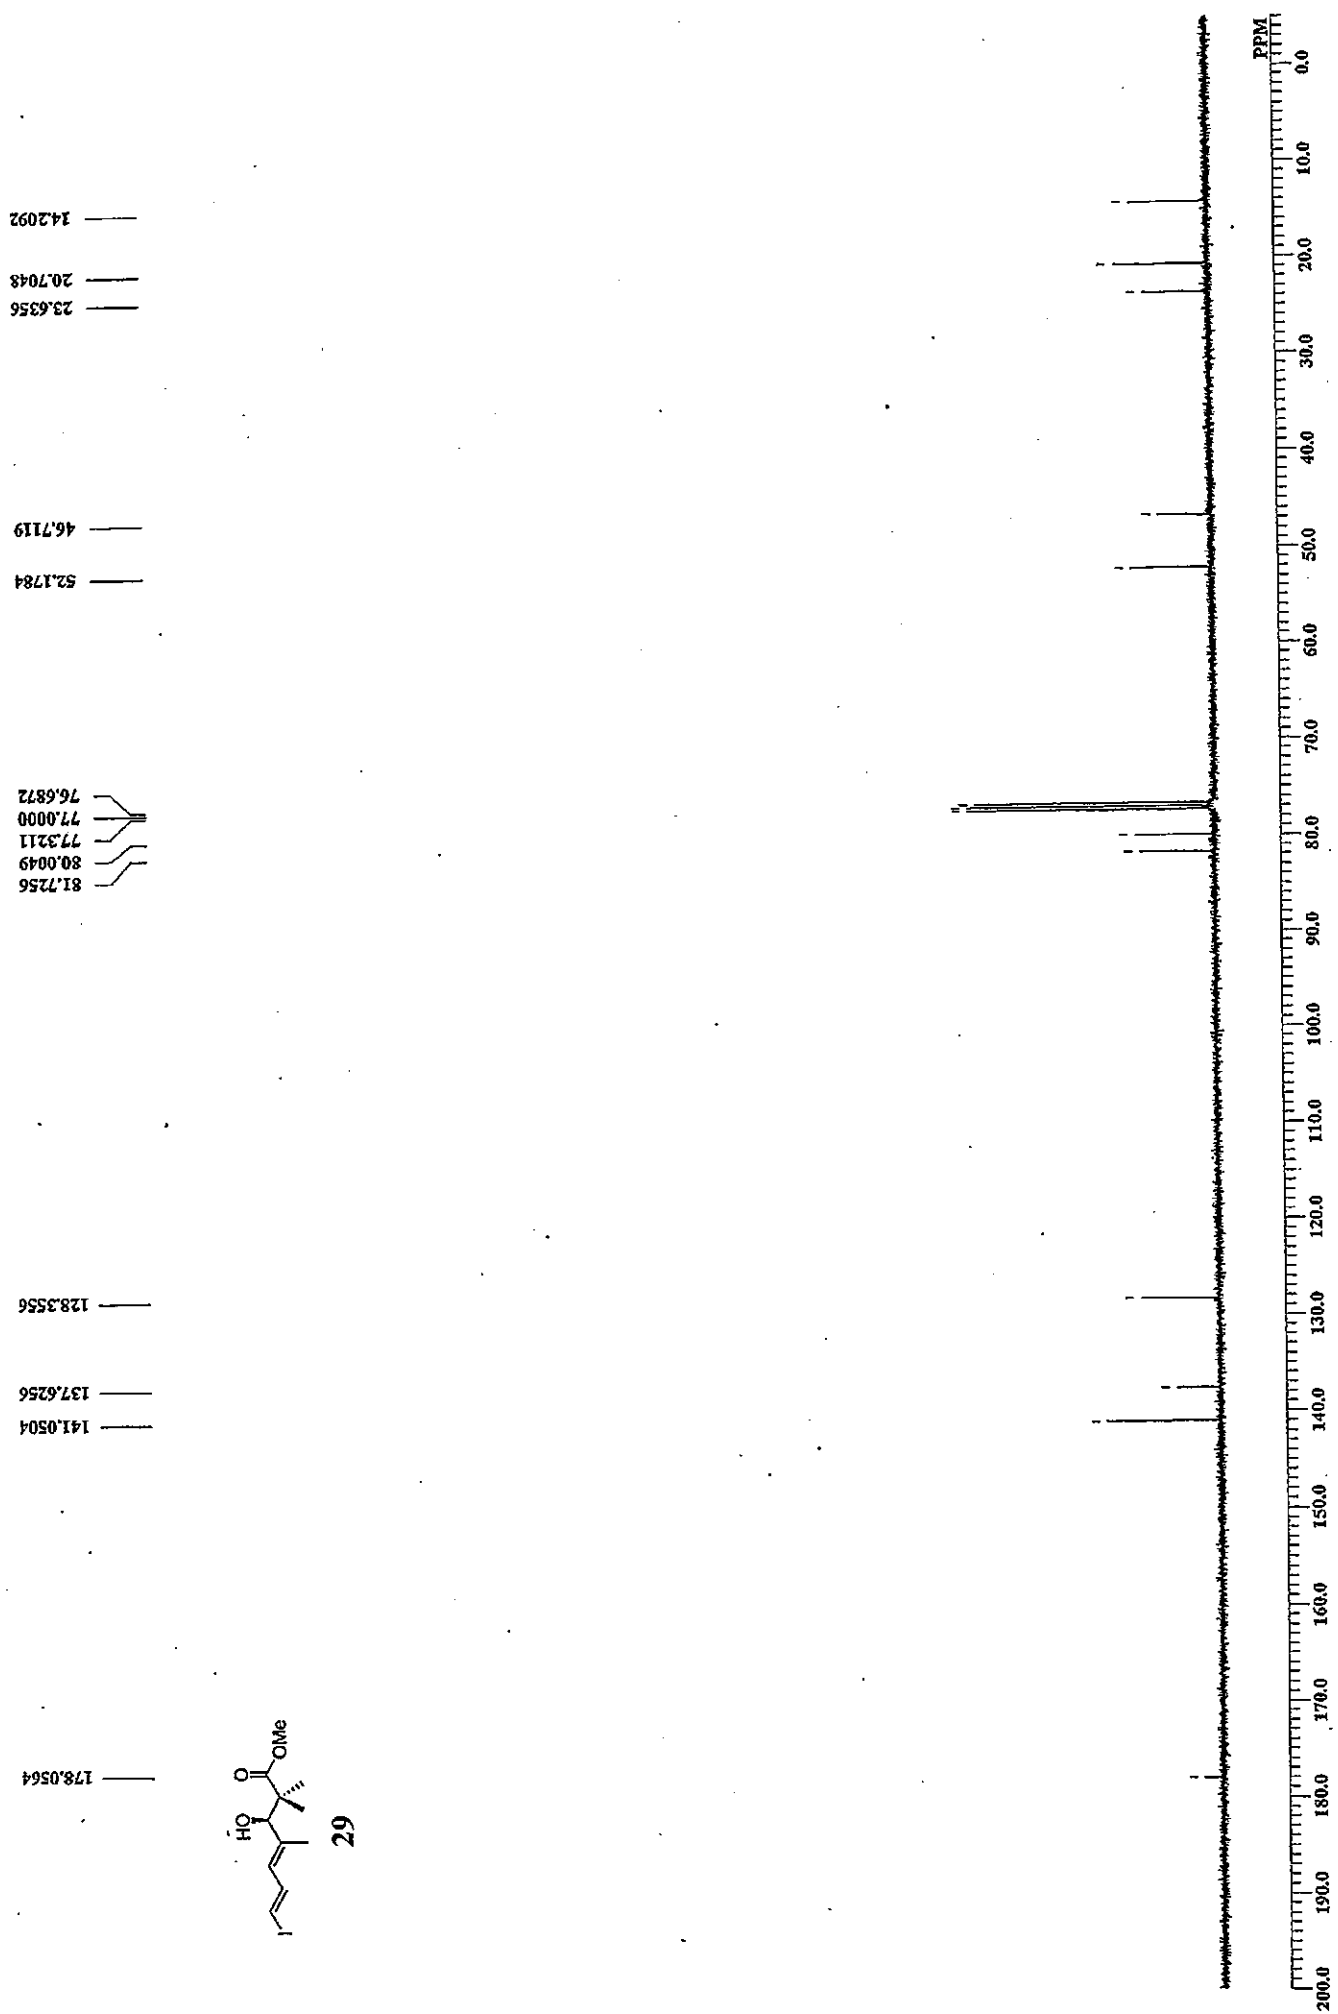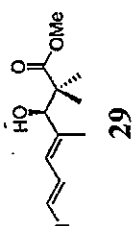

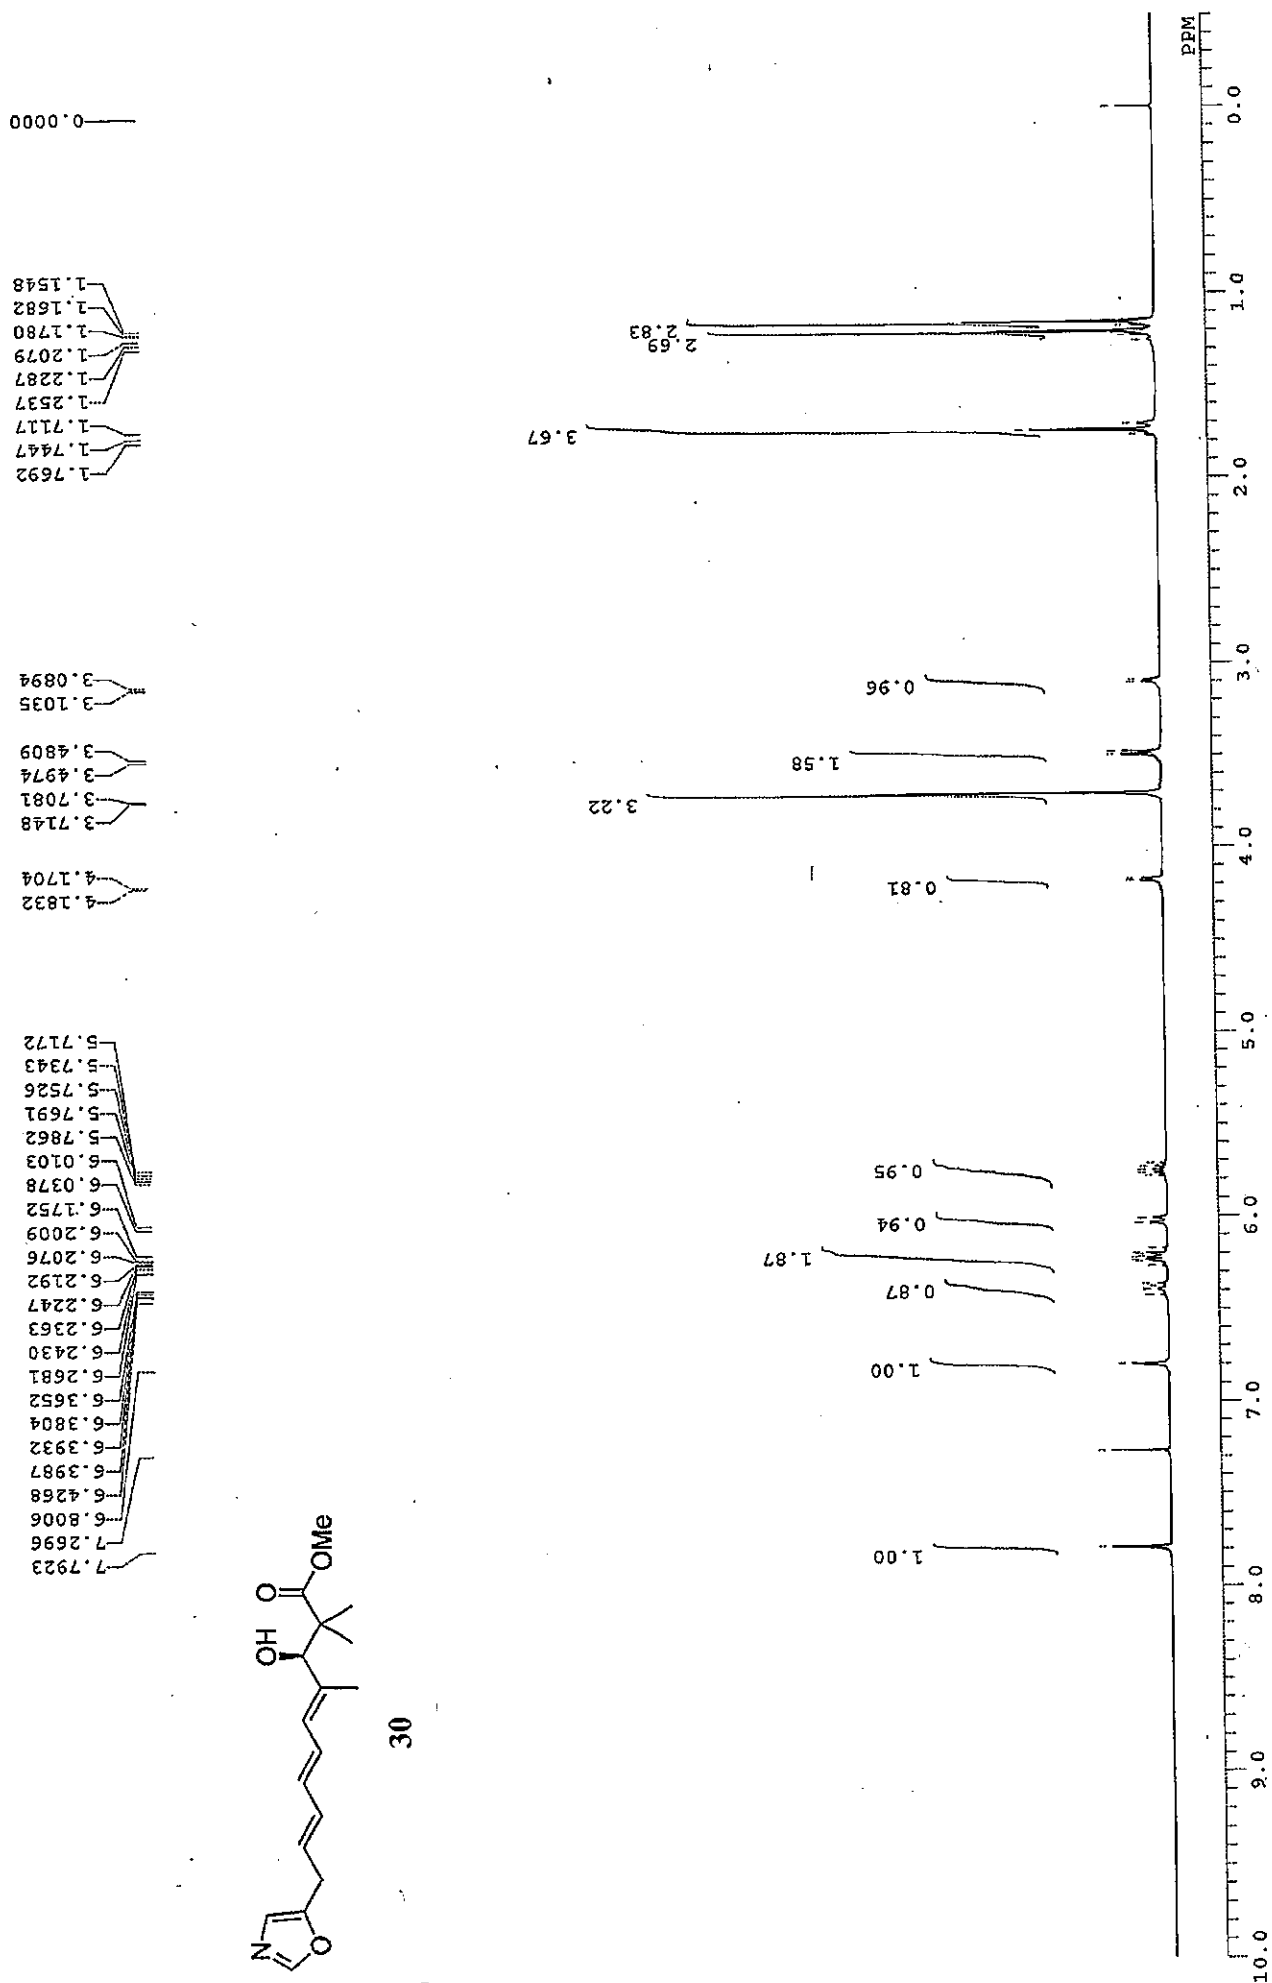



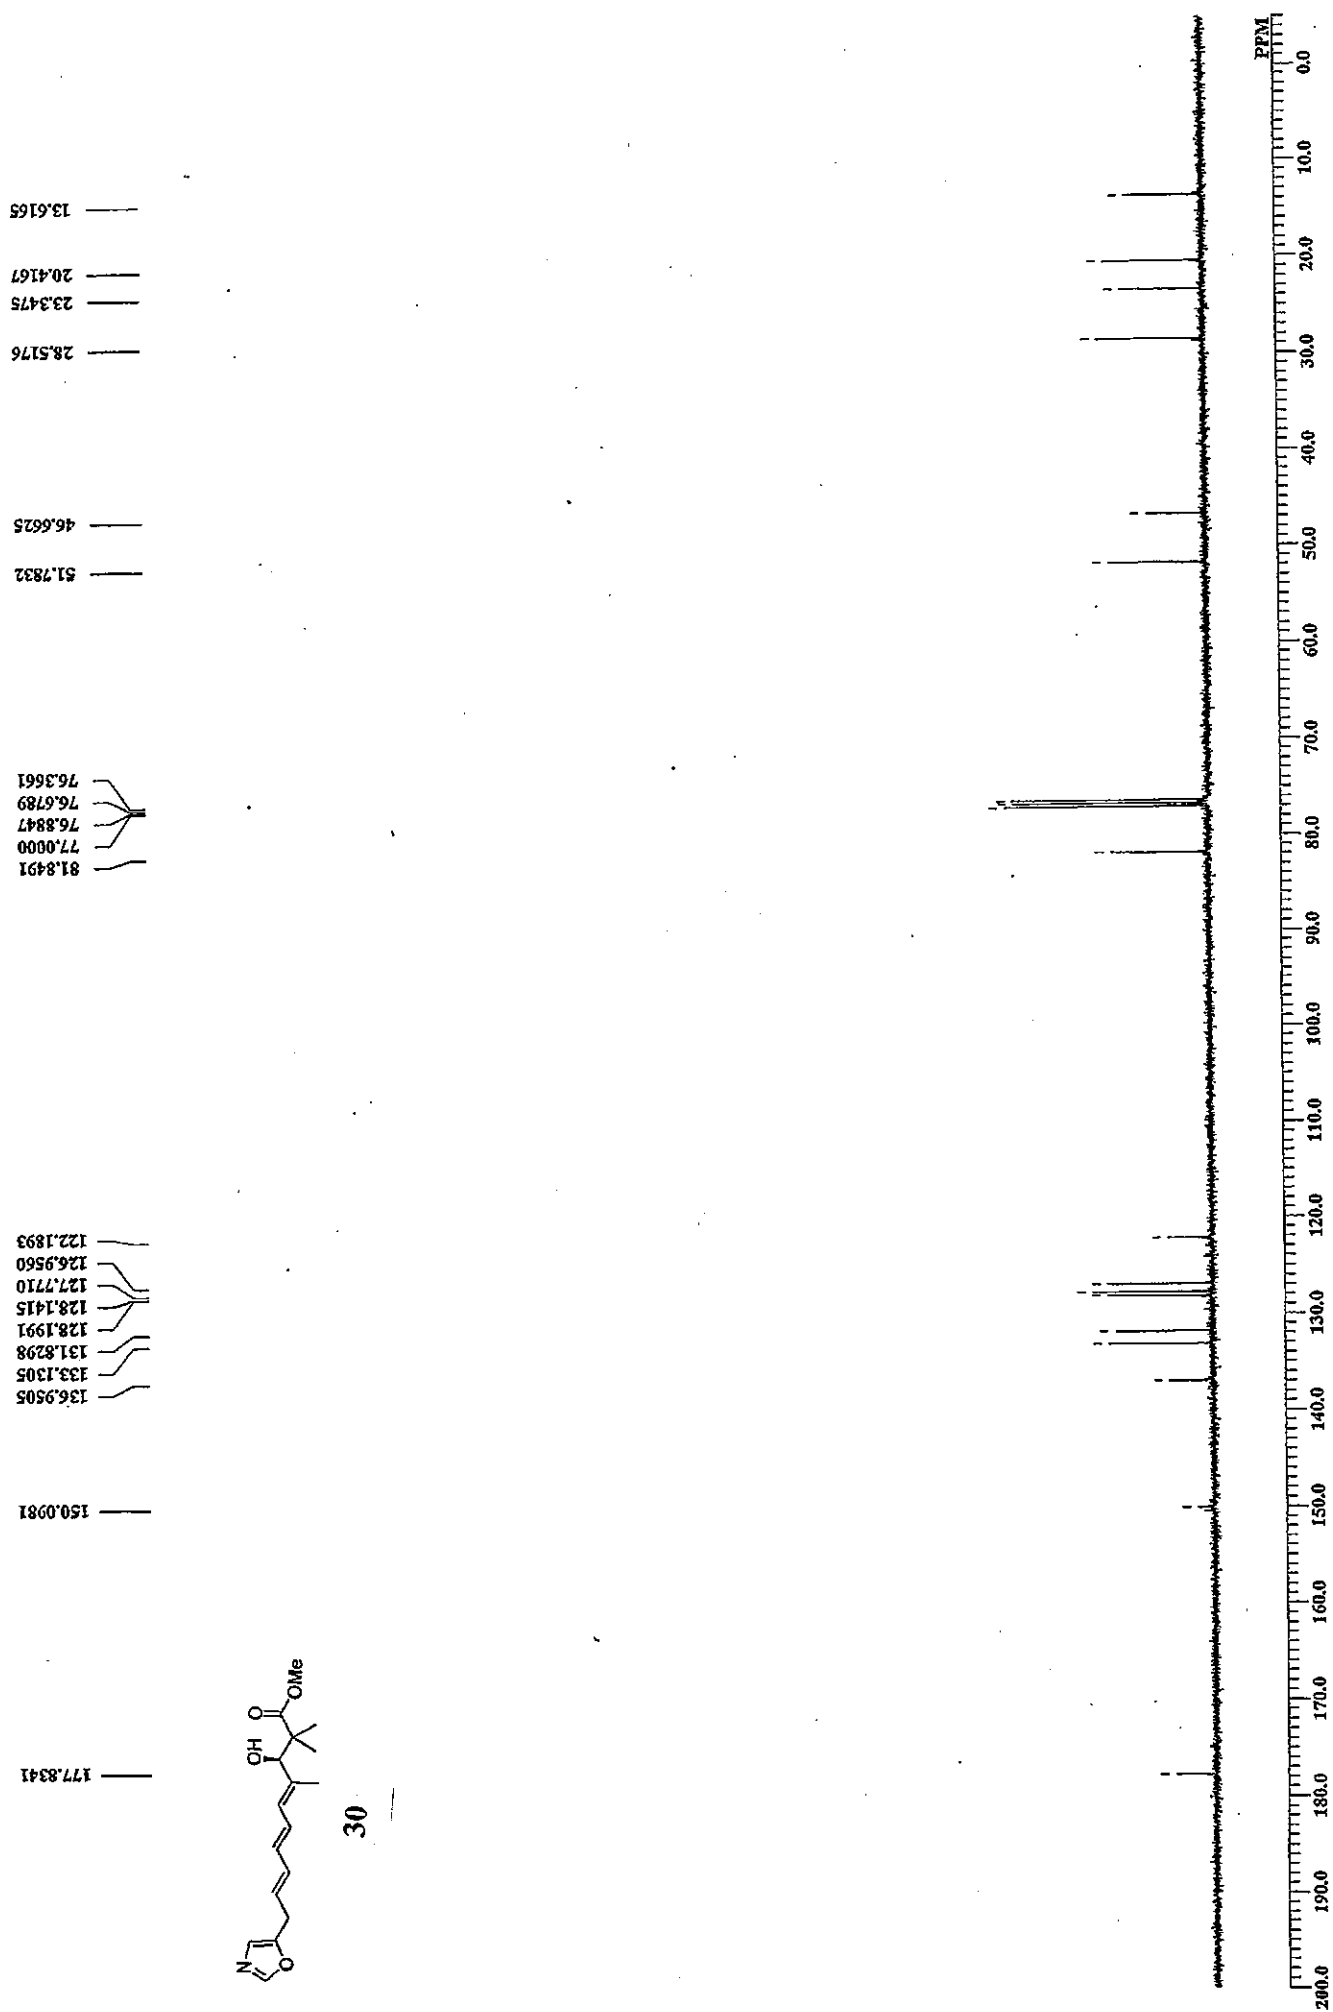

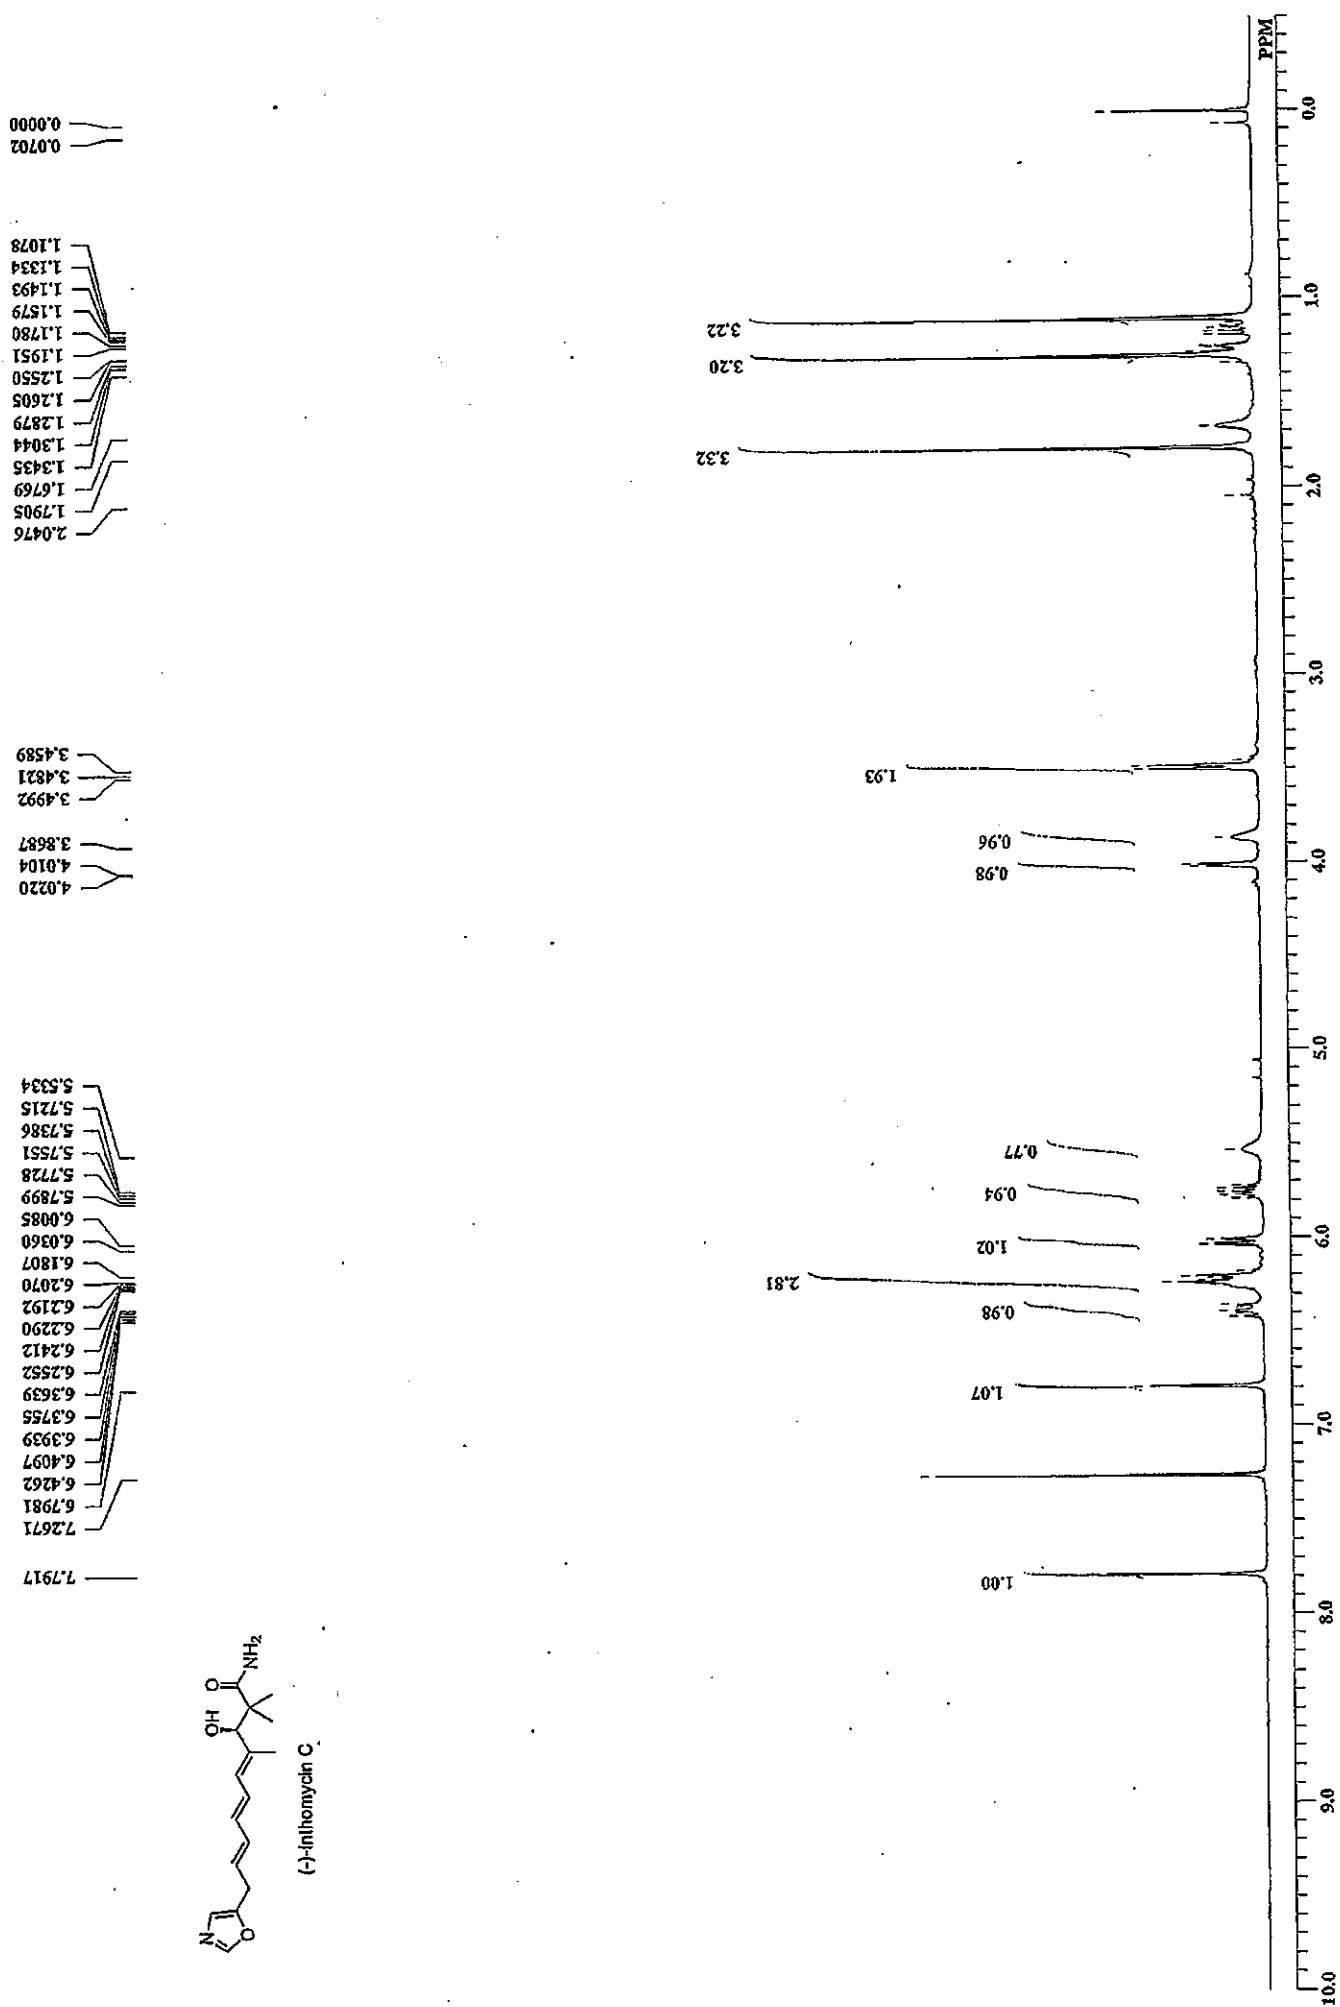

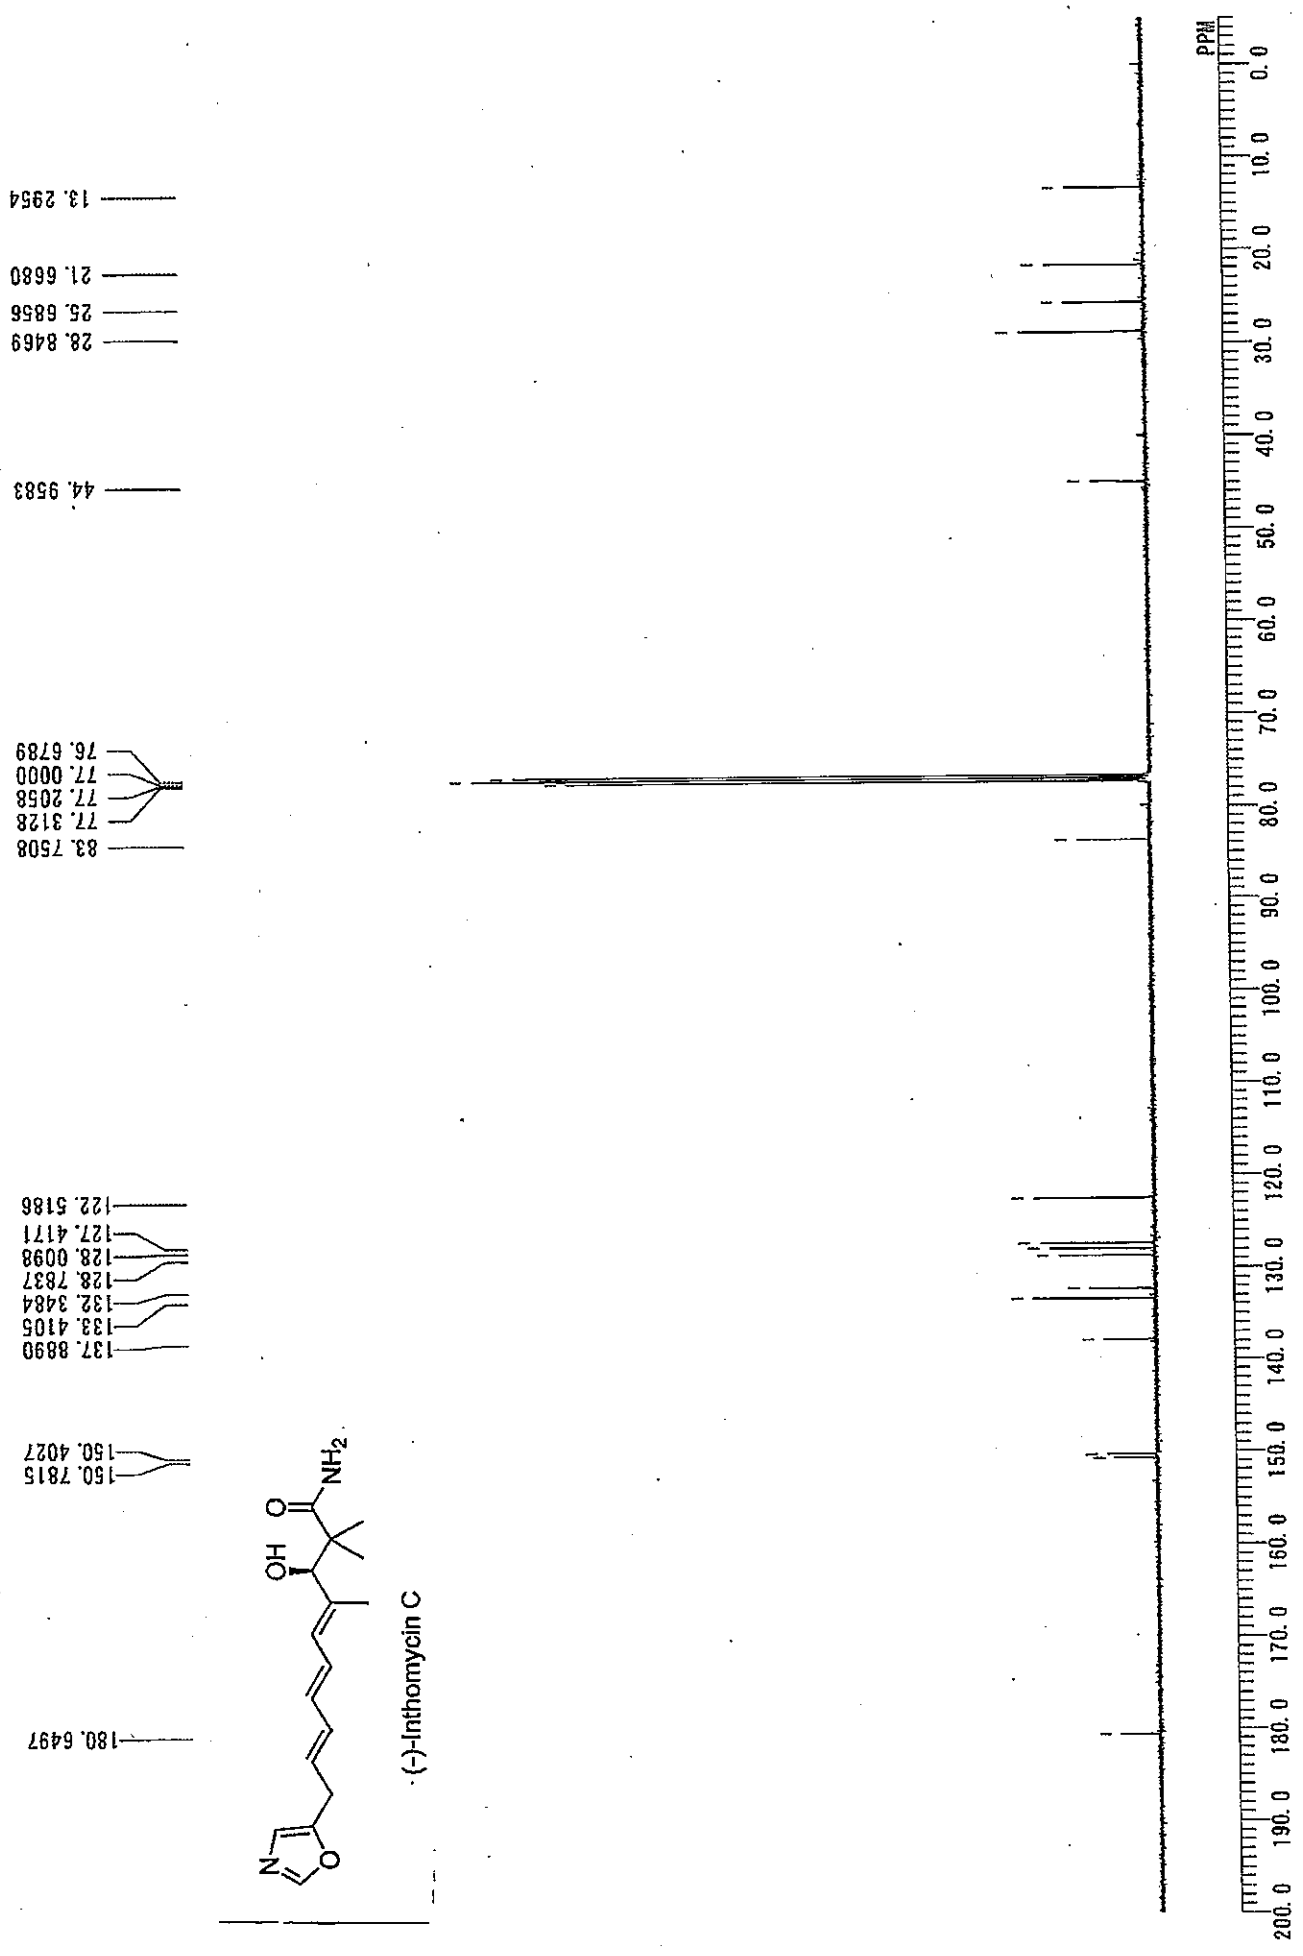

Supplement: c2ob26084k.pdf [file c2ob26084k.pdf]
